# Supplementary material for: Ocellatuperoxides A–F, Uncommon Anti-Tumoral γ-Pyrone Peroxides from a Photosynthetic Mollusk Placobranchus ocellatus
Source: MDPI journal article supplement (doi:10.3390/md20100590), 2022-09-21
Supplement: s1 [file s1]

## Ocellatuperoxides A–F, Uncommon Anti-tumoral $\gamma$ -Pyrone Peroxides from a Photosynthetic Mollusk *Placobranchus ocellatus*

Song-Wei Li<sup>1,2,†</sup>, Qihao Wu<sup>1,†</sup>, Heng Xu<sup>1</sup>, Li-Gong Yao<sup>1,3,4</sup>, Cheng Luo<sup>1,4</sup>, Hong Wang<sup>2</sup>, Hao Zhang<sup>1,\*</sup>, Xu-Wen Li<sup>1,3,4,\*</sup>, and Yue-Wei Guo<sup>1,2,3,4,\*</sup>

<sup>1</sup> State Key Laboratory of Drug Research, Shanghai Institute of Materia Medica, Chinese Academy of Sciences, Shanghai 201203, China; [songweili93@zjut.edu.cn](mailto:songweili93@zjut.edu.cn) (S.-W.L.); [qihao.wu@yale.edu](mailto:qihao.wu@yale.edu) (Q.W.); [idaheng@simmm.ac.cn](mailto:idaheng@simmm.ac.cn) (H.X.); [yaoligong@simmm.ac.cn](mailto:yaoligong@simmm.ac.cn) (L.-G.Y.); [cluo@simmm.ac.cn](mailto:cluo@simmm.ac.cn) (C.L.)

<sup>2</sup> Collaborative Innovation Center of Yangtze River Delta Region Green Pharmaceuticals, College of Pharmaceutical Science, Zhejiang University of Technology, Hangzhou 310014, China; [hongw@zjut.edu.cn](mailto:hongw@zjut.edu.cn) (H.W.)

<sup>3</sup> Shandong Laboratory of Yantai Drug Discovery, Bohai Rim Advanced Research Institute for Drug Discovery, Yantai, Shandong 264117, China

<sup>4</sup> Open Studio for Druggability Research of Marine Natural Products, Qingdao National Laboratory for Marine Science and Technology, 1 Wenhai Road, Aoshanwei, Jimo, Qingdao 266237, China

\* Correspondence: [hao\\_cadd@simmm.ac.cn](mailto:hao_cadd@simmm.ac.cn) (H.Z.); [xwli@simmm.ac.cn](mailto:xwli@simmm.ac.cn) (X.-W.L.); [ywguo@simmm.ac.cn](mailto:ywguo@simmm.ac.cn) (Y.-W.G.); Tel.: +86-21-50805813 (Y.-W.G.)

† These authors contributed equally to this work

# Contents

|                                                                                                                              |    |
|------------------------------------------------------------------------------------------------------------------------------|----|
| 1. Original data for ocellatuperoxides A–F (1–6) .....                                                                       | 3  |
| 1.1 Bioassays for ocellatuperoxides A–F (1–6) .....                                                                          | 3  |
| 1.2 X-ray crystallographic analysis for ocellatuperoxide A (1).....                                                          | 4  |
| 1.3 Chiral HPLC analysis chromatography of ocellatuperoxides A–F (1–6) .....                                                 | 9  |
| 1.4 Specific optical rotations of ocellatuperoxides A–F (1–6).....                                                           | 11 |
| 1.5 NMR, HR-ESI-MS, IR, and UV spectra of ocellatuperoxide A (1) .....                                                       | 15 |
| 1.6 NMR, HR-ESI-MS, IR, and UV spectra of ocellatuperoxide B (2).....                                                        | 24 |
| 1.7 NMR, HR-ESI-MS, IR, and UV spectra of ocellatuperoxide C (3).....                                                        | 33 |
| 1.8 NMR, HR-ESI-MS, IR, and UV spectra of ocellatuperoxide D (4).....                                                        | 42 |
| 1.9 NMR, HR-ESI-MS, IR, and UV spectra of ocellatuperoxide E (5) .....                                                       | 51 |
| 1.10 NMR, HR-ESI-MS, IR, and UV spectra of ocellatuperoxide F (6) .....                                                      | 60 |
| 2. Computational Section .....                                                                                               | 69 |
| 2.1 Computational details .....                                                                                              | 69 |
| 2.3 Cartesian Coordinates, Relative Energies, and Boltzmann populations of all the calculated<br>Low-energy conformers ..... | 70 |

# 1. Original data for ocellatuperoxides A–F (1–6)

## 1.1 Bioassays for ocellatuperoxides A–F (1–6)

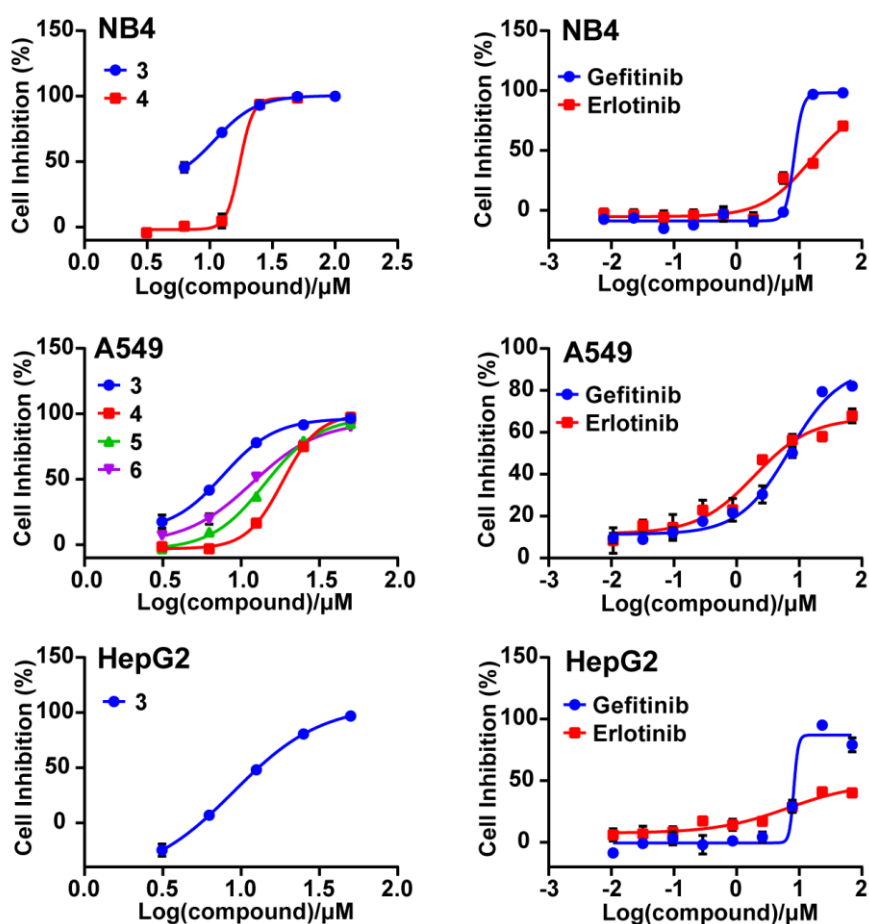

**Figure S1.** Racemic mixtures 3–6 for cytotoxic effects against leukemia NB4 cells, non-small cell lung cancer (NSCLC) A549 cells, and hepatocarcinoma Hep-G2 cells.

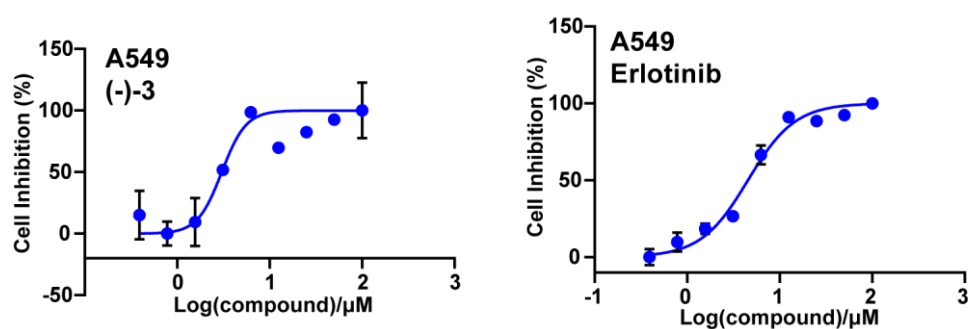

**Figure S2.** Purified enantiomer (–)-3 for cytotoxic effects against non-small cell lung cancer (NSCLC) A549 cells.

## 1.2 X-ray crystallographic analysis for ocellatuperoxide A (1)

**Table S1.** X-ray crystallographic data for **1**

|                                             |                                                                |
|---------------------------------------------|----------------------------------------------------------------|
| Identification code                         | 0922_0m                                                        |
| Empirical formula                           | C <sub>21</sub> H <sub>30</sub> O <sub>5</sub>                 |
| Formula weight                              | 362.45                                                         |
| Temperature/K                               | 170.0                                                          |
| Crystal system                              | triclinic                                                      |
| Space group                                 | P-1                                                            |
| a/Å                                         | 8.2485(7)                                                      |
| b/Å                                         | 9.1351(8)                                                      |
| c/Å                                         | 13.5764(12)                                                    |
| $\alpha$ /°                                 | 88.507(3)                                                      |
| $\beta$ /°                                  | 89.533(3)                                                      |
| $\gamma$ /°                                 | 80.032(2)                                                      |
| Volume/Å <sup>3</sup>                       | 1007.20(15)                                                    |
| Z                                           | 2                                                              |
| $\rho_{\text{calc}}/\text{cm}^3$            | 1.195                                                          |
| $\mu/\text{mm}^{-1}$                        | 0.084                                                          |
| F(000)                                      | 392.0                                                          |
| Crystal size/mm <sup>3</sup>                | 0.12 × 0.08 × 0.05                                             |
| Radiation                                   | MoK $\alpha$ ( $\lambda$ = 0.71073)                            |
| 2 $\Theta$ range for data collection/°      | 4.528 to 52.784                                                |
| Index ranges                                | -10 ≤ h ≤ 10, -11 ≤ k ≤ 11, -16 ≤ l ≤ 16                       |
| Reflections collected                       | 11528                                                          |
| Independent reflections                     | 4090 [ $R_{\text{int}}$ = 0.0833, $R_{\text{sigma}}$ = 0.1134] |
| Data/restraints/parameters                  | 4090/0/243                                                     |
| Goodness-of-fit on F <sup>2</sup>           | 1.043                                                          |
| Final R indexes [ $I \geq 2\sigma(I)$ ]     | $R_1$ = 0.0686, $wR_2$ = 0.1227                                |
| Final R indexes [all data]                  | $R_1$ = 0.1658, $wR_2$ = 0.1647                                |
| Largest diff. peak/hole / e Å <sup>-3</sup> | 0.21/-0.26                                                     |

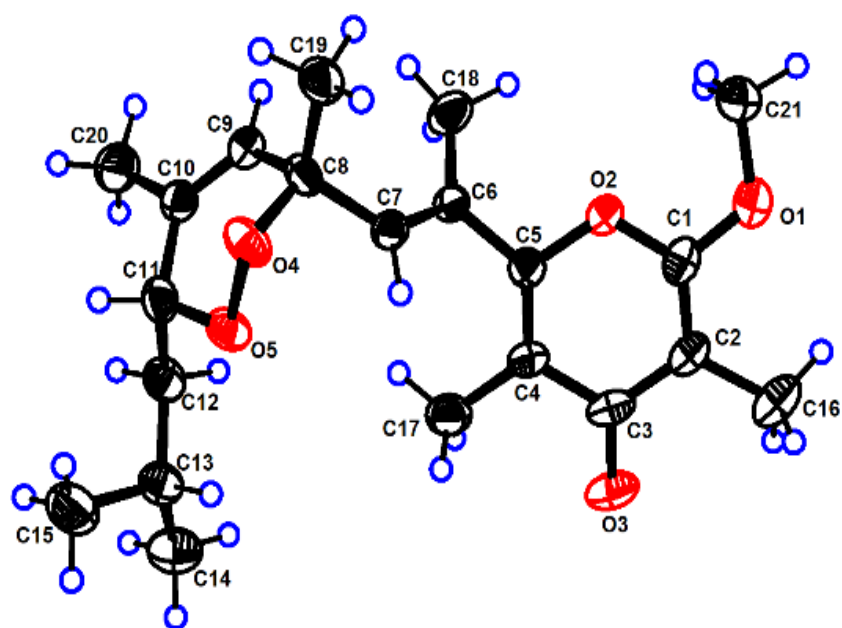

**Figure S3.** X-ray Crystallographic structure of compound **1**

**Table S2.** The detailed tables containing 1D NMR data and 2D correlations of compounds **1–6**.

| <b>1</b> |                                        |                           |                                  |                          |                    |
|----------|----------------------------------------|---------------------------|----------------------------------|--------------------------|--------------------|
| No.      | $\delta_{\text{H}}$ (mult., $J$ in Hz) | $\delta_{\text{C}}$ mult. | $^1\text{H}$ - $^1\text{H}$ COSY | HMBC (H $\rightarrow$ C) | NOESY              |
| 1        | -                                      | 162.0, s                  | -                                | -                        | -                  |
| 2        | -                                      | 99.6, s                   | -                                | -                        | -                  |
| 3        | -                                      | 181.6, s                  | -                                | -                        | -                  |
| 4        | -                                      | 118.1, s                  | -                                | -                        | -                  |
| 5        | -                                      | 158.5, s                  | -                                | -                        | -                  |
| 6        | -                                      | 129.0, s                  | -                                | -                        | -                  |
| 7        | 5.80 (s)                               | 138.9, d                  | 18                               | 5, 8, 9, 18              | 9, 19              |
| 8        | -                                      | 79.8, s                   | -                                | -                        | -                  |
| 9        | 5.67 (s)                               | 125.5, d                  | 20                               | 8, 11, 20                | 7, 18, 19, 20      |
| 10       | -                                      | 134.5, s                  | -                                | -                        | -                  |
| 11       | 4.45 (d, 9.4)                          | 79.3, d                   | 12                               | No detected              | 12, 13, 14, 15, 20 |
| 12       | 1.54 (m)                               | 39.5, t                   | 11, 13                           |                          | 11, 13, 14, 15     |
| 13       | 1.30 (m)                               | 24.7, d                   | 12, 14, 15                       |                          | 12, 14, 15         |
| 14       | 1.45 (m)                               | 21.9, q                   | 13                               | 12, 13, 15               | 12, 13, 15         |
| 15       | 0.94 (d, 6.6)                          | 23.9, q                   | 13                               | 12, 13, 15               | 12, 13, 14         |
| 16       | 0.93 (d, 6.6)                          | 7.0, q                    | -                                | 1, 2, 3                  |                    |
| 17       | 1.86 (s)                               | 11.9, q                   | -                                | 3, 4, 5                  |                    |
| 18       | 1.98 (s)                               | 16.0, q                   | -                                | 5, 6, 7                  |                    |
| 19       | 2.05 (s)                               | 24.7, q                   | -                                | 7, 8, 9                  | 7, 9               |
| 20       | 1.45 (s)                               | 18.5, q                   | -                                | 9, 10, 11                | 9, 11              |
| 21       | 1.73 (s)                               | 55.4, q                   | -                                | 1                        |                    |
| 21       | 3.95 (s)                               |                           |                                  |                          |                    |

| <b>2</b> |                                        |                           |                                  |                          |       |
|----------|----------------------------------------|---------------------------|----------------------------------|--------------------------|-------|
| No.      | $\delta_{\text{H}}$ (mult., $J$ in Hz) | $\delta_{\text{C}}$ mult. | $^1\text{H}$ - $^1\text{H}$ COSY | HMBC (H $\rightarrow$ C) | NOESY |
| 1        | -                                      | 163.0, s                  | -                                | -                        | -     |

|    |               |          |            |             |                    |
|----|---------------|----------|------------|-------------|--------------------|
| 2  | -             | 100.4, s | -          | -           | -                  |
| 3  | -             | 180.7, s | -          | -           | -                  |
| 4  | -             | 118.7, s | -          | -           | -                  |
| 5  | -             | 156.2, s | -          | -           | -                  |
| 6  | -             | 128.3, s | -          | -           | -                  |
| 7  | 5.83 (s)      | 137.2, d | 18         | 5, 9, 18    | 18, 19             |
| 8  | -             | 79.4, s  | -          | -           | -                  |
| 9  | 5.27 (s)      | 124.2, d | 20         | 11, 19, 20  | 19, 20             |
| 10 | -             | 134.5, s | -          | -           | -                  |
| 11 | 4.34 (br s)   | 79.2, d  | 12         | No detected | 12, 14, 15, 20     |
| 12 | 1.30 (m)      | 39.4, t  | 11, 13     |             | 11, 13, 14, 15, 20 |
| 13 | 1.76 (m)      | 24.8, d  | 12, 14, 15 |             | 12, 14, 15         |
| 14 | 0.90 (d, 6.6) | 21.6, q  | 13         | 12, 13, 15  | 11, 12, 13, 15     |
| 15 | 0.90 (d, 6.6) | 23.8, q  | 13         | 12, 13, 15  | 11, 12, 13, 14     |
| 16 | 1.91 (s)      | 7.3, q   | -          | 1, 2, 3     |                    |
| 17 | 1.89 (s)      | 11.3, q  | -          | 3, 4, 5     |                    |
| 18 | 1.96 (s)      | 23.8, q  | -          | 5, 6, 7     | 7                  |
| 19 | 1.26 (s)      | 24.8, q  | -          | 7, 8, 9     | 7, 9               |
| 20 | 1.54 (s)      | 18.3, q  | -          | 9, 10, 11   | 9, 11              |
| 21 | 3.96 (s)      | 55.9, q  | -          | 1           |                    |

| No. | 3                                      |                           |                                  |                          |            |
|-----|----------------------------------------|---------------------------|----------------------------------|--------------------------|------------|
|     | $\delta_{\text{H}}$ (mult., $J$ in Hz) | $\delta_{\text{C}}$ mult. | $^1\text{H}$ - $^1\text{H}$ COSY | HMBC (H $\rightarrow$ C) | NOESY      |
| 1   | -                                      | 162.5, s                  | -                                | -                        | -          |
| 2   | -                                      | 100.6, s                  | -                                | -                        | -          |
| 3   | -                                      | 180.9, s                  | -                                | -                        | -          |
| 4   | -                                      | 119.2, s                  | -                                | -                        | -          |
| 5   | -                                      | 155.4, s                  | -                                | -                        | -          |
| 6   | -                                      | 130.4, s                  | -                                | -                        | -          |
| 7   | 5.77 (s)                               | 136.2, d                  | 18                               | 5, 9, 18                 | 18, 19     |
| 8   | -                                      | 78.7, s                   | -                                | -                        | -          |
| 9   | 5.38 (s)                               | 125.3, d                  | 20                               | 7, 11, 20                | 20         |
| 10  | -                                      | 132.3, s                  | -                                | -                        | -          |
| 11  | 4.33 (s)                               | 86.9, d                   |                                  | 9, 10, 13, 21            | 13, 20, 21 |
| 12  | -                                      | 130.4, s                  | -                                | -                        | -          |
| 13  | 5.38 (ov)                              | 135.6, d                  | 14                               | 11, 15, 21               | 11, 14     |
| 14  | 2.05 (m)                               | 21.4, t                   | 13, 15                           | 12, 13, 15               | 15, 21     |
| 15  | 0.95 (t, 7.5)                          | 13.9, q                   | 14                               | 13, 14                   | 14         |
| 16  | 1.87 (s)                               | 7.0, q                    | -                                | 1, 2, 3                  |            |
| 17  | 1.87 (s)                               | 11.0, q                   | -                                | 3, 4, 5                  |            |
| 18  | 1.96 (s)                               | 23.7, q                   | -                                | 5, 6, 7                  | 7          |
| 19  | 1.31 (s)                               | 25.0, q                   | -                                | 7, 8, 9                  | 7, 9       |
| 20  | 1.41 (s)                               | 18.8, q                   | -                                | 9, 10, 11                | 9, 11      |
| 21  | 1.56 (s)                               | 13.0, q                   | -                                | 11, 12, 13               | 14         |
| 22  | 3.95 (s)                               | 55.7, q                   | -                                | 1                        |            |

| No. | 4                                      |                           |                                  |                          |        |
|-----|----------------------------------------|---------------------------|----------------------------------|--------------------------|--------|
|     | $\delta_{\text{H}}$ (mult., $J$ in Hz) | $\delta_{\text{C}}$ mult. | $^1\text{H}$ - $^1\text{H}$ COSY | HMBC (H $\rightarrow$ C) | NOESY  |
| 1   | -                                      | 162.7, s                  | -                                | -                        | -      |
| 2   | -                                      | 100.4, s                  | -                                | -                        | -      |
| 3   | -                                      | 181.1, s                  | -                                | -                        | -      |
| 4   | -                                      | 119.0, s                  | -                                | -                        | -      |
| 5   | -                                      | 155.4, s                  | -                                | -                        | -      |
| 6   | -                                      | 126.6, s                  | -                                | -                        | -      |
| 7   | 6.09 (s)                               | 138.6, d                  | 18                               | 5, 9, 18, 19             | 18, 19 |
| 8   | -                                      | 79.4, s                   | -                                | -                        | -      |
| 9   | 5.44 (s)                               | 126.2, d                  | 20                               | 7, 11, 19, 20            | 19, 20 |
| 10  | -                                      | 132.7, s                  | -                                | -                        | -      |
| 11  | 4.75 (s)                               | 87.4, d                   |                                  | 9, 10, 13, 20, 21        | 13, 20 |
| 12  | -                                      | 128.9, s                  | -                                | -                        | -      |

|    |               |          |        |            |            |
|----|---------------|----------|--------|------------|------------|
| 13 | 5.60 (t, 7.2) | 137.3, d | 14     | 11, 21     | 11, 14, 15 |
| 14 | 2.06 (m)      | 21.4, t  | 13, 15 |            | 13, 15, 21 |
|    | 2.06 (m)      |          |        |            |            |
| 15 | 0.97 (t, 7.5) | 13.8, q  | 14     | 13, 14     | 13, 14     |
| 16 | 1.89 (s)      | 7.1, q   | -      | 1, 2, 3    |            |
| 17 | 1.89 (s)      | 11.7, q  | -      | 3, 4, 5    |            |
| 18 | 1.95 (s)      | 23.6, q  | -      | 5, 6, 7    | 7          |
| 19 | 1.17 (s)      | 23.9, q  | -      | 7, 8, 9    | 7, 9       |
| 20 | 1.49 (s)      | 18.0, q  | -      | 9, 10, 11  | 9, 11      |
| 21 | 1.47 (s)      | 11.6, q  | -      | 11, 12, 13 | 14         |
| 22 | 3.92 (s)      | 55.7, q  | -      | 1          |            |

| No. | 5                             |                  |                    |                          |            |
|-----|-------------------------------|------------------|--------------------|--------------------------|------------|
|     | $\delta_H$ (mult., $J$ in Hz) | $\delta_C$ mult. | $^1H$ - $^1H$ COSY | HMBC (H $\rightarrow$ C) | NOESY      |
| 1   | -                             | 162.1, s         | -                  | -                        | -          |
| 2   | -                             | 99.6, s          | -                  | -                        | -          |
| 3   | -                             | 181.7, s         | -                  | -                        | -          |
| 4   | -                             | 117.9, s         | -                  | -                        | -          |
| 5   | -                             | 158.7, s         | -                  | -                        | -          |
| 6   | -                             | 127.4, s         | -                  | -                        | -          |
| 7   | 5.91 (s)                      | 139.8, d         | 18                 | 5, 18                    | 9, 19      |
| 8   | -                             | 79.9, s          | -                  | -                        | -          |
| 9   | 5.85 (s)                      | 126.8, d         | 20                 | 8, 11, 20                | 7, 19, 20  |
| 10  | -                             | 133.1, s         | -                  | -                        | -          |
| 11  | 4.85 (s)                      | 87.5, d          | -                  | 13                       | 13         |
| 12  | -                             | 129.0, s         | -                  | -                        | -          |
| 13  | 5.63 (t, 7.2)                 | 137.4, d         | 14                 | 11, 21                   | 11, 14, 15 |
|     | 2.06 (m)                      |                  |                    |                          | 13, 15, 21 |
| 14  | 2.06 (m)                      | 21.4, t          | 13, 15             | 12, 13, 15               |            |
| 15  | 0.98 (t, 7.5)                 | 13.8, q          | 14                 | 13, 14                   | 13, 14     |
| 16  | 1.85 (s)                      | 7.0, q           | -                  | 1, 2, 3                  |            |
| 17  | 1.98 (s)                      | 11.8, q          | -                  | 3, 4, 5                  |            |
| 18  | 2.08 (s)                      | 15.9, q          | -                  | 5, 6, 7                  | 9          |
| 19  | 1.38 (s)                      | 24.1, q          | -                  | 7, 8, 9                  | 9          |
| 20  | 1.63 (s)                      | 18.1, q          | -                  | 9, 10, 11                | 9          |
| 21  | 1.45 (s)                      | 11.5, q          | -                  | 11, 12, 13               | 14         |
| 22  | 3.94 (s)                      | 55.7, q          | -                  | 1                        |            |

| No. | 6                             |                  |                    |                          |            |
|-----|-------------------------------|------------------|--------------------|--------------------------|------------|
|     | $\delta_H$ (mult., $J$ in Hz) | $\delta_C$ mult. | $^1H$ - $^1H$ COSY | HMBC (H $\rightarrow$ C) | NOESY      |
| 1   | -                             | 162.1, s         | -                  | -                        | -          |
| 2   | -                             | 99.6, s          | -                  | -                        | -          |
| 3   | -                             | 181.6, s         | -                  | -                        | -          |
| 4   | -                             | 118.1, s         | -                  | -                        | -          |
| 5   | -                             | 158.3, s         | -                  | -                        | -          |
| 6   | -                             | 130.5, s         | -                  | -                        | -          |
| 7   | 5.72 (s)                      | 137.6, d         | 18                 | 5, 8, 18                 | 9, 17, 19  |
| 8   | -                             | 79.5, s          | -                  | -                        | -          |
| 9   | 5.77 (s)                      | 126.8, d         | 20                 | 8, 11, 20                | 7, 18, 19  |
| 10  | -                             | 132.4, s         | -                  | -                        | -          |
| 11  | 4.64 (s)                      | 86.2, d          | -                  | No detected              | 13, 20     |
| 12  | -                             | 129.8, s         | -                  | -                        | -          |
| 13  | 5.54 (t, 7.4)                 | 136.2, d         | 14                 | 14                       | 11, 14, 15 |
|     | 2.10 (m)                      |                  |                    |                          | 13, 15, 21 |
| 14  | 2.10 (m)                      | 21.4, t          | 13, 15             | 13, 15                   |            |
| 15  | 0.99 (t, 7.5)                 | 13.9, q          | 14                 | 13                       | 13, 14     |
| 16  | 1.85 (s)                      | 7.0, q           | -                  | 1, 2, 3                  |            |
| 17  | 1.98 (s)                      | 12.0, q          | -                  | 3, 4, 5                  | 7          |
| 18  | 2.06 (s)                      | 16.1, q          | -                  | 5, 6, 7                  |            |
| 19  | 1.52 (s)                      | 25.3, q          | -                  | 7, 8, 9                  | 7, 9       |
| 20  | 1.65 (s)                      | 18.7, q          | -                  | 9, 10, 11                | 9          |
| 21  | 1.63 (s)                      | 12.8, q          | -                  | 11, 12, 13               | 14         |

|    |          |         |   |   |
|----|----------|---------|---|---|
| 22 | 3.95 (s) | 55.5, q | - | 1 |
|----|----------|---------|---|---|

---



### 1.3 Chiral HPLC analysis chromatography of ocellatuperoxides A–F (1–6)

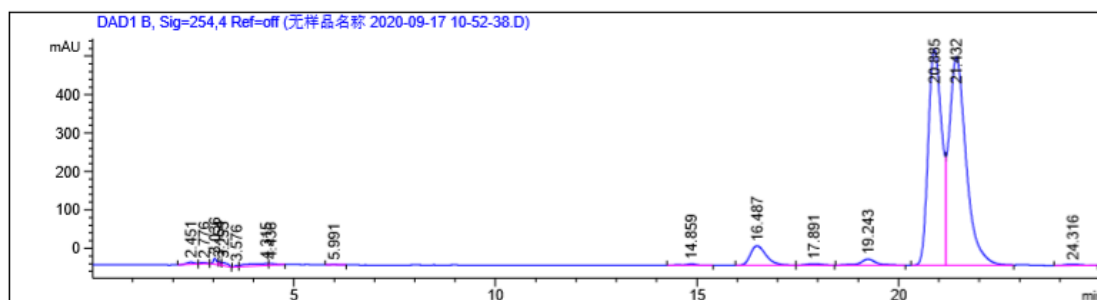

**Figure S4.** Chiral HPLC analysis chromatography of compounds (±)-**1**. Isocratic elution method with 53% water/47% MeOH, 1.0 mL/min. (+)-**1**,  $t_R$  = 20.9 min, (–)-**1**,  $t_R$  = 21.4 min.

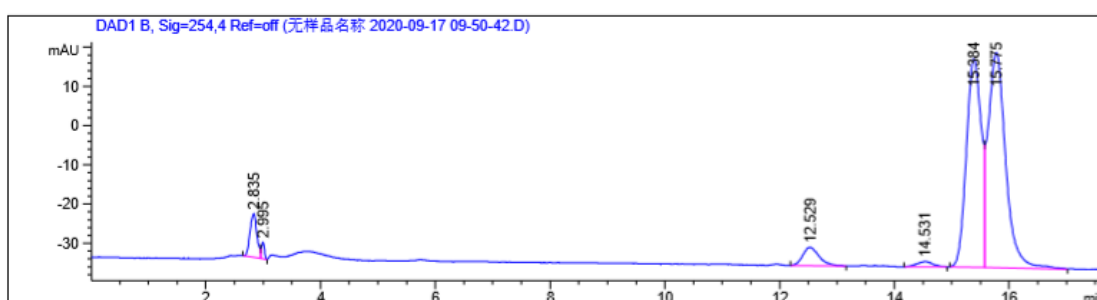

**Figure S5.** Chiral HPLC analysis chromatography of compounds (±)-**2**. Isocratic elution method with 50% water/50% MeOH, 1.0 mL/min. (+)-**2**,  $t_R$  = 15.4 min, (–)-**2**,  $t_R$  = 15.8 min.

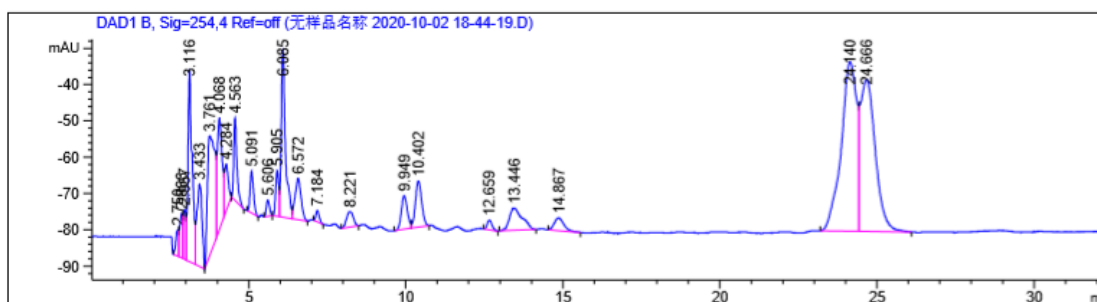

**Figure S6.** Chiral HPLC analysis chromatography of compounds (±)-**3**. Isocratic elution method with 40% water/60% MeOH, 1.0 mL/min. (+)-**3**,  $t_R$  = 24.1 min, (–)-**3**,  $t_R$  = 24.7 min.

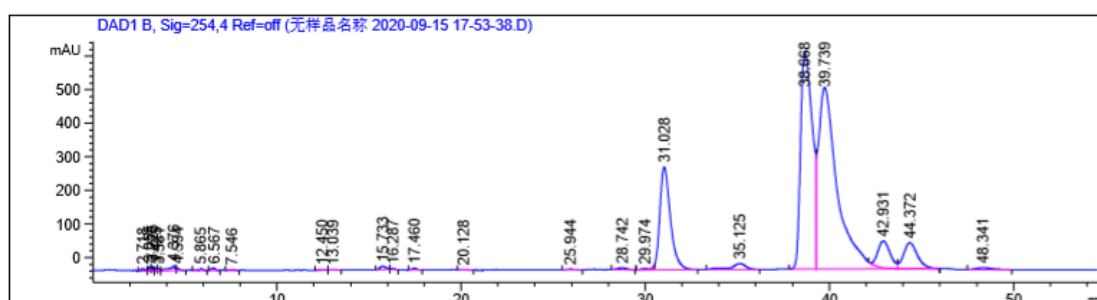

**Figure S7.** Chiral HPLC analysis chromatography of compounds ( $\pm$ )-**4**. Isocratic elution method with 55% water/45% MeOH, 1.0 mL/min. (+)-**4**,  $t_R$ = 38.7 min, (-)-**4**,  $t_R$ = 39.7 min.

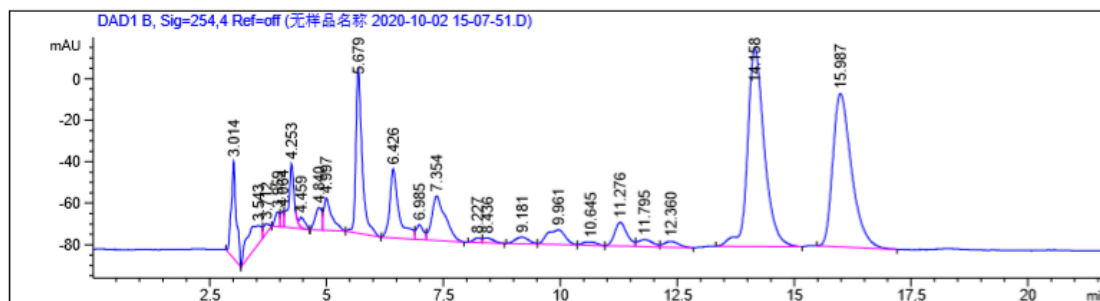

**Figure S8.** Chiral HPLC analysis chromatography of compounds ( $\pm$ )-**5**. Isocratic elution method with 20% water/80% MeOH, 1.0 mL/min. (+)-**5**,  $t_R$ = 14.2 min, (-)-**5**,  $t_R$ = 16.0 min.

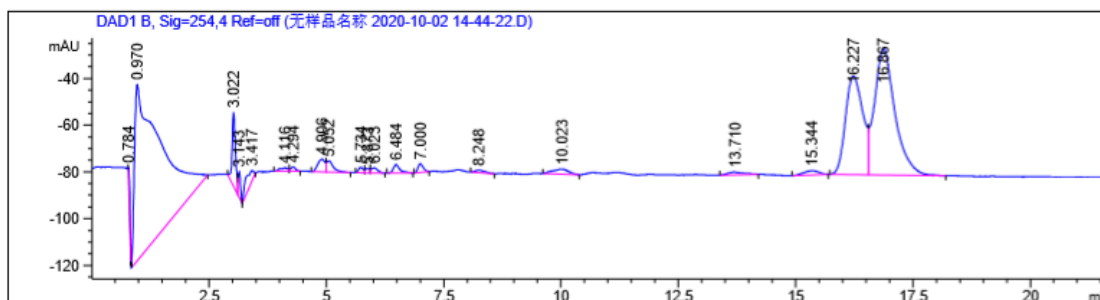

**Figure S9.** Chiral HPLC analysis chromatography of compounds ( $\pm$ )-**6**. Isocratic elution method with 20% water/80% MeOH, 1.0 mL/min. (+)-**6**,  $t_R$ = 16.2 min, (-)-**6**,  $t_R$ = 16.9 min.

## 1.4 Specific optical rotations of ocellatuperoxides A–F (1–6)

LotID : 001-chiral-A  
Set Temperature : OFF  
Temp Corr : OFF

| n    | Average      | Std.Dev.    | Maximum | Minimum |          |     |        |       |       |         |
|------|--------------|-------------|---------|---------|----------|-----|--------|-------|-------|---------|
| 6    | 50.000       | 5.7735      | 60.000  | 40.000  |          |     |        |       |       |         |
| S.No | Sample ID    | Time        | Result  | Scale   | OR ° Arc | WLG | Lg.mm  | Conc. | Temp. | Comment |
| 1    | 001-chiral-A | 09:18:21 AM | 40.000  | SR      | 0.008    | 589 | 100.00 | 0.020 | 18.4  |         |
| 2    | 001-chiral-A | 09:18:35 AM | 50.000  | SR      | 0.010    | 589 | 100.00 | 0.020 | 18.4  |         |
| 3    | 001-chiral-A | 09:18:41 AM | 50.000  | SR      | 0.010    | 589 | 100.00 | 0.020 | 18.4  |         |
| 4    | 001-chiral-A | 09:18:47 AM | 50.000  | SR      | 0.010    | 589 | 100.00 | 0.020 | 18.4  |         |
| 5    | 001-chiral-A | 09:18:54 AM | 50.000  | SR      | 0.010    | 589 | 100.00 | 0.020 | 18.4  |         |
| 6    | 001-chiral-A | 09:19:00 AM | 60.000  | SR      | 0.012    | 589 | 100.00 | 0.020 | 18.4  |         |

**Figure S10.** Specific optical rotation of (+)-1.

LotID : 001-chiral-B  
Set Temperature : OFF  
Temp Corr : OFF

| n    | Average      | Std.Dev.    | Maximum | Minimum |          |     |        |       |       |         |
|------|--------------|-------------|---------|---------|----------|-----|--------|-------|-------|---------|
| 6    | -37.500      | 3.8188      | -35.000 | -45.000 |          |     |        |       |       |         |
| S.No | Sample ID    | Time        | Result  | Scale   | OR ° Arc | WLG | Lg.mm  | Conc. | Temp. | Comment |
| 1    | 001-chiral-B | 09:24:46 AM | -45.000 | SR      | -0.009   | 589 | 100.00 | 0.020 | 18.5  |         |
| 2    | 001-chiral-B | 09:24:52 AM | -40.000 | SR      | -0.008   | 589 | 100.00 | 0.020 | 18.5  |         |
| 3    | 001-chiral-B | 09:24:58 AM | -35.000 | SR      | -0.007   | 589 | 100.00 | 0.020 | 18.5  |         |
| 4    | 001-chiral-B | 09:25:05 AM | -35.000 | SR      | -0.007   | 589 | 100.00 | 0.020 | 18.5  |         |
| 5    | 001-chiral-B | 09:25:11 AM | -35.000 | SR      | -0.007   | 589 | 100.00 | 0.020 | 18.5  |         |
| 6    | 001-chiral-B | 09:25:16 AM | -35.000 | SR      | -0.007   | 589 | 100.00 | 0.020 | 18.5  |         |

**Figure S11.** Specific optical rotation of (–)-1.

LotID : 002-chiral-A  
Set Temperature : OFF  
Temp Corr : OFF

| n    | Average      | Std.Dev.    | Maximum | Minimum |          |     |        |       |       |         |
|------|--------------|-------------|---------|---------|----------|-----|--------|-------|-------|---------|
| 6    | 64.722       | 0.6213      | 65.000  | 63.333  |          |     |        |       |       |         |
| S.No | Sample ID    | Time        | Result  | Scale   | OR ° Arc | WLG | Lg.mm  | Conc. | Temp. | Comment |
| 1    | 002-chiral-A | 08:18:01 PM | 63.333  | SR      | 0.038    | 589 | 100.00 | 0.060 | 18.6  |         |
| 2    | 002-chiral-A | 08:18:07 PM | 65.000  | SR      | 0.039    | 589 | 100.00 | 0.060 | 18.6  |         |
| 3    | 002-chiral-A | 08:18:13 PM | 65.000  | SR      | 0.039    | 589 | 100.00 | 0.060 | 18.6  |         |
| 4    | 002-chiral-A | 08:18:18 PM | 65.000  | SR      | 0.039    | 589 | 100.00 | 0.060 | 18.6  |         |
| 5    | 002-chiral-A | 08:18:24 PM | 65.000  | SR      | 0.039    | 589 | 100.00 | 0.060 | 18.6  |         |
| 6    | 002-chiral-A | 08:18:31 PM | 65.000  | SR      | 0.039    | 589 | 100.00 | 0.060 | 18.6  |         |

**Figure S12.** Specific optical rotation of (+)-2.

LotID : 002-chiral-B  
Set Temperature : OFF  
Temp Corr : OFF

| n    | Average      | Std.Dev.    | Maximum | Minimum |          |     |        |       |       |         |
|------|--------------|-------------|---------|---------|----------|-----|--------|-------|-------|---------|
| 6    | -57.143      | 0.0000      | -57.143 | -57.143 |          |     |        |       |       |         |
| S.No | Sample ID    | Time        | Result  | Scale   | OR ° Arc | WLG | Lg.mm  | Conc. | Temp. | Comment |
| 1    | 002-chiral-B | 08:10:45 PM | -57.143 | SR      | -0.040   | 589 | 100.00 | 0.070 | 18.6  |         |
| 2    | 002-chiral-B | 08:10:51 PM | -57.143 | SR      | -0.040   | 589 | 100.00 | 0.070 | 18.6  |         |
| 3    | 002-chiral-B | 08:10:57 PM | -57.143 | SR      | -0.040   | 589 | 100.00 | 0.070 | 18.6  |         |
| 4    | 002-chiral-B | 08:11:03 PM | -57.143 | SR      | -0.040   | 589 | 100.00 | 0.070 | 18.6  |         |
| 5    | 002-chiral-B | 08:11:09 PM | -57.143 | SR      | -0.040   | 589 | 100.00 | 0.070 | 18.6  |         |
| 6    | 002-chiral-B | 08:11:15 PM | -57.143 | SR      | -0.040   | 589 | 100.00 | 0.070 | 18.6  |         |

**Figure S13.** Specific optical rotation of (–)-2.

LotID : 003-chiral-A  
Set Temperature : OFF  
Temp Corr : OFF

| n    | Average      | Std.Dev.    | Maximum | Minimum |          |     |        |       |       |         |
|------|--------------|-------------|---------|---------|----------|-----|--------|-------|-------|---------|
| 6    | 21.833       | 1.6750      | 23.000  | 19.000  |          |     |        |       |       |         |
| S.No | Sample ID    | Time        | Result  | Scale   | OR ° Arc | WLG | Lg.mm  | Conc. | Temp. | Comment |
| 1    | 003-chiral-A | 07:55:30 PM | 19.000  | SR      | 0.019    | 589 | 100.00 | 0.100 | 18.9  |         |
| 2    | 003-chiral-A | 07:55:36 PM | 20.000  | SR      | 0.020    | 589 | 100.00 | 0.100 | 18.9  |         |
| 3    | 003-chiral-A | 07:55:44 PM | 23.000  | SR      | 0.023    | 589 | 100.00 | 0.100 | 18.9  |         |
| 4    | 003-chiral-A | 07:55:50 PM | 23.000  | SR      | 0.023    | 589 | 100.00 | 0.100 | 18.9  |         |
| 5    | 003-chiral-A | 07:55:56 PM | 23.000  | SR      | 0.023    | 589 | 100.00 | 0.100 | 18.9  |         |
| 6    | 003-chiral-A | 07:56:02 PM | 23.000  | SR      | 0.023    | 589 | 100.00 | 0.100 | 18.9  |         |

**Figure S14.** Specific optical rotation of (+)-3.

LotID : 003-chiral-B  
Set Temperature : OFF  
Temp Corr : OFF

| n    | Average      | Std.Dev.    | Maximum | Minimum |          |     |        |       |       |         |
|------|--------------|-------------|---------|---------|----------|-----|--------|-------|-------|---------|
| 6    | -16.500      | 0.5000      | -16.000 | -17.000 |          |     |        |       |       |         |
| S.No | Sample ID    | Time        | Result  | Scale   | OR ° Arc | WLG | Lg.mm  | Conc. | Temp. | Comment |
| 1    | 003-chiral-B | 08:01:17 PM | -17.000 | SR      | -0.017   | 589 | 100.00 | 0.100 | 19.1  |         |
| 2    | 003-chiral-B | 08:01:23 PM | -17.000 | SR      | -0.017   | 589 | 100.00 | 0.100 | 19.1  |         |
| 3    | 003-chiral-B | 08:01:29 PM | -17.000 | SR      | -0.017   | 589 | 100.00 | 0.100 | 19.1  |         |
| 4    | 003-chiral-B | 08:01:35 PM | -16.000 | SR      | -0.016   | 589 | 100.00 | 0.100 | 19.1  |         |
| 5    | 003-chiral-B | 08:01:41 PM | -16.000 | SR      | -0.016   | 589 | 100.00 | 0.100 | 19.1  |         |
| 6    | 003-chiral-B | 08:01:47 PM | -16.000 | SR      | -0.016   | 589 | 100.00 | 0.100 | 19.1  |         |

**Figure S15.** Specific optical rotation of (–)-3.

LotID : 4-chiral-A  
Set Temperature : OFF  
Temp Corr : OFF

| n    | Average    | Std.Dev.    | Maximum | Minimum |          |     |        |       |       |         |
|------|------------|-------------|---------|---------|----------|-----|--------|-------|-------|---------|
| 6    | 18.000     | 1.1547      | 20.000  | 16.000  |          |     |        |       |       |         |
| S.No | Sample ID  | Time        | Result  | Scale   | OR ° Arc | WLG | Lg.mm  | Conc. | Temp. | Comment |
| 1    | 4-chiral-A | 06:45:58 PM | 18.000  | SR      | 0.009    | 589 | 100.00 | 0.050 | 19.4  |         |
| 2    | 4-chiral-A | 06:46:04 PM | 16.000  | SR      | 0.008    | 589 | 100.00 | 0.050 | 19.4  |         |
| 3    | 4-chiral-A | 06:46:10 PM | 18.000  | SR      | 0.009    | 589 | 100.00 | 0.050 | 19.4  |         |
| 4    | 4-chiral-A | 06:46:16 PM | 18.000  | SR      | 0.009    | 589 | 100.00 | 0.050 | 19.4  |         |
| 5    | 4-chiral-A | 06:46:22 PM | 20.000  | SR      | 0.010    | 589 | 100.00 | 0.050 | 19.4  |         |
| 6    | 4-chiral-A | 06:46:28 PM | 18.000  | SR      | 0.009    | 589 | 100.00 | 0.050 | 19.4  |         |

**Figure S16.** Specific optical rotation of (+)-4.

LotID : 4-chiral-B  
Set Temperature : OFF  
Temp Corr : OFF

| n    | Average    | Std.Dev.    | Maximum | Minimum |          |     |        |       |       |         |
|------|------------|-------------|---------|---------|----------|-----|--------|-------|-------|---------|
| 6    | -18.572    | 1.6496      | -17.143 | -21.429 |          |     |        |       |       |         |
| S.No | Sample ID  | Time        | Result  | Scale   | OR ° Arc | WLG | Lg.mm  | Conc. | Temp. | Comment |
| 1    | 4-chiral-B | 06:51:35 PM | -21.429 | SR      | -0.015   | 589 | 100.00 | 0.070 | 19.5  |         |
| 2    | 4-chiral-B | 06:51:41 PM | -20.000 | SR      | -0.014   | 589 | 100.00 | 0.070 | 19.5  |         |
| 3    | 4-chiral-B | 06:51:47 PM | -18.571 | SR      | -0.013   | 589 | 100.00 | 0.070 | 19.5  |         |
| 4    | 4-chiral-B | 06:51:53 PM | -17.143 | SR      | -0.012   | 589 | 100.00 | 0.070 | 19.5  |         |
| 5    | 4-chiral-B | 06:51:58 PM | -17.143 | SR      | -0.012   | 589 | 100.00 | 0.070 | 19.5  |         |
| 6    | 4-chiral-B | 06:52:04 PM | -17.143 | SR      | -0.012   | 589 | 100.00 | 0.070 | 19.5  |         |

**Figure S17.** Specific optical rotation of (–)-4.

LotID : 005-chiral-A  
Set Temperature : OFF  
Temp Corr : OFF

| n    | Average      | Std.Dev.    | Maximum | Minimum |          |     |        |       |       |         |
|------|--------------|-------------|---------|---------|----------|-----|--------|-------|-------|---------|
| 6    | 50.625       | 0.6250      | 51.250  | 50.000  |          |     |        |       |       |         |
| S.No | Sample ID    | Time        | Result  | Scale   | OR ° Arc | WLG | Lg.mm  | Conc. | Temp. | Comment |
| 1    | 005-chiral-A | 08:52:47 PM | 50.000  | SR      | 0.040    | 589 | 100.00 | 0.080 | 18.9  |         |
| 2    | 005-chiral-A | 08:52:56 PM | 51.250  | SR      | 0.041    | 589 | 100.00 | 0.080 | 18.9  |         |
| 3    | 005-chiral-A | 08:53:02 PM | 51.250  | SR      | 0.041    | 589 | 100.00 | 0.080 | 18.9  |         |
| 4    | 005-chiral-A | 08:53:08 PM | 51.250  | SR      | 0.041    | 589 | 100.00 | 0.080 | 18.9  |         |
| 5    | 005-chiral-A | 08:53:14 PM | 50.000  | SR      | 0.040    | 589 | 100.00 | 0.080 | 18.9  |         |
| 6    | 005-chiral-A | 08:53:20 PM | 50.000  | SR      | 0.040    | 589 | 100.00 | 0.080 | 18.9  |         |

**Figure S18.** Specific optical rotation of (+)-5.

LotID : 005-chiral-B  
Set Temperature : OFF  
Temp Corr : OFF

| n    | Average      | Std.Dev.    | Maximum | Minimum |          |     |        |       |       |         |
|------|--------------|-------------|---------|---------|----------|-----|--------|-------|-------|---------|
| 6    | -56.667      | 4.7139      | -46.667 | -61.111 |          |     |        |       |       |         |
| S.No | Sample ID    | Time        | Result  | Scale   | OR ° Arc | WLG | Lg.mm  | Conc. | Temp. | Comment |
| 1    | 005-chiral-B | 08:46:03 PM | -46.667 | SR      | -0.042   | 589 | 100.00 | 0.090 | 19.1  |         |
| 2    | 005-chiral-B | 08:46:11 PM | -56.667 | SR      | -0.051   | 589 | 100.00 | 0.090 | 19.1  |         |
| 3    | 005-chiral-B | 08:46:21 PM | -60.000 | SR      | -0.054   | 589 | 100.00 | 0.090 | 19.1  |         |
| 4    | 005-chiral-B | 08:46:27 PM | -61.111 | SR      | -0.055   | 589 | 100.00 | 0.090 | 19.1  |         |
| 5    | 005-chiral-B | 08:46:33 PM | -57.778 | SR      | -0.052   | 589 | 100.00 | 0.090 | 19.1  |         |
| 6    | 005-chiral-B | 08:46:39 PM | -57.778 | SR      | -0.052   | 589 | 100.00 | 0.090 | 19.1  |         |

**Figure S19.** Specific optical rotation of (–)-5.

LotID : 006-chiral-A  
Set Temperature : OFF  
Temp Corr : OFF

| n    | Average      | Std.Dev.    | Maximum | Minimum |          |     |        |       |       |         |
|------|--------------|-------------|---------|---------|----------|-----|--------|-------|-------|---------|
| 6    | 9.833        | 1.0672      | 12.000  | 9.000   |          |     |        |       |       |         |
| S.No | Sample ID    | Time        | Result  | Scale   | OR ° Arc | WLG | Lg.mm  | Conc. | Temp. | Comment |
| 1    | 006-chiral-A | 09:02:12 PM | 12.000  | SR      | 0.012    | 589 | 100.00 | 0.100 | 18.8  |         |
| 2    | 006-chiral-A | 09:02:18 PM | 9.000   | SR      | 0.009    | 589 | 100.00 | 0.100 | 18.8  |         |
| 3    | 006-chiral-A | 09:02:24 PM | 9.000   | SR      | 0.009    | 589 | 100.00 | 0.100 | 18.8  |         |
| 4    | 006-chiral-A | 09:02:30 PM | 9.000   | SR      | 0.009    | 589 | 100.00 | 0.100 | 18.8  |         |
| 5    | 006-chiral-A | 09:02:36 PM | 10.000  | SR      | 0.010    | 589 | 100.00 | 0.100 | 18.8  |         |
| 6    | 006-chiral-A | 09:02:42 PM | 10.000  | SR      | 0.010    | 589 | 100.00 | 0.100 | 18.8  |         |

**Figure S20.** Specific optical rotation of (+)-6.

LotID : 006-chiral-B  
Set Temperature : OFF  
Temp Corr : OFF

| n    | Average      | Std.Dev.    | Maximum | Minimum |          |     |        |       |       |         |
|------|--------------|-------------|---------|---------|----------|-----|--------|-------|-------|---------|
| 6    | -20.167      | 2.7335      | -16.000 | -24.000 |          |     |        |       |       |         |
| S.No | Sample ID    | Time        | Result  | Scale   | OR ° Arc | WLG | Lg.mm  | Conc. | Temp. | Comment |
| 1    | 006-chiral-B | 09:11:09 PM | -22.000 | SR      | -0.022   | 589 | 100.00 | 0.100 | 18.8  |         |
| 2    | 006-chiral-B | 09:11:15 PM | -22.000 | SR      | -0.022   | 589 | 100.00 | 0.100 | 18.8  |         |
| 3    | 006-chiral-B | 09:11:21 PM | -24.000 | SR      | -0.024   | 589 | 100.00 | 0.100 | 18.8  |         |
| 4    | 006-chiral-B | 09:11:27 PM | -19.000 | SR      | -0.019   | 589 | 100.00 | 0.100 | 18.8  |         |
| 5    | 006-chiral-B | 09:11:33 PM | -18.000 | SR      | -0.018   | 589 | 100.00 | 0.100 | 18.9  |         |
| 6    | 006-chiral-B | 09:11:39 PM | -16.000 | SR      | -0.016   | 589 | 100.00 | 0.100 | 18.9  |         |

**Figure S21.** Specific optical rotation of (–)-6.

**1.5 NMR, HR-ESI-MS, IR, and UV spectra of ocellatuperoxide A (1)**

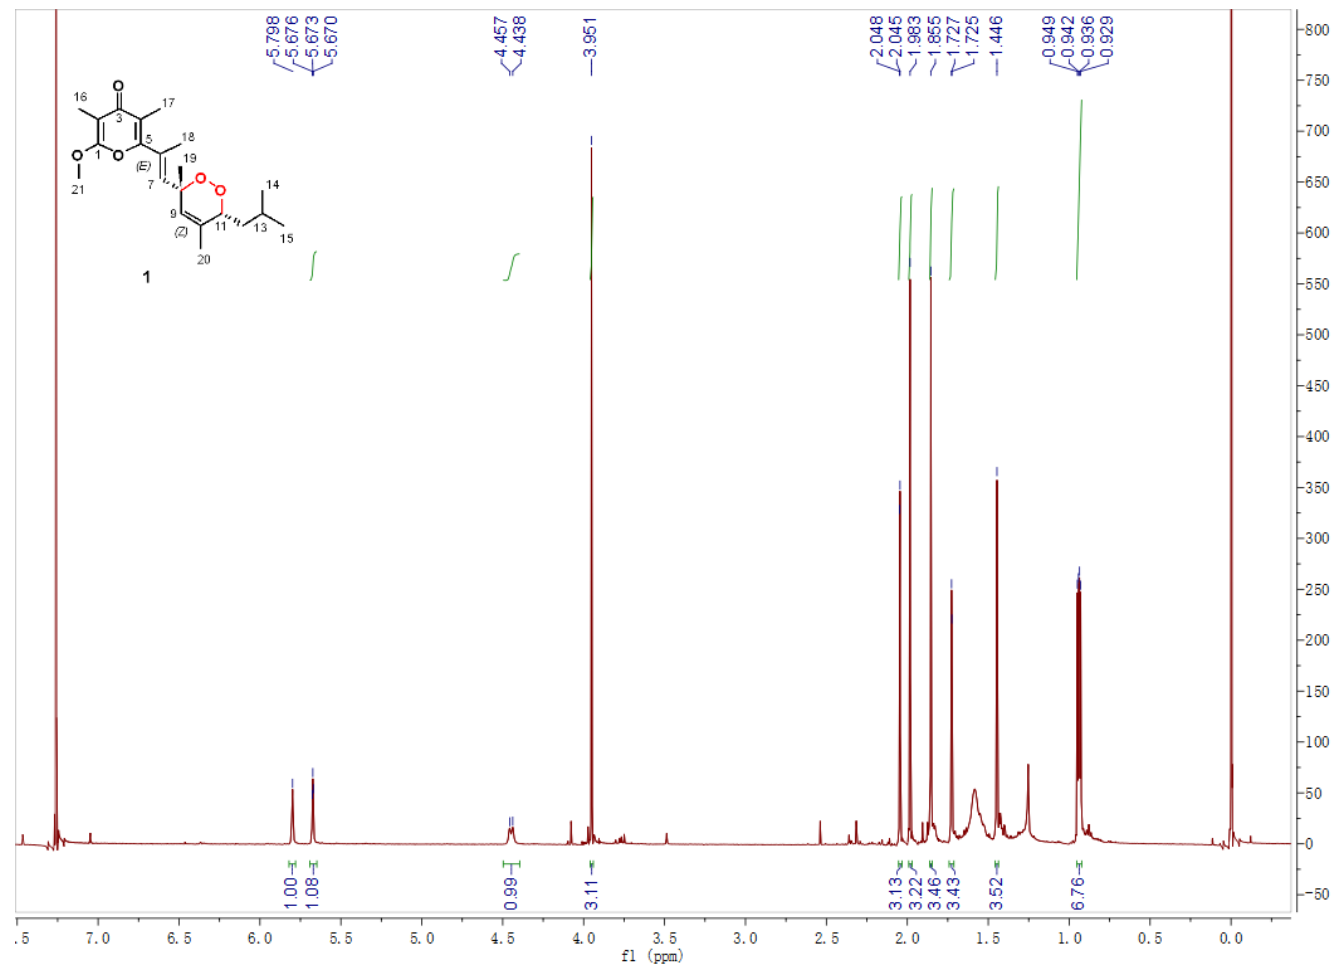

**Figure S22.**  $^1\text{H}$  NMR spectrum (600 MHz) of **1** in  $\text{CDCl}_3$ .

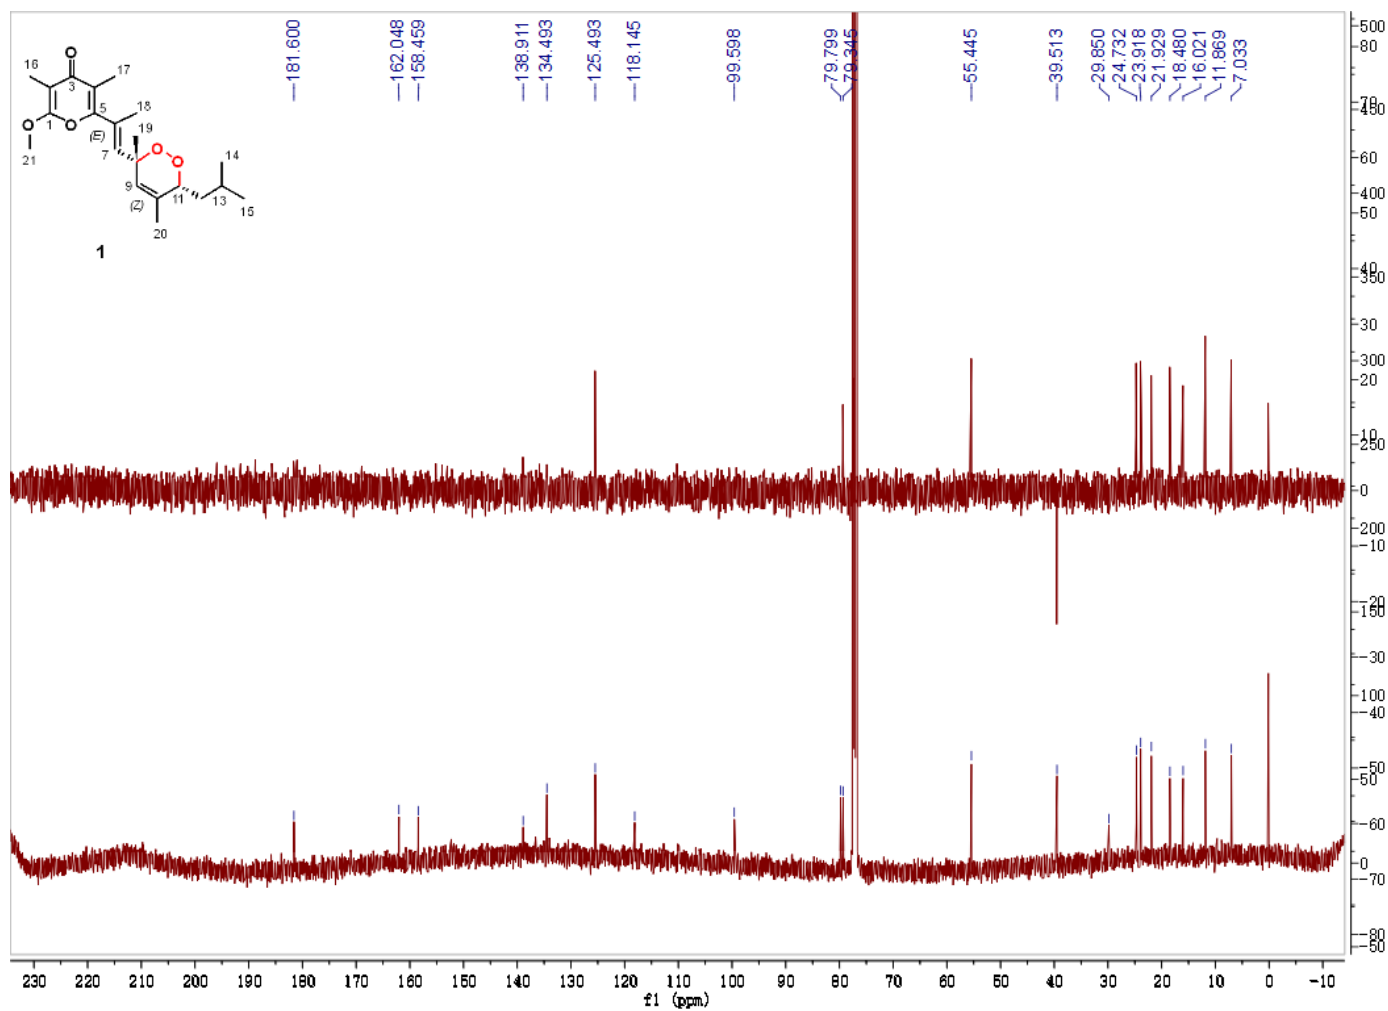

**Figure S23.**  $^{13}\text{C}$  NMR spectrum (150 MHz) of **1** in  $\text{CDCl}_3$ .



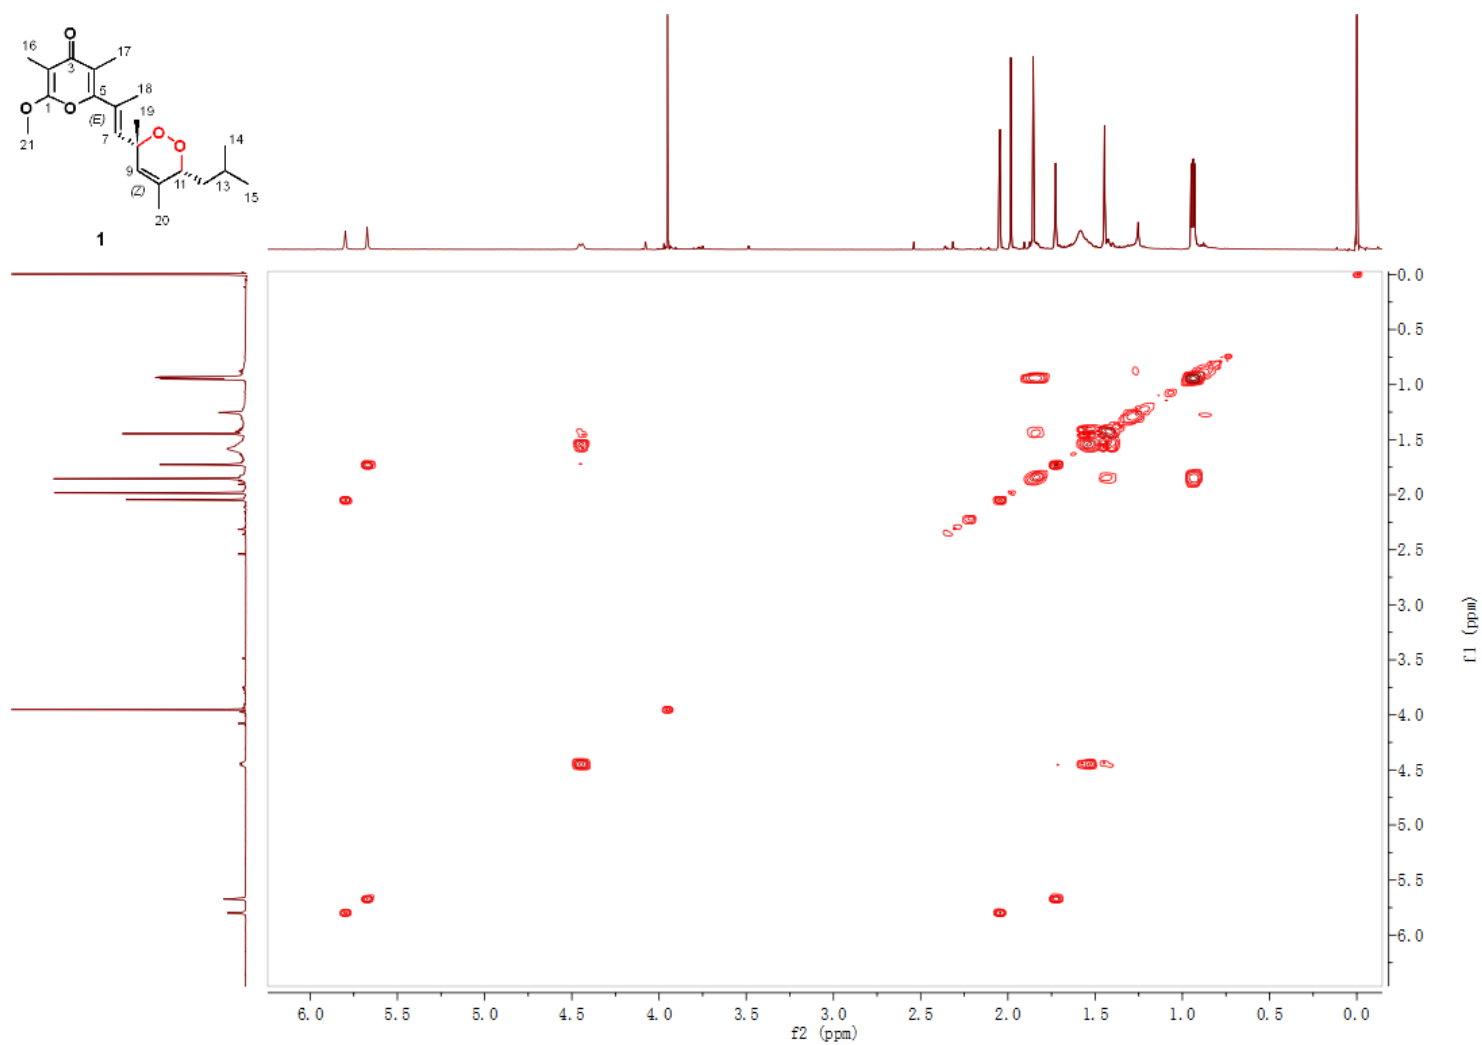

**Figure S24.**  $^1\text{H}$ - $^1\text{H}$  COSY spectrum (600 MHz) of **1** in  $\text{CDCl}_3$ .

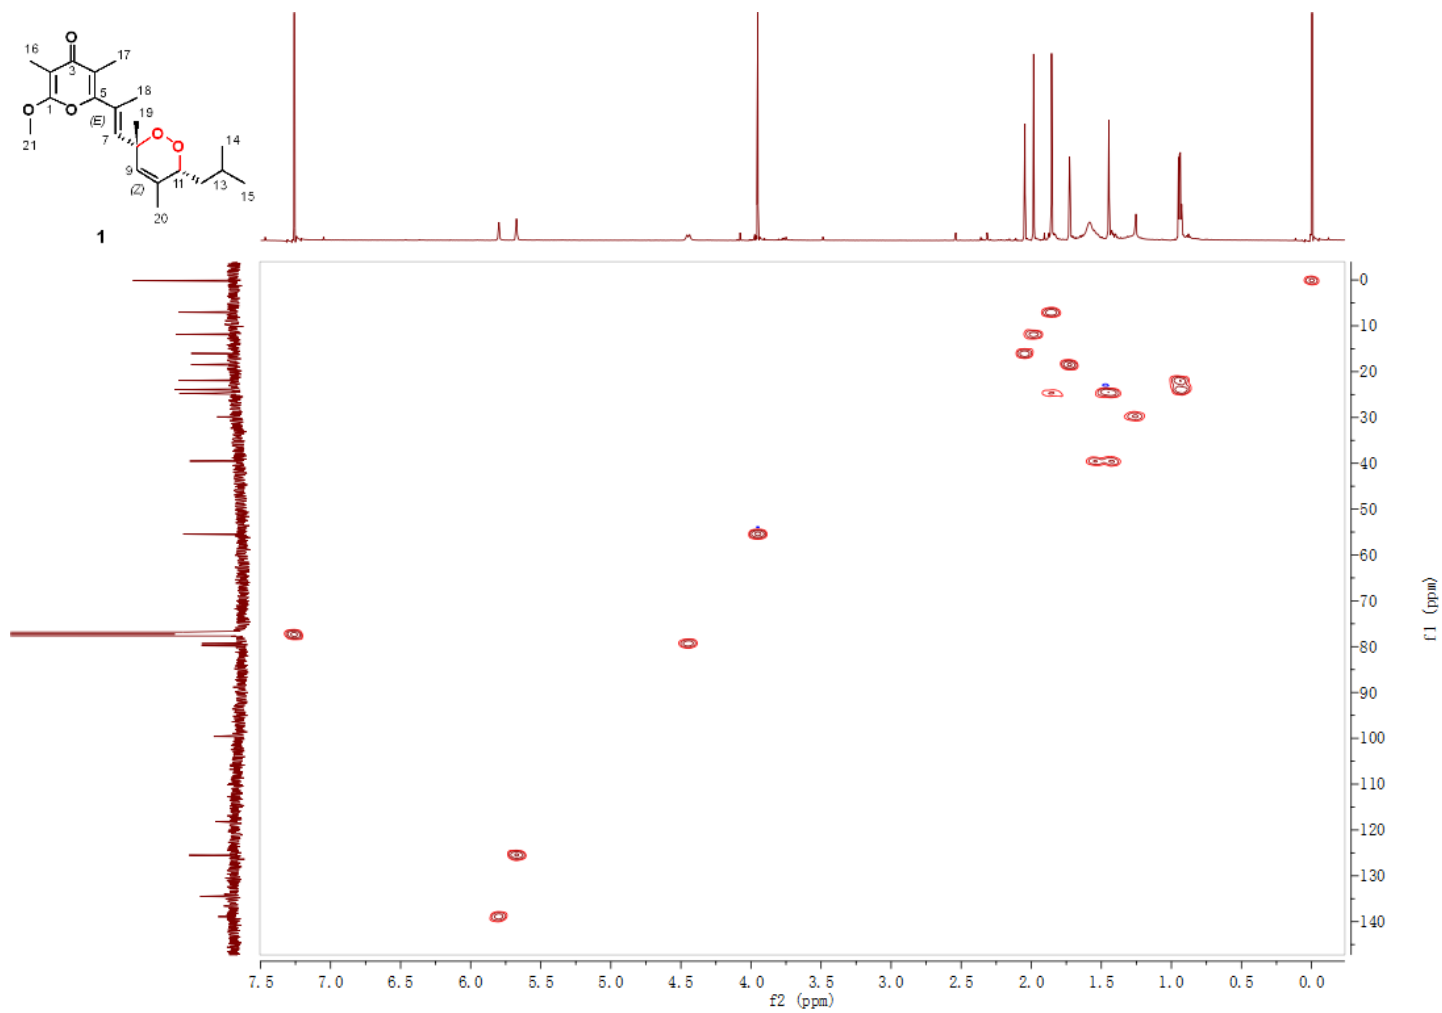

**Figure S25.** HSQC spectrum (600 MHz) of **1** in CDCl<sub>3</sub>.

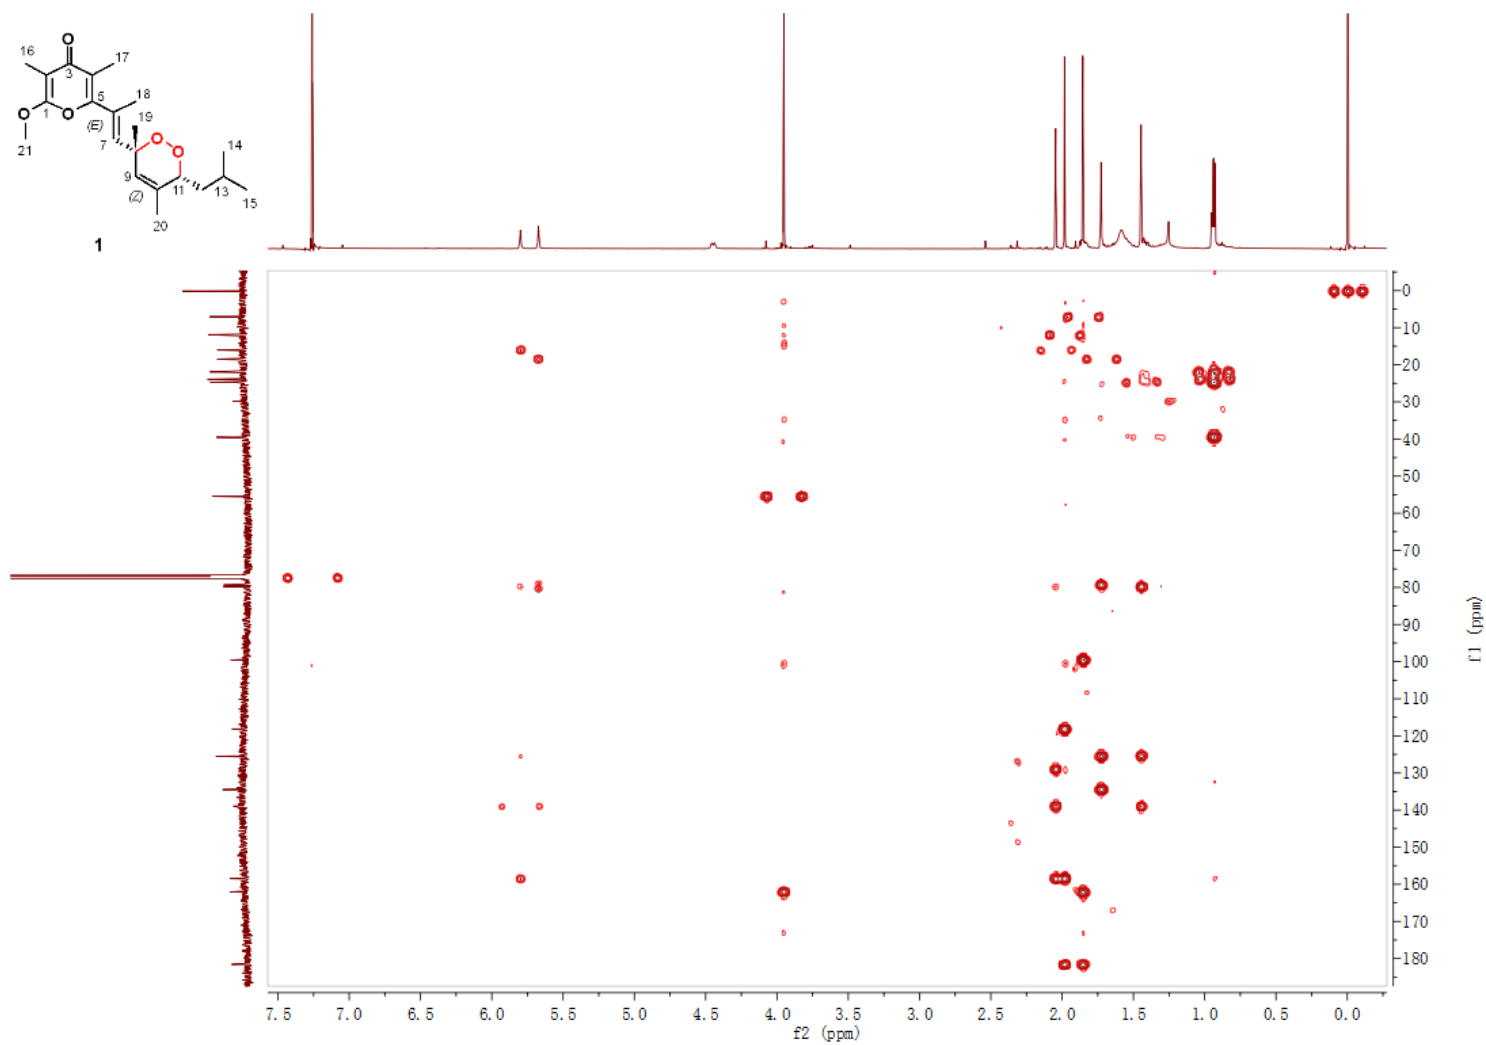

**Figure S26.** HMBC spectrum (600 MHz) of **1** in CDCl<sub>3</sub>.

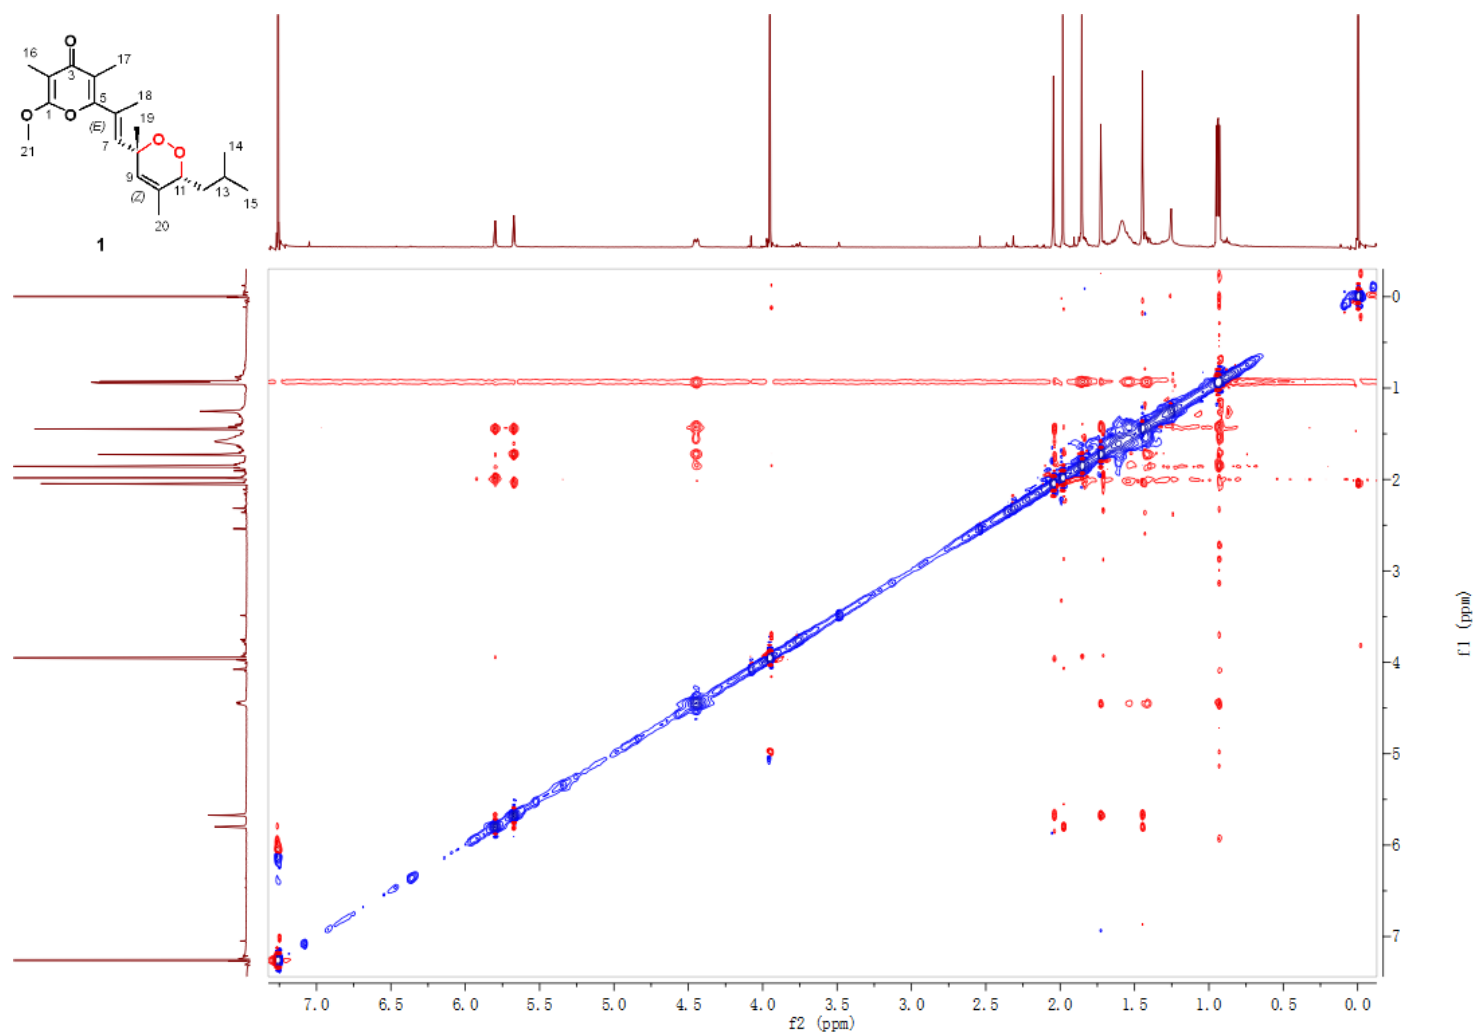

**Figure S27.** NOESY spectrum (600 MHz) of **1** in CDCl<sub>3</sub>.

# User Spectra

**Fragmentor Voltage**

135

**Collision Energy**

0

**Ionization Mode**

ESI

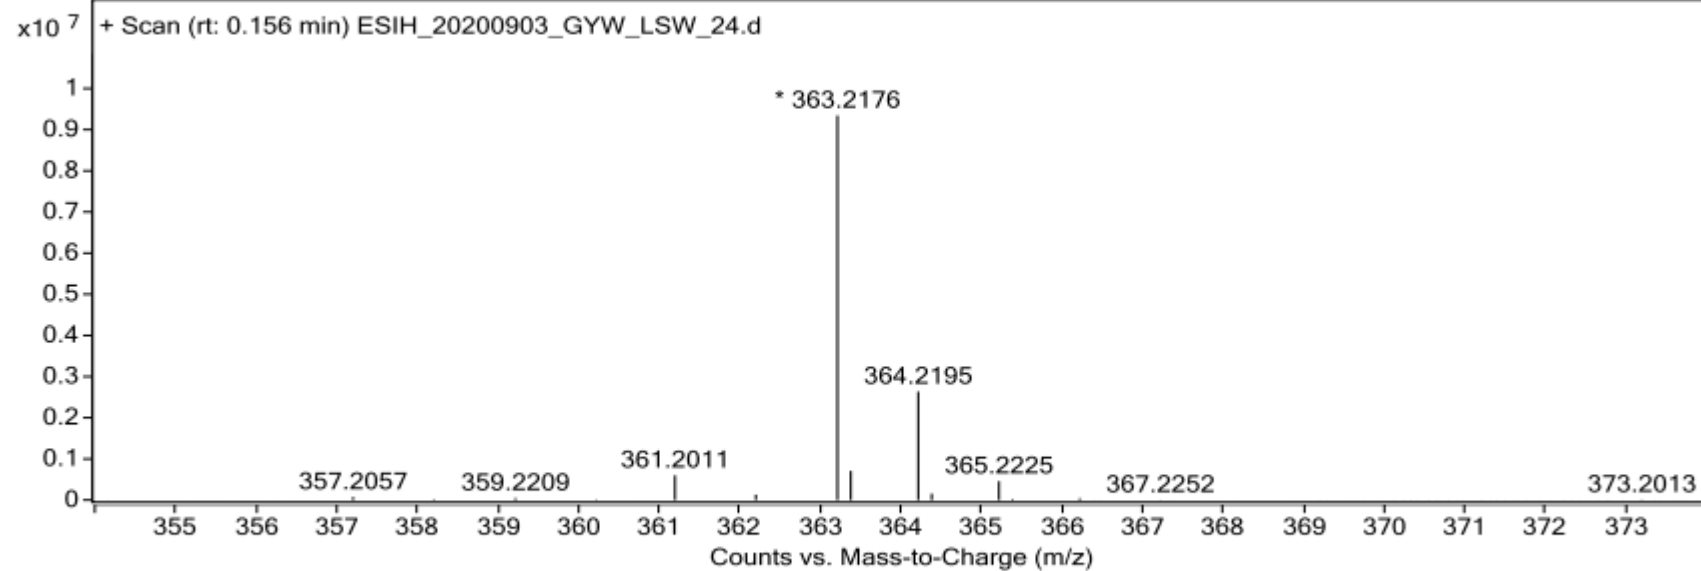

## Formula Calculator Results

| m/z      | Calc m/z | Diff (mDa) | Diff (ppm) | Ion Formula | Ion    |
|----------|----------|------------|------------|-------------|--------|
| 363.2176 | 363.2166 | -0.96      | -2.63      | C21 H31 O5  | (M+H)+ |

**Figure S28.** HR-ESI-MS (positive mode) spectrum of **1**.

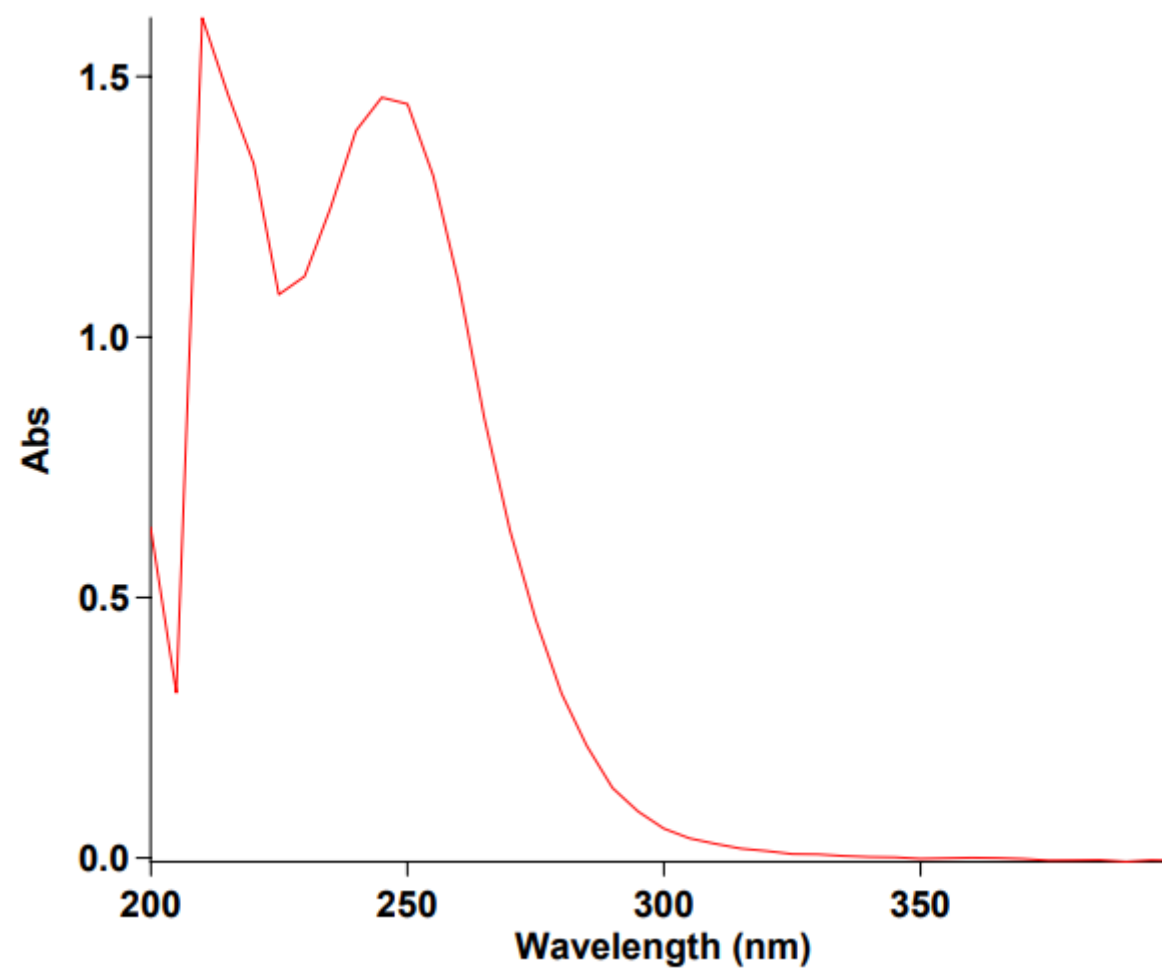

**Figure S29.** UV spectrum of **1**.

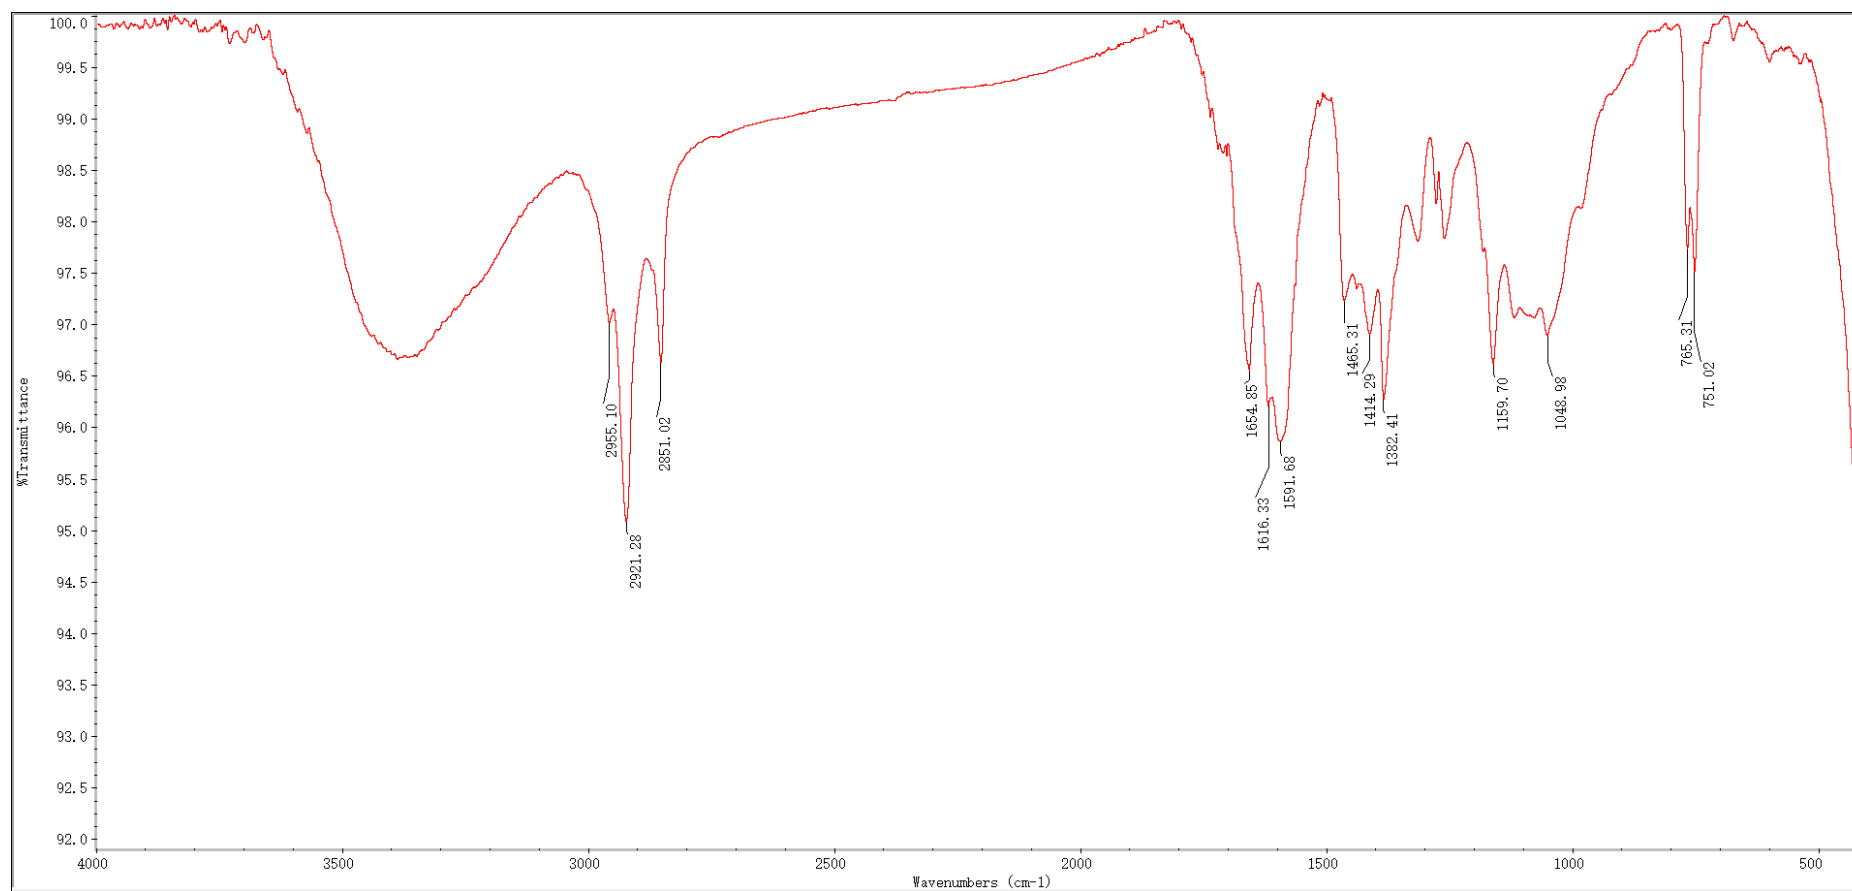

**Figure S30.** IR spectrum of **1**.

**1.6 NMR, HR-ESI-MS, IR, and UV spectra of ocellatuperoxide B (2)**

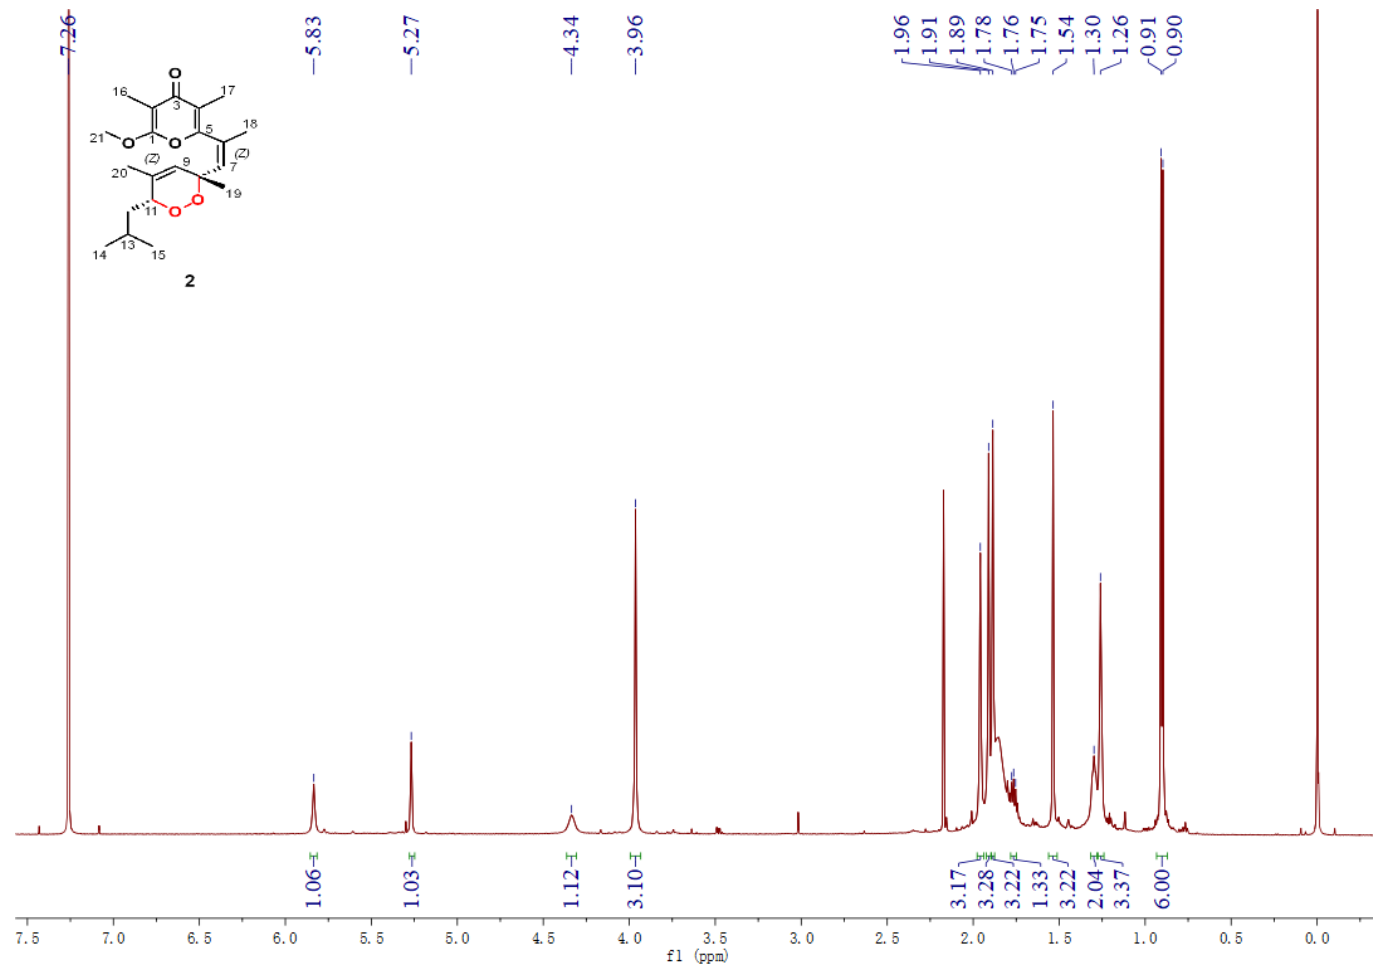

**Figure S31.**  $^1\text{H}$  NMR spectrum (600 MHz) of **2** in  $\text{CDCl}_3$ .



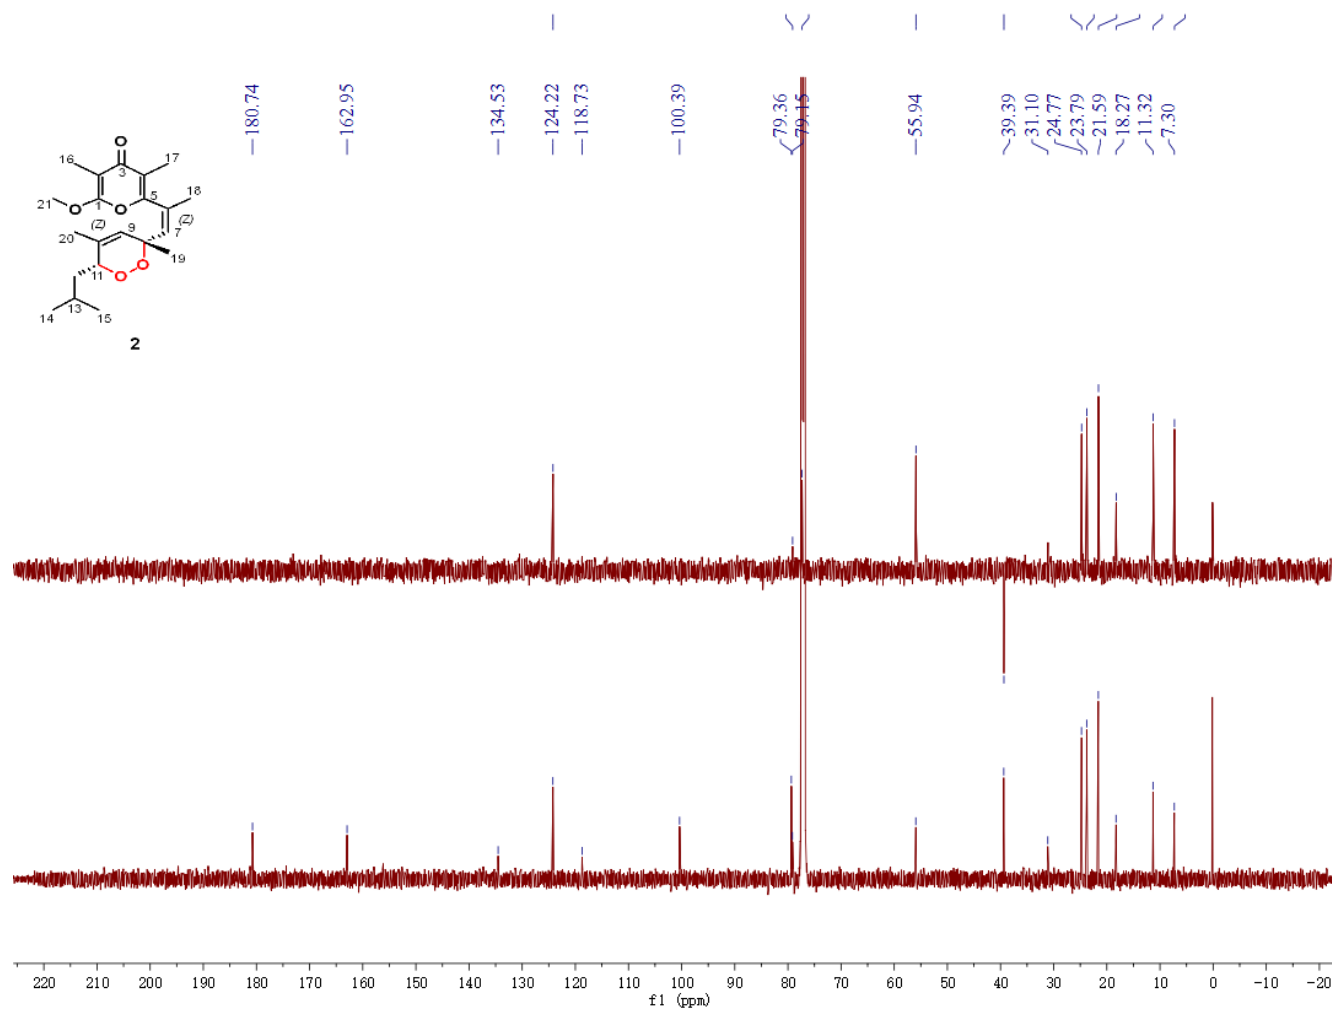

**Figure S32.**  $^{13}\text{C}$  NMR spectrum (150 MHz) of **2** in  $\text{CDCl}_3$ .

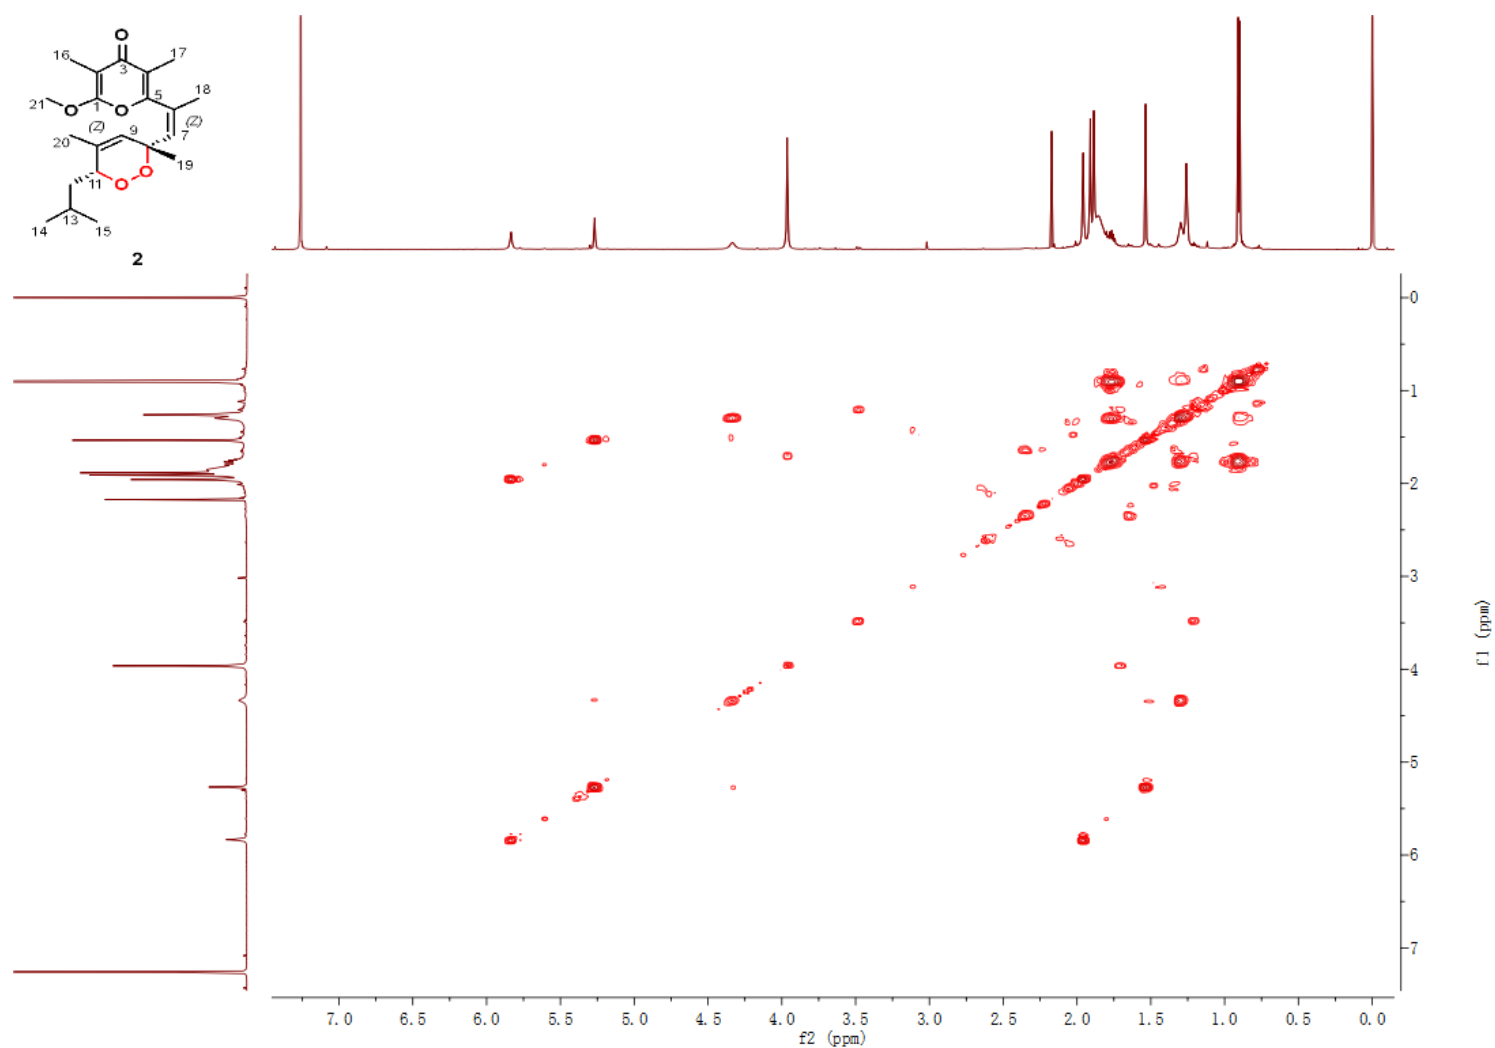

**Figure S33.**  $^1\text{H}$ - $^1\text{H}$  COSY spectrum (600 MHz) of **2** in  $\text{CDCl}_3$ .

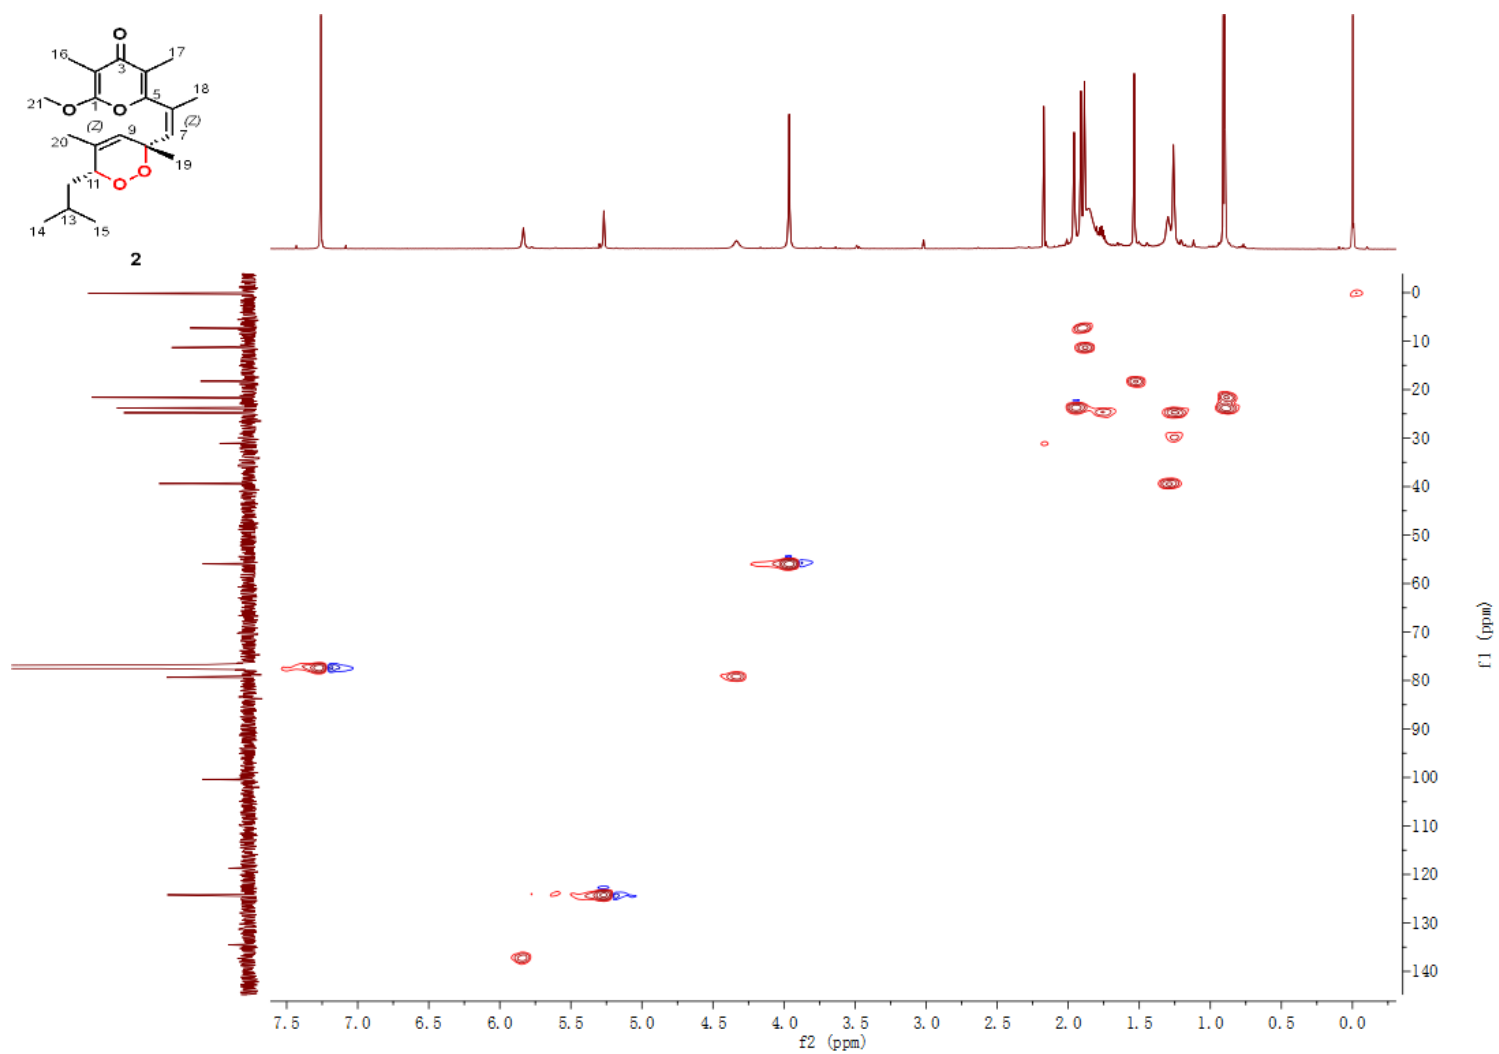

**Figure S34.** HSQC spectrum (600 MHz) of **2** in CDCl<sub>3</sub>.

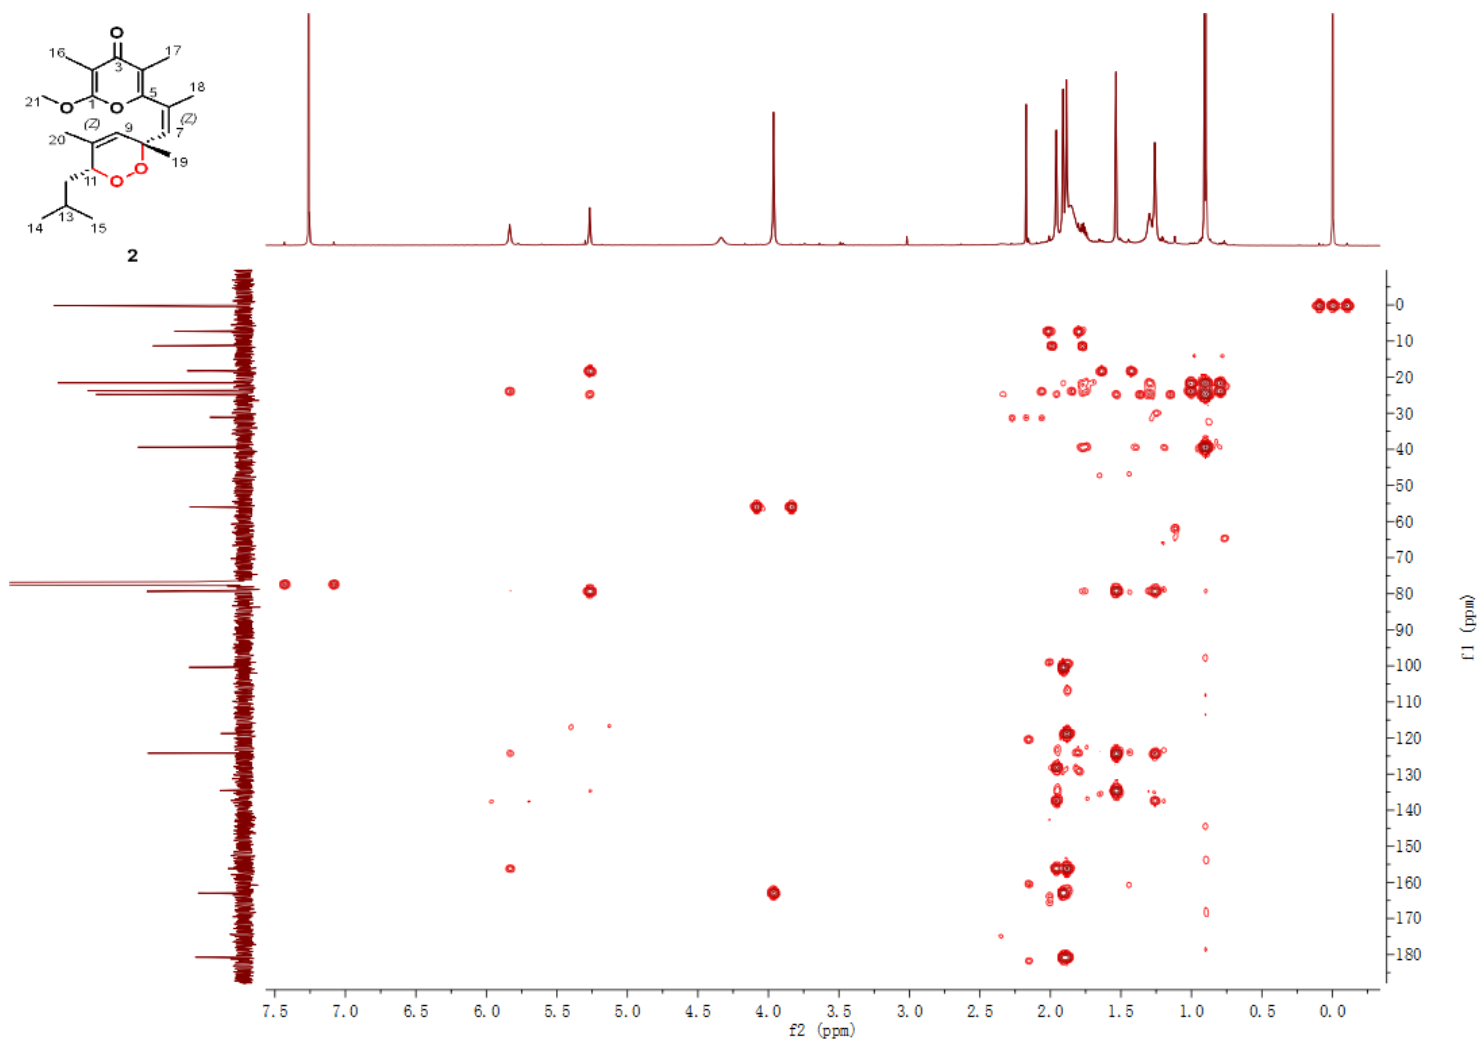

**Figure S35.** HMBC spectrum (600 MHz) of **2** in CDCl<sub>3</sub>.

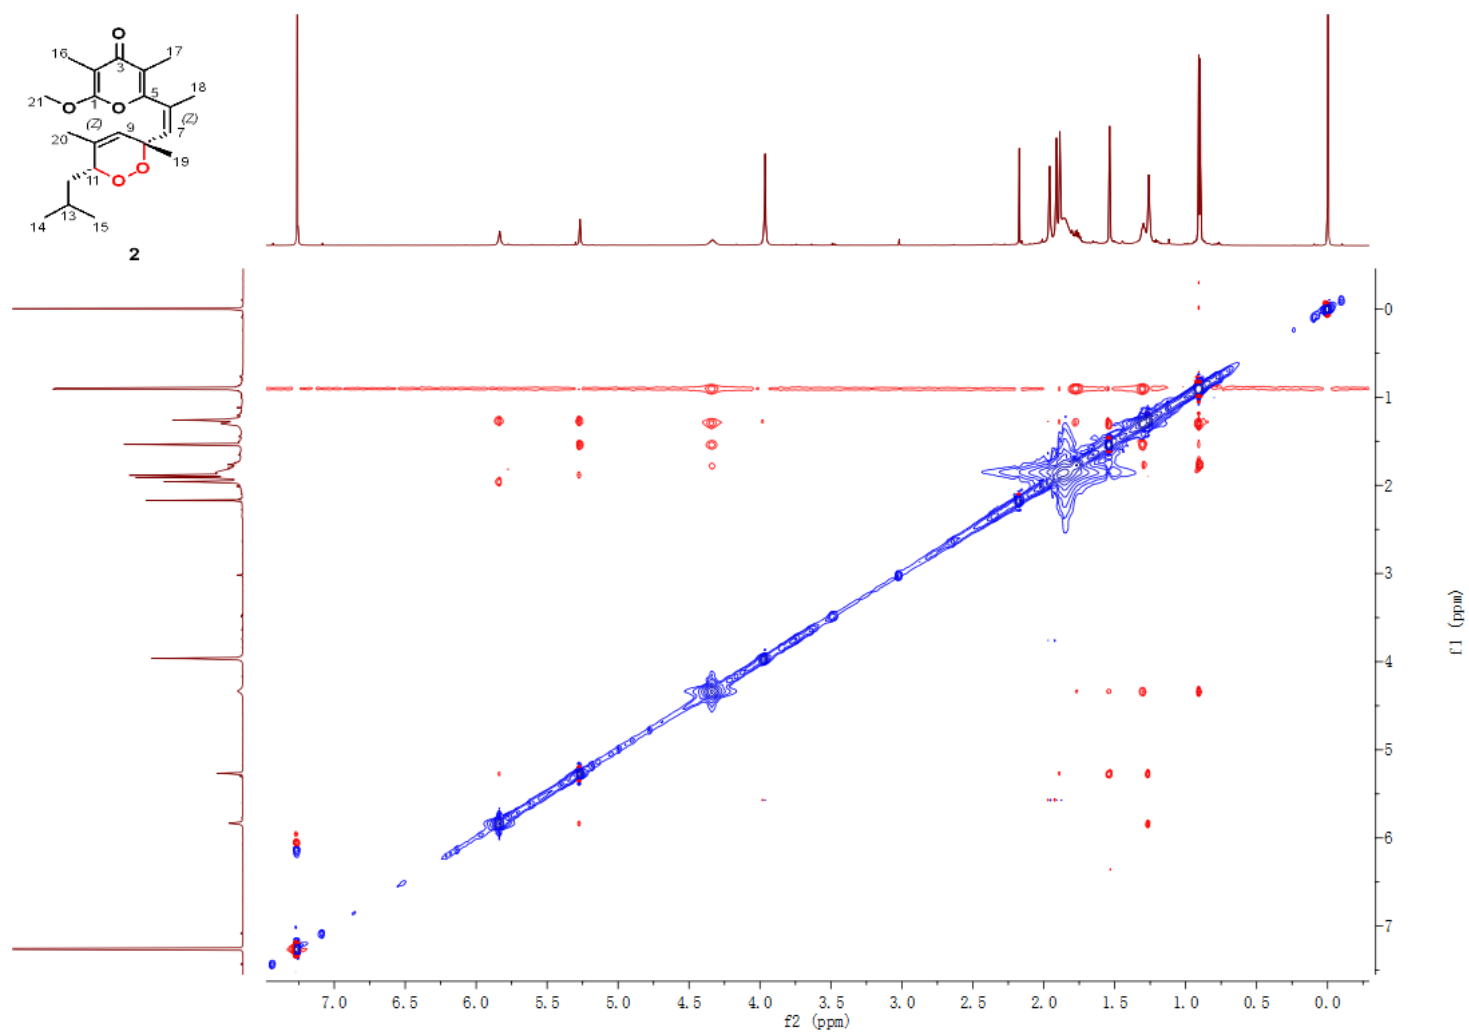

**Figure S36.** NOESY spectrum (600 MHz) of **2** in  $\text{CDCl}_3$ .

# User Spectra

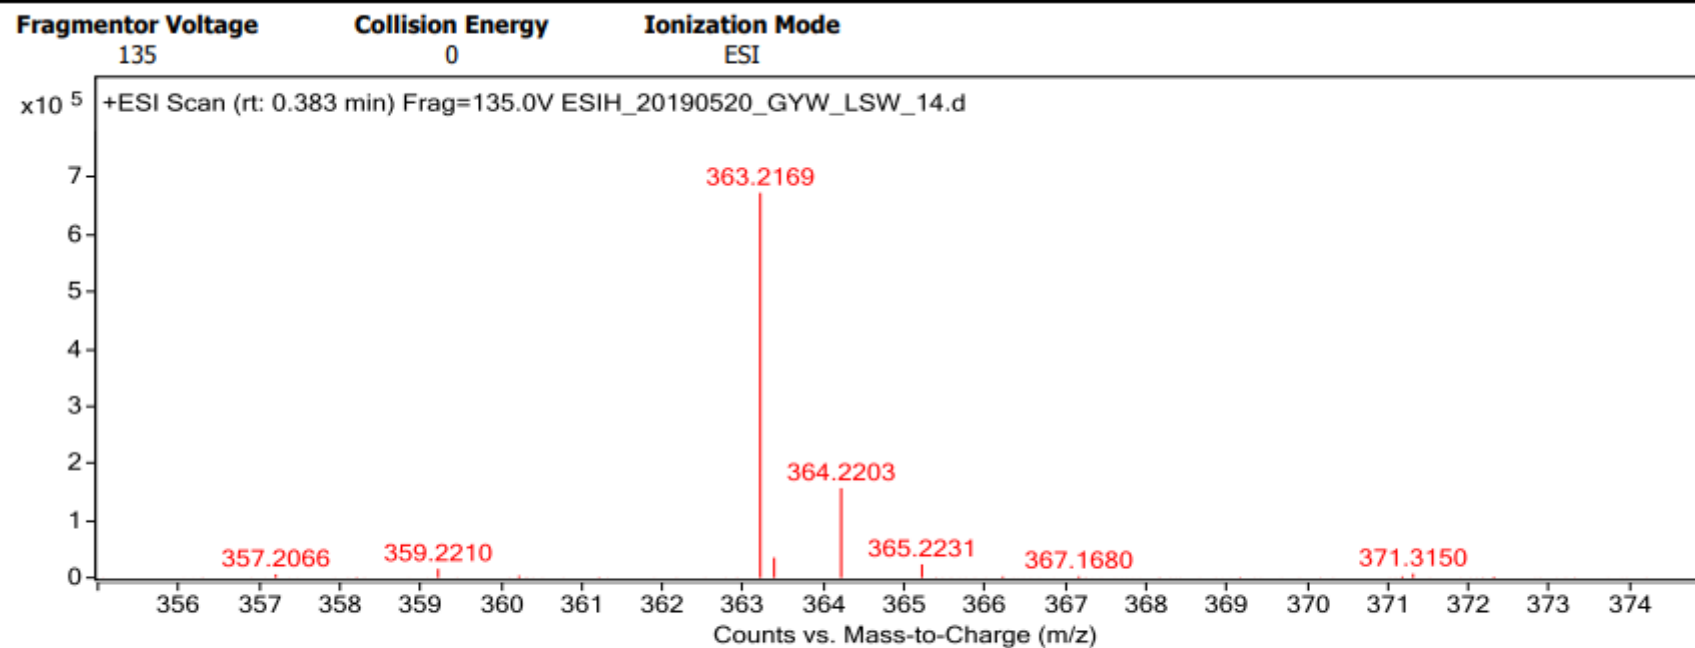

## Formula Calculator Results

| m/z      | Calc m/z | Diff (mDa) | Diff (ppm) | Ion Formula | Ion    |
|----------|----------|------------|------------|-------------|--------|
| 363.2169 | 363.2166 | -0.27      | -0.75      | C21 H31 O5  | (M+H)+ |

**Figure S37.** HR-ESI-MS (positive mode) spectrum of **2**.

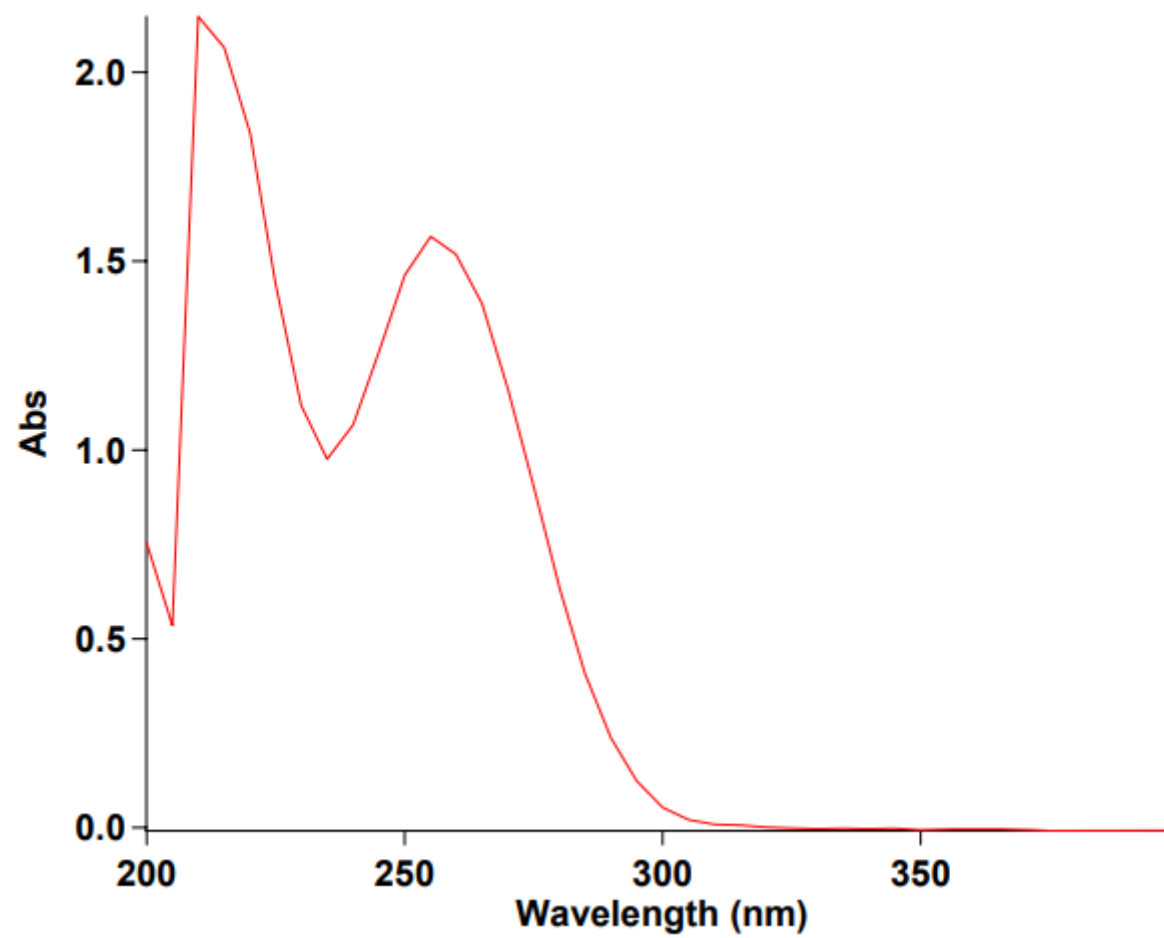

**Figure S38.** UV spectrum of **2**.

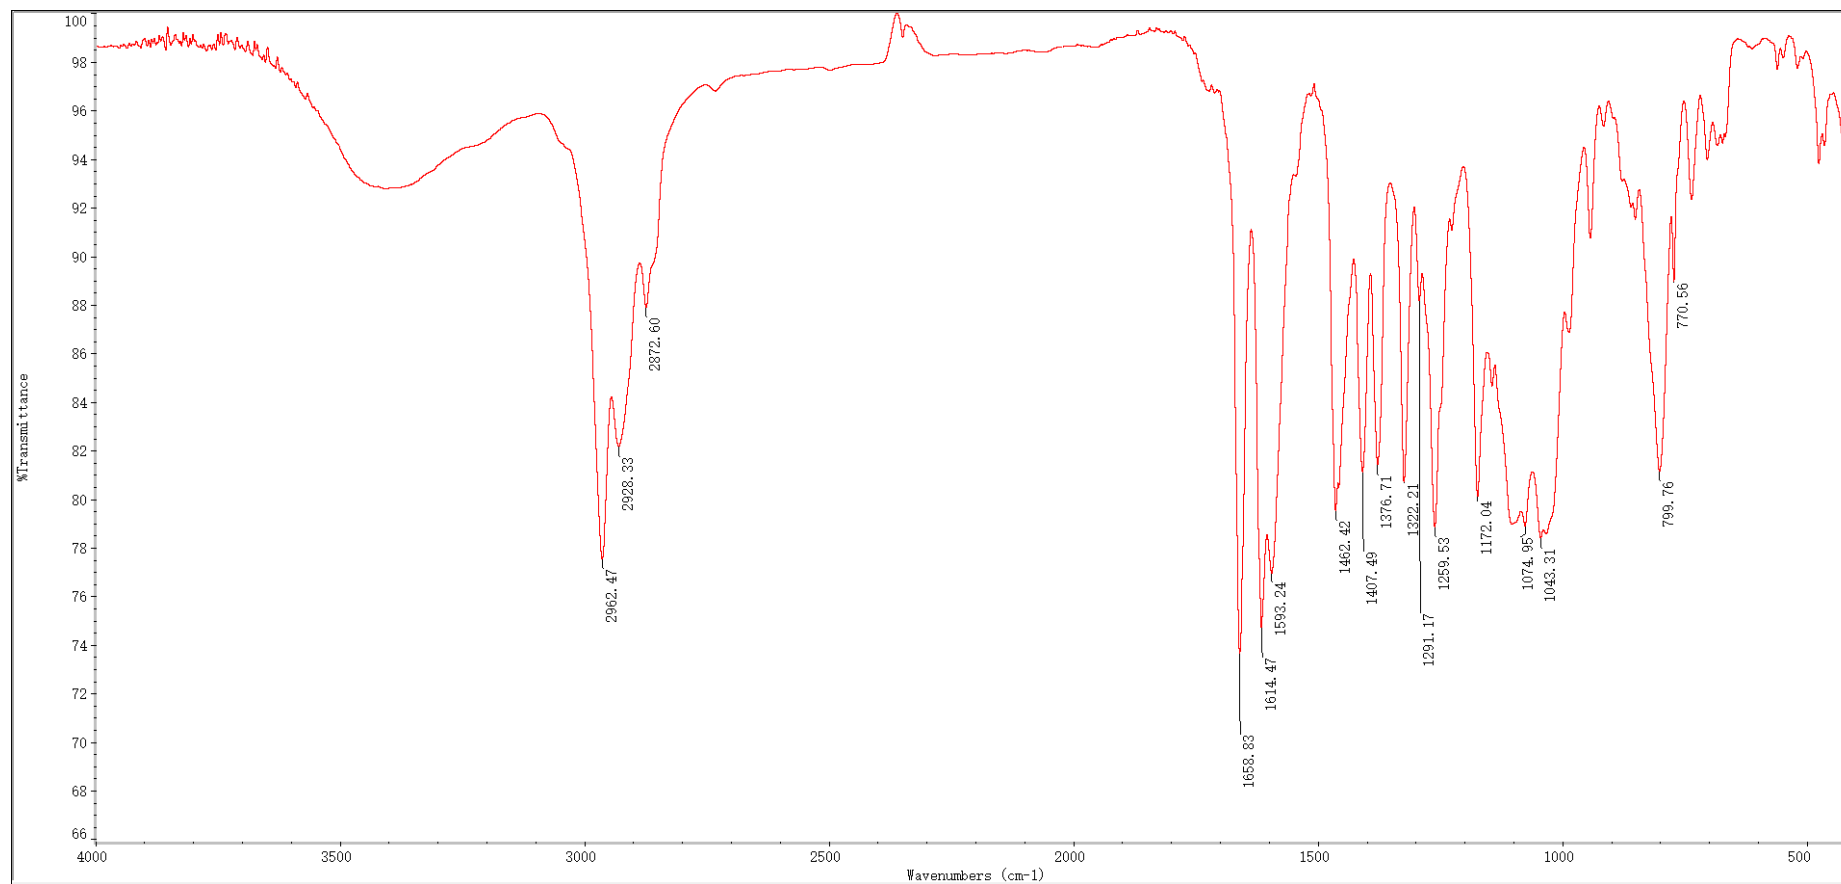

**Figure S39.** IR spectrum of **2**.



**1.7 NMR, HR-ESI-MS, IR, and UV spectra of ocellatuperoxide C (3)**

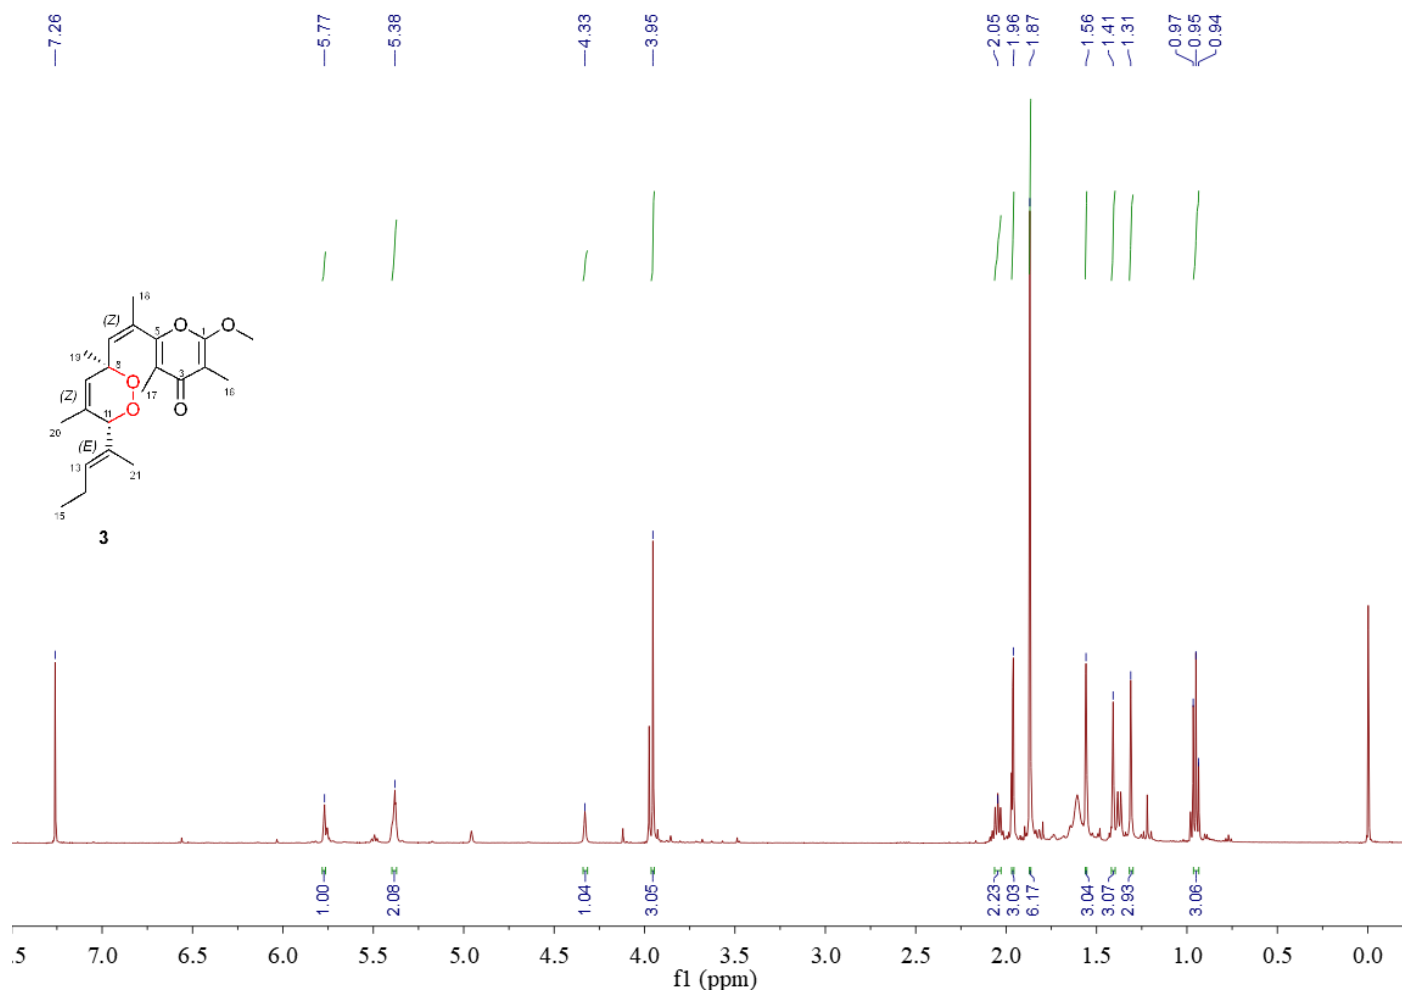

**Figure S40.**  $^1\text{H}$  NMR spectrum (600 MHz) of **3** in  $\text{CDCl}_3$ .

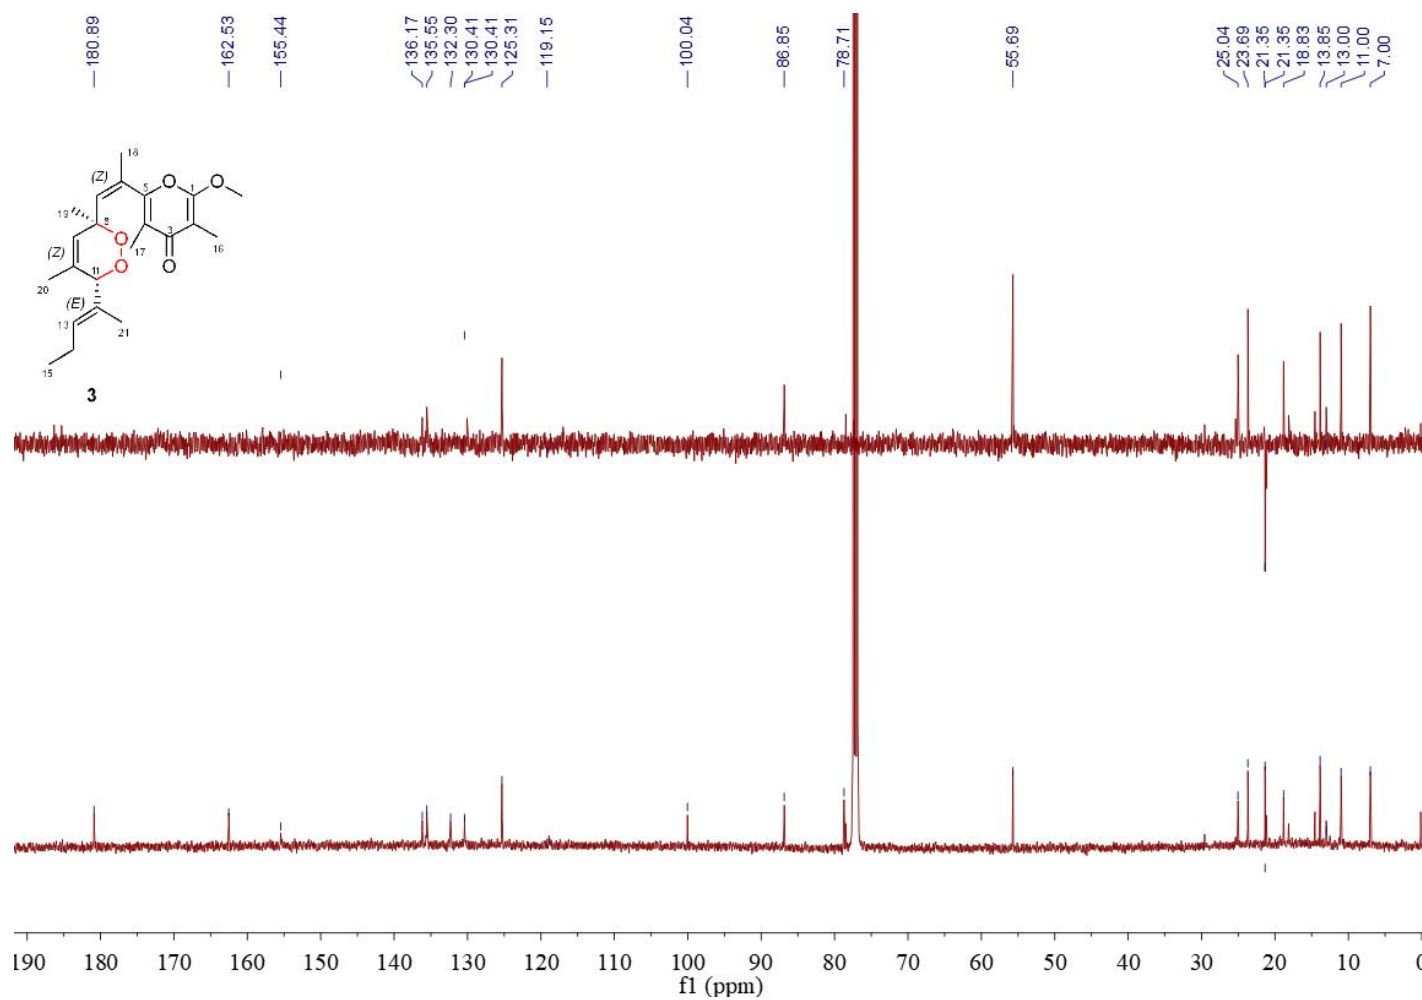

**Figure S41.** <sup>13</sup>C NMR spectrum (150 MHz) of **3** in CDCl<sub>3</sub>.

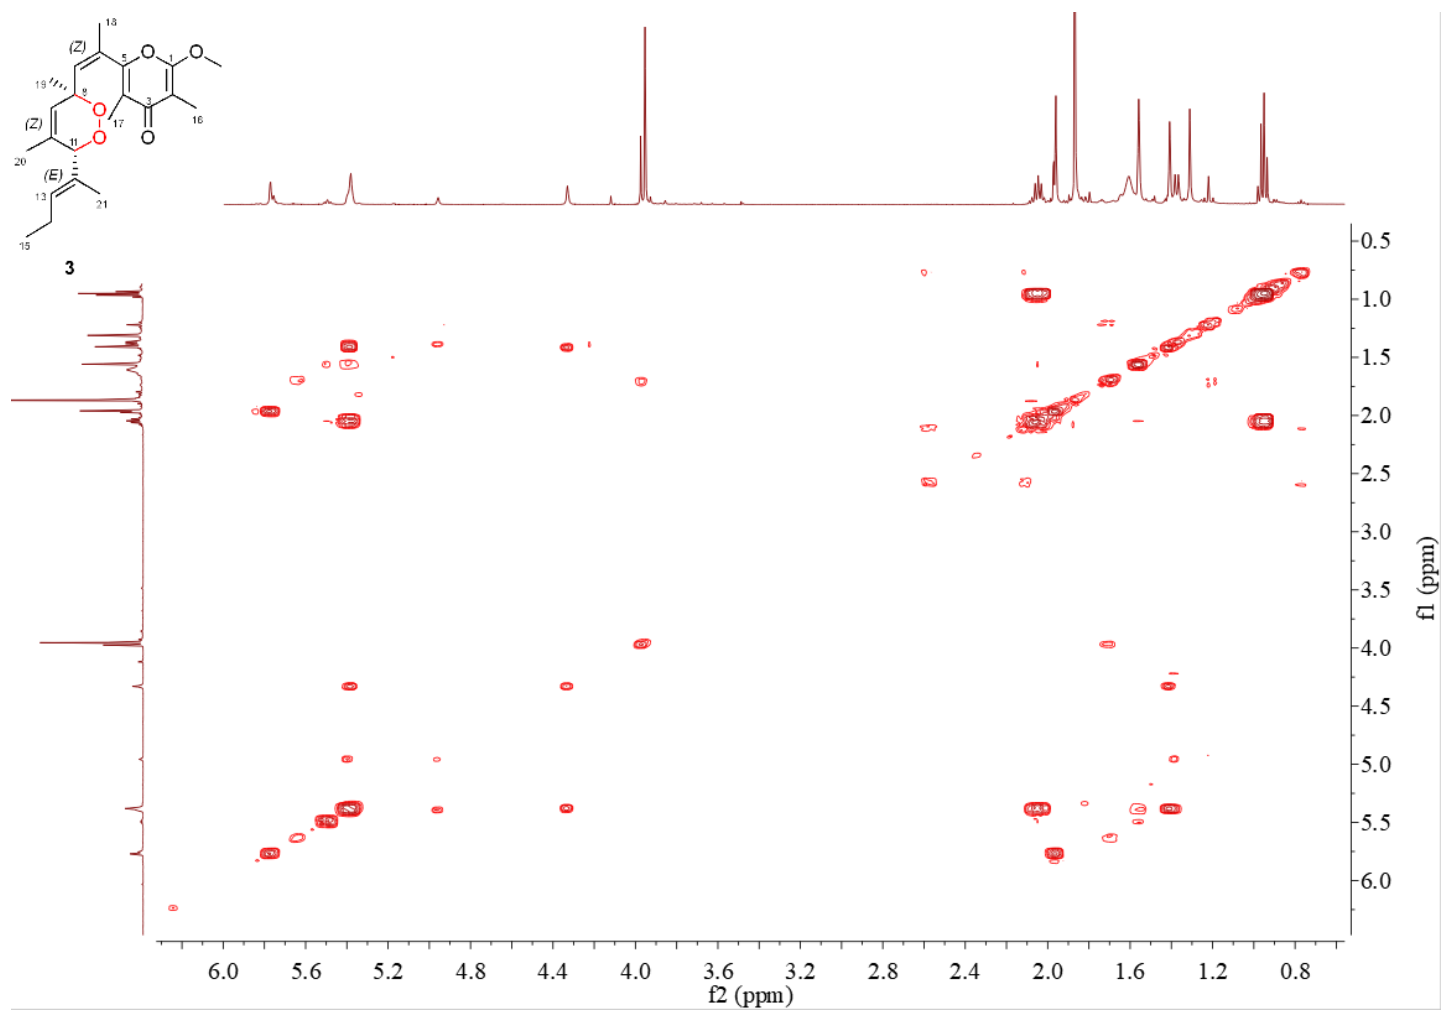

**Figure S42.**  $^1\text{H}$ - $^1\text{H}$  COSY spectrum (600 MHz) of **3** in  $\text{CDCl}_3$ .

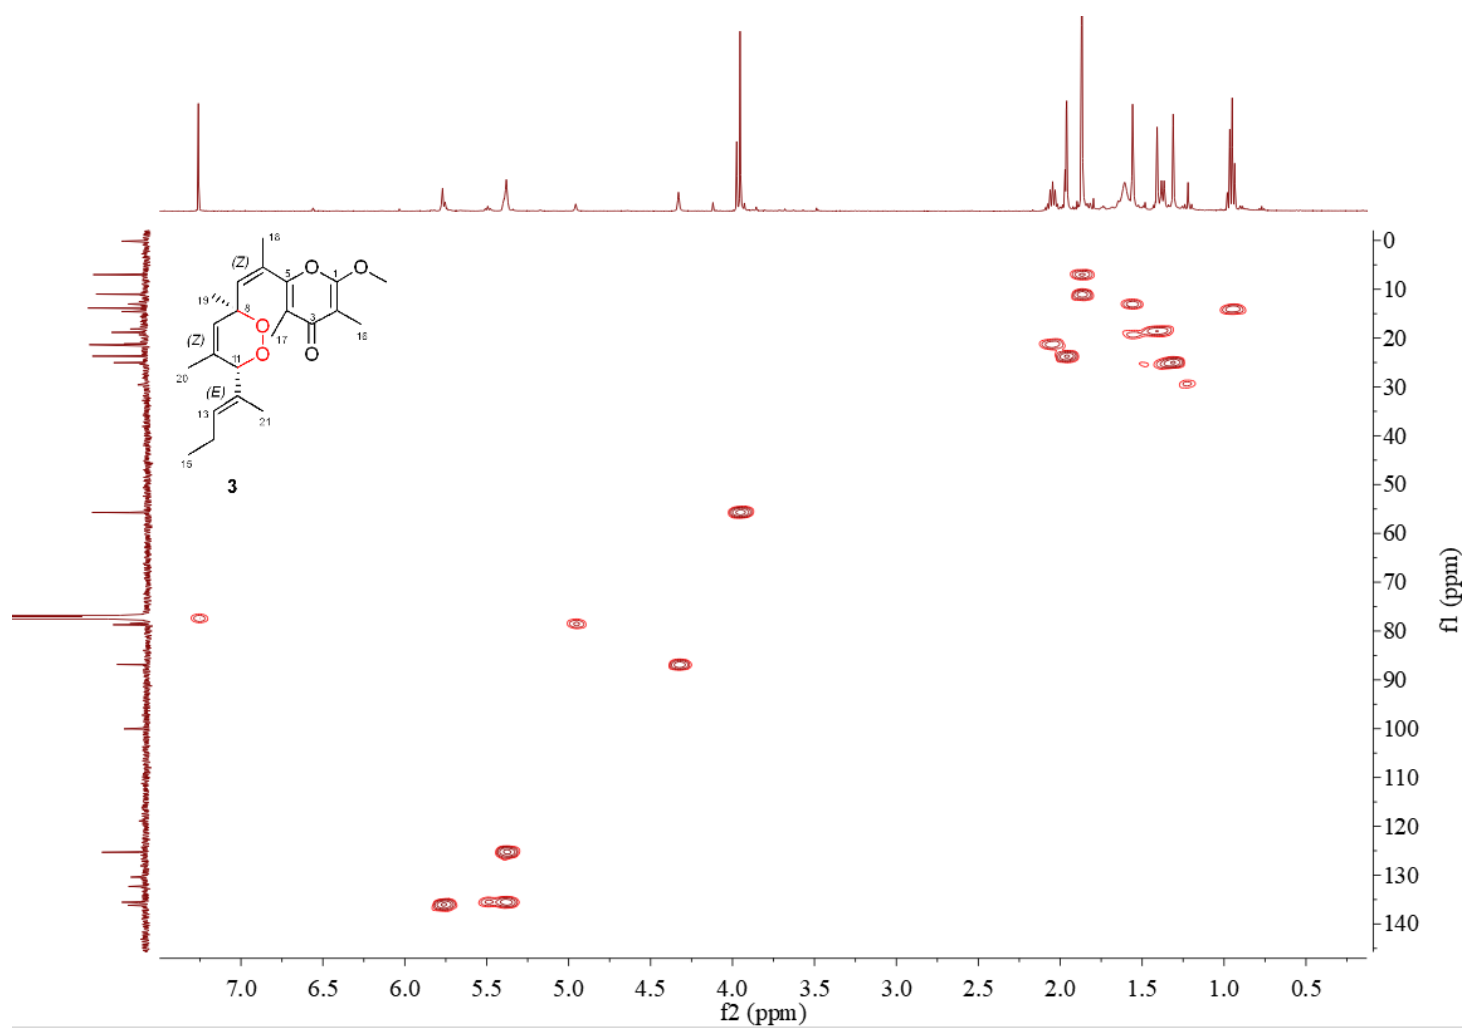

**Figure S43.** HSQC spectrum (600 MHz) of **3** in CDCl<sub>3</sub>.

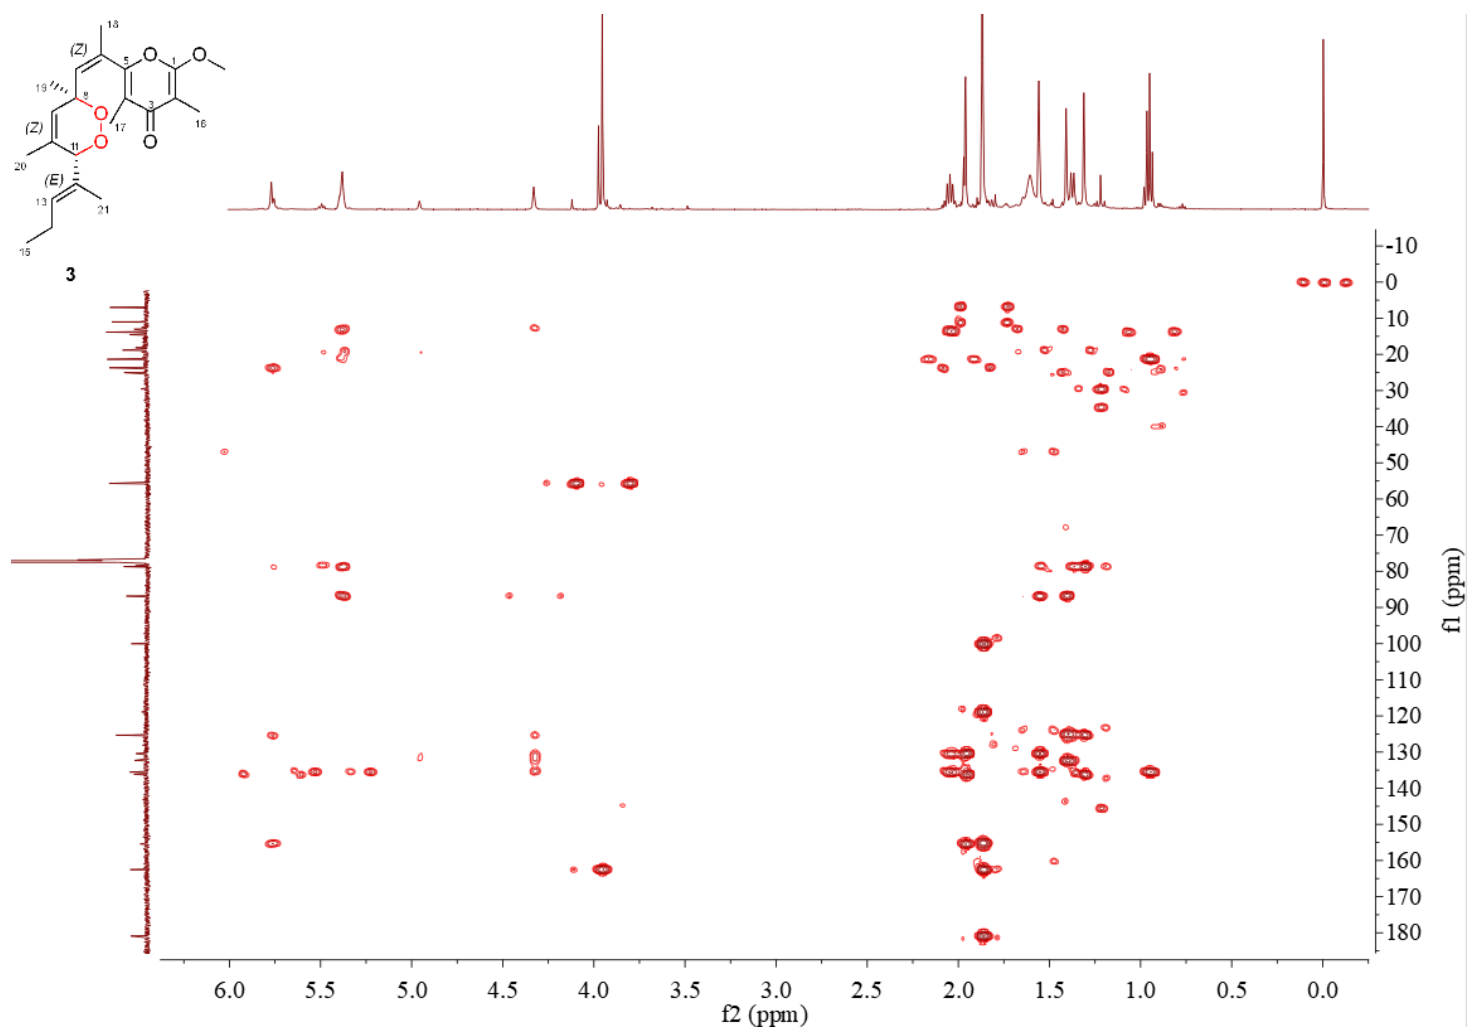

**Figure S44.** HMBC spectrum (600 MHz) of **3** in CDCl<sub>3</sub>.

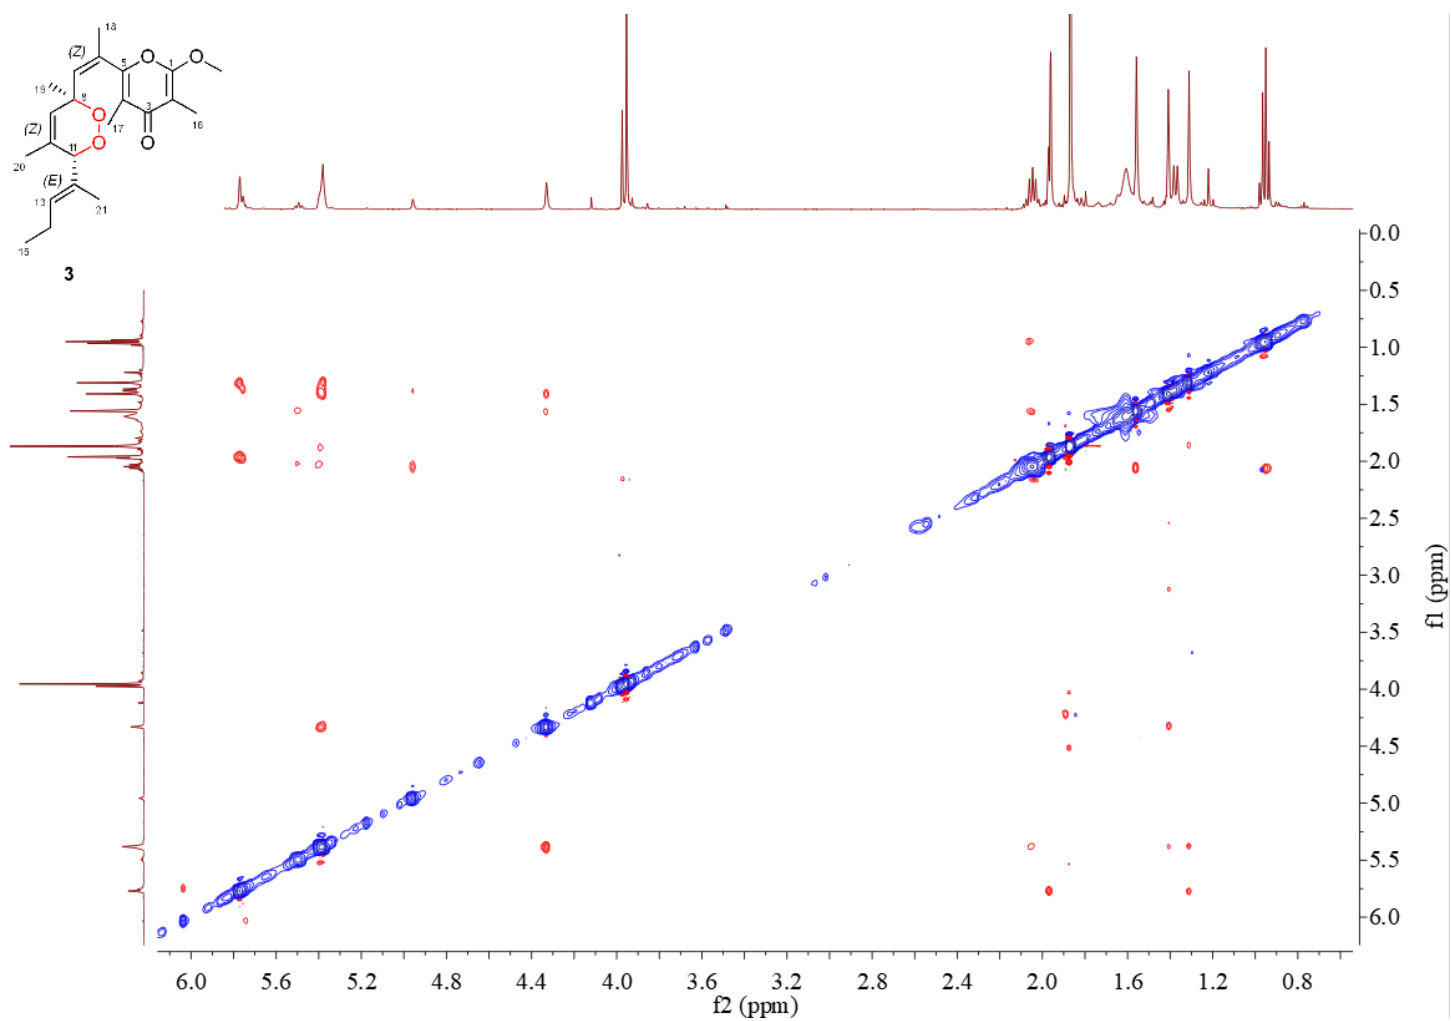

**Figure S45.** NOESY spectrum (600 MHz) of **3** in CDCl<sub>3</sub>.

# User Spectra

Fragmentor Voltage

175

Collision Energy

0

Ionization Mode

ESI

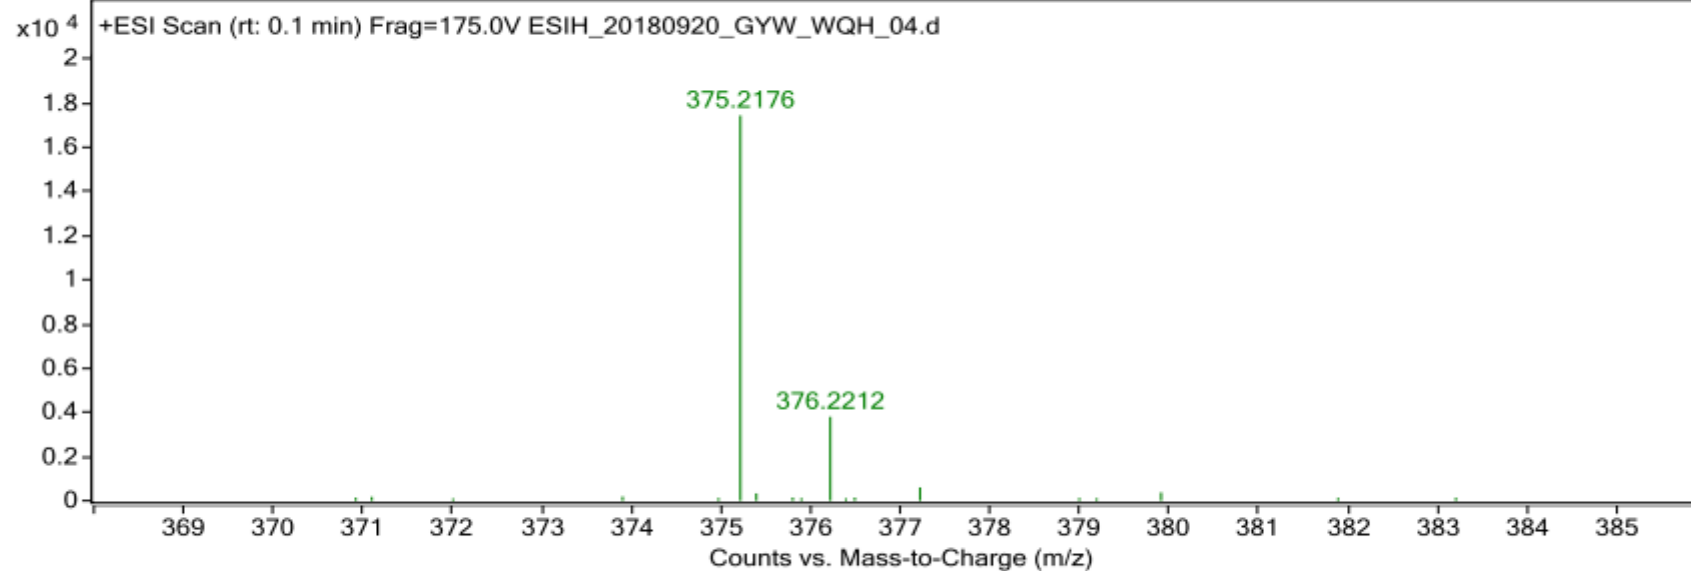

## Formula Calculator Results

| m/z      | Calc m/z | Diff (mDa) | Diff (ppm) | Ion Formula | Ion    |
|----------|----------|------------|------------|-------------|--------|
| 375.2176 | 375.2166 | -1.02      | -2.71      | C22 H31 O5  | (M+H)+ |

Figure S46. HR-ESI-MS (positive mode) spectrum of **3**.

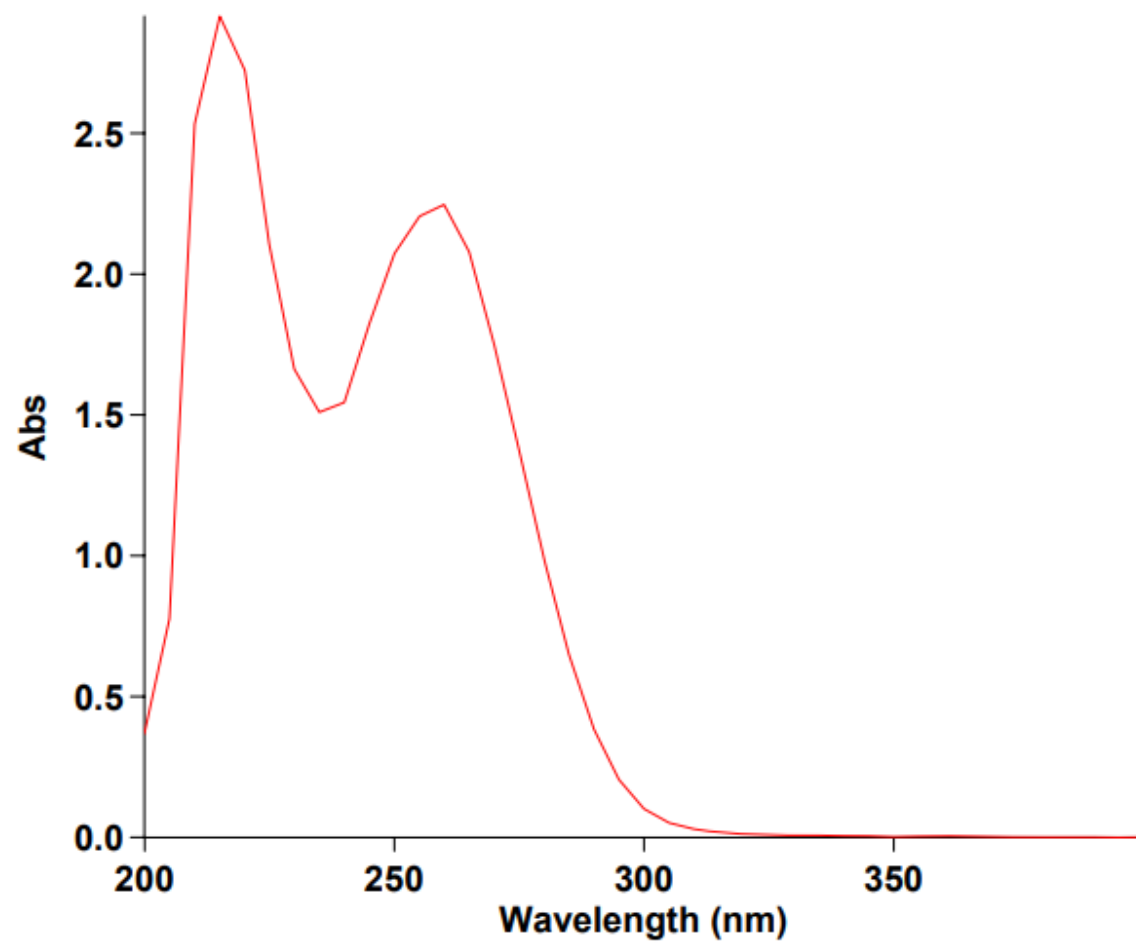

**Figure S47.** UV spectrum of **3**.



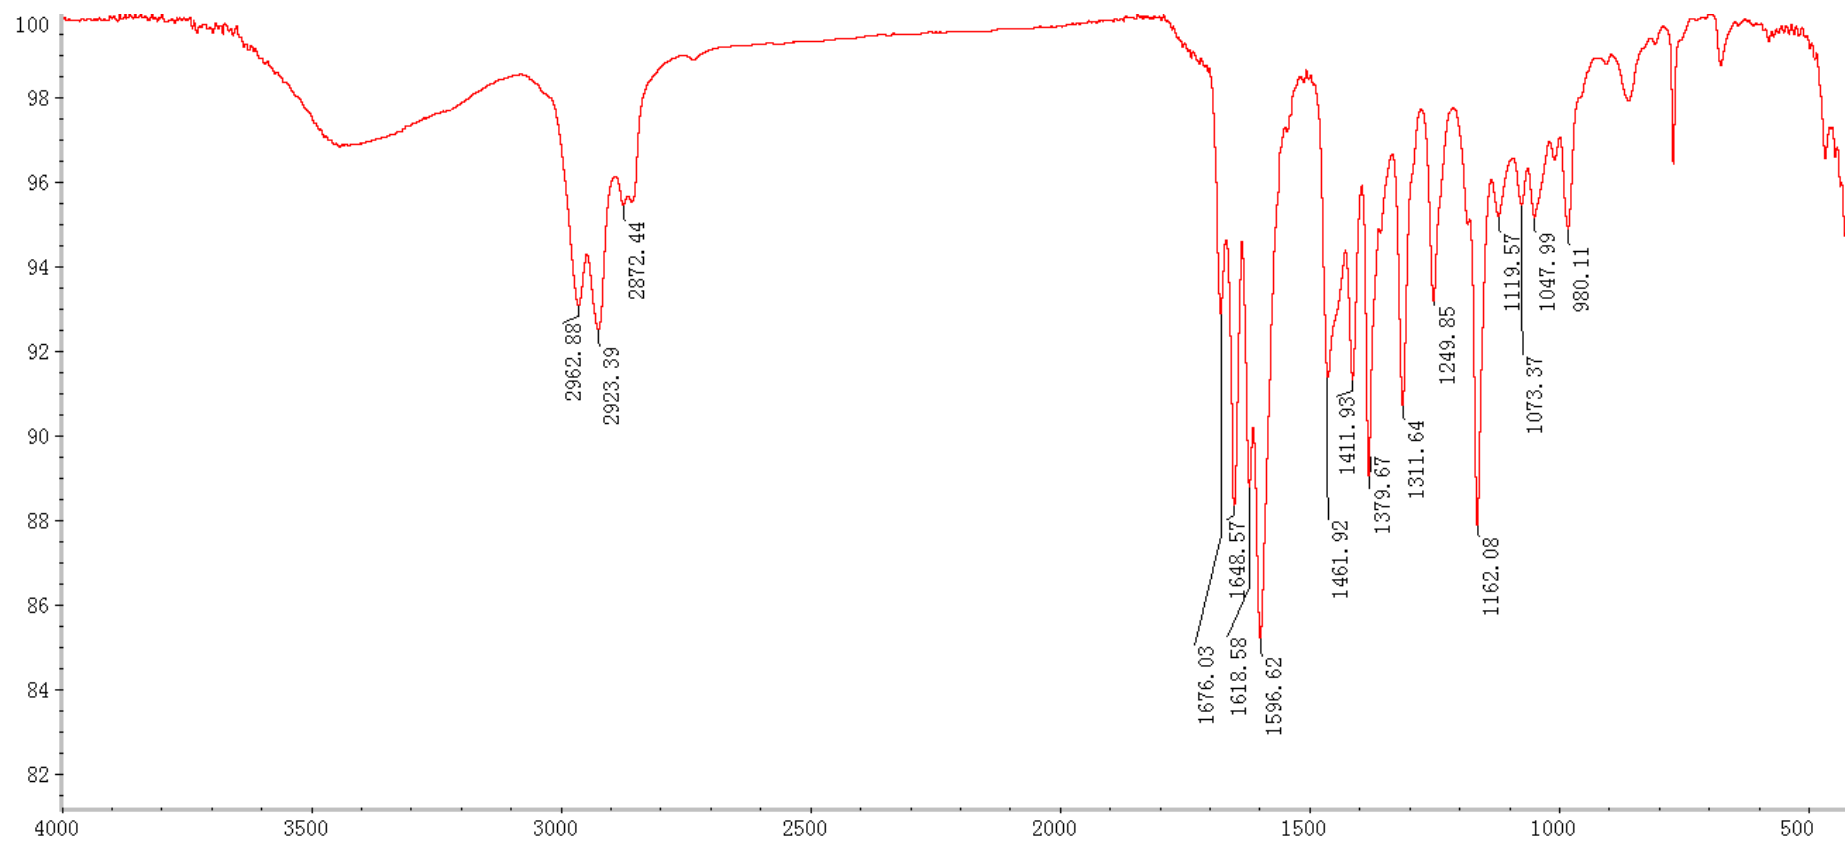

**Figure S48.** IR spectrum of **3**.

1.8 NMR, HR-ESI-MS, IR, and UV spectra of ocellatuperoxide D (**4**)

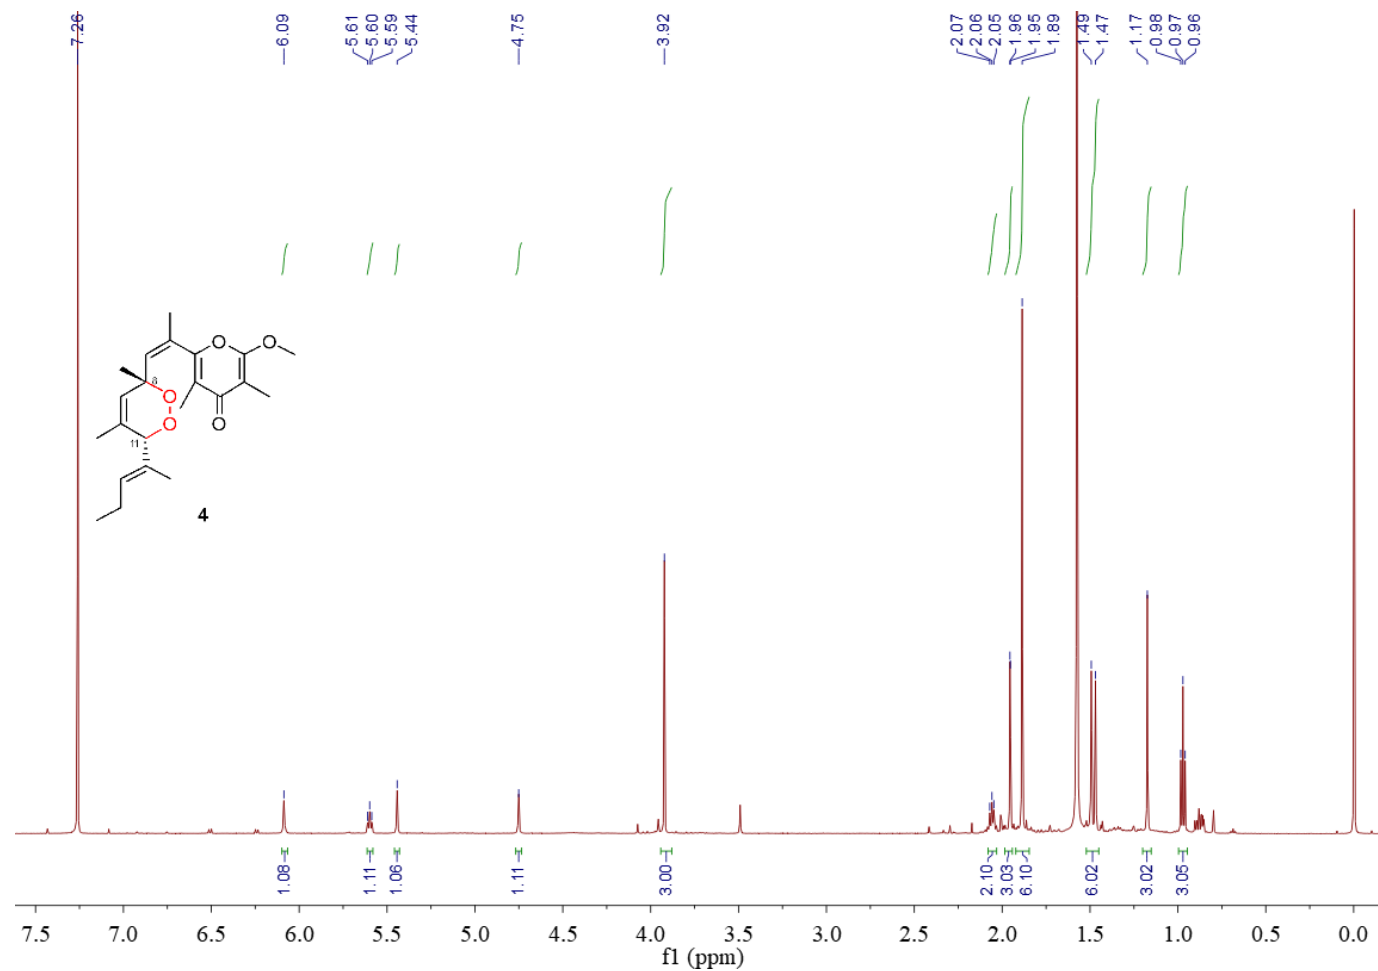

Figure S49. <sup>1</sup>H NMR spectrum (600 MHz) of **4** in CDCl<sub>3</sub>.

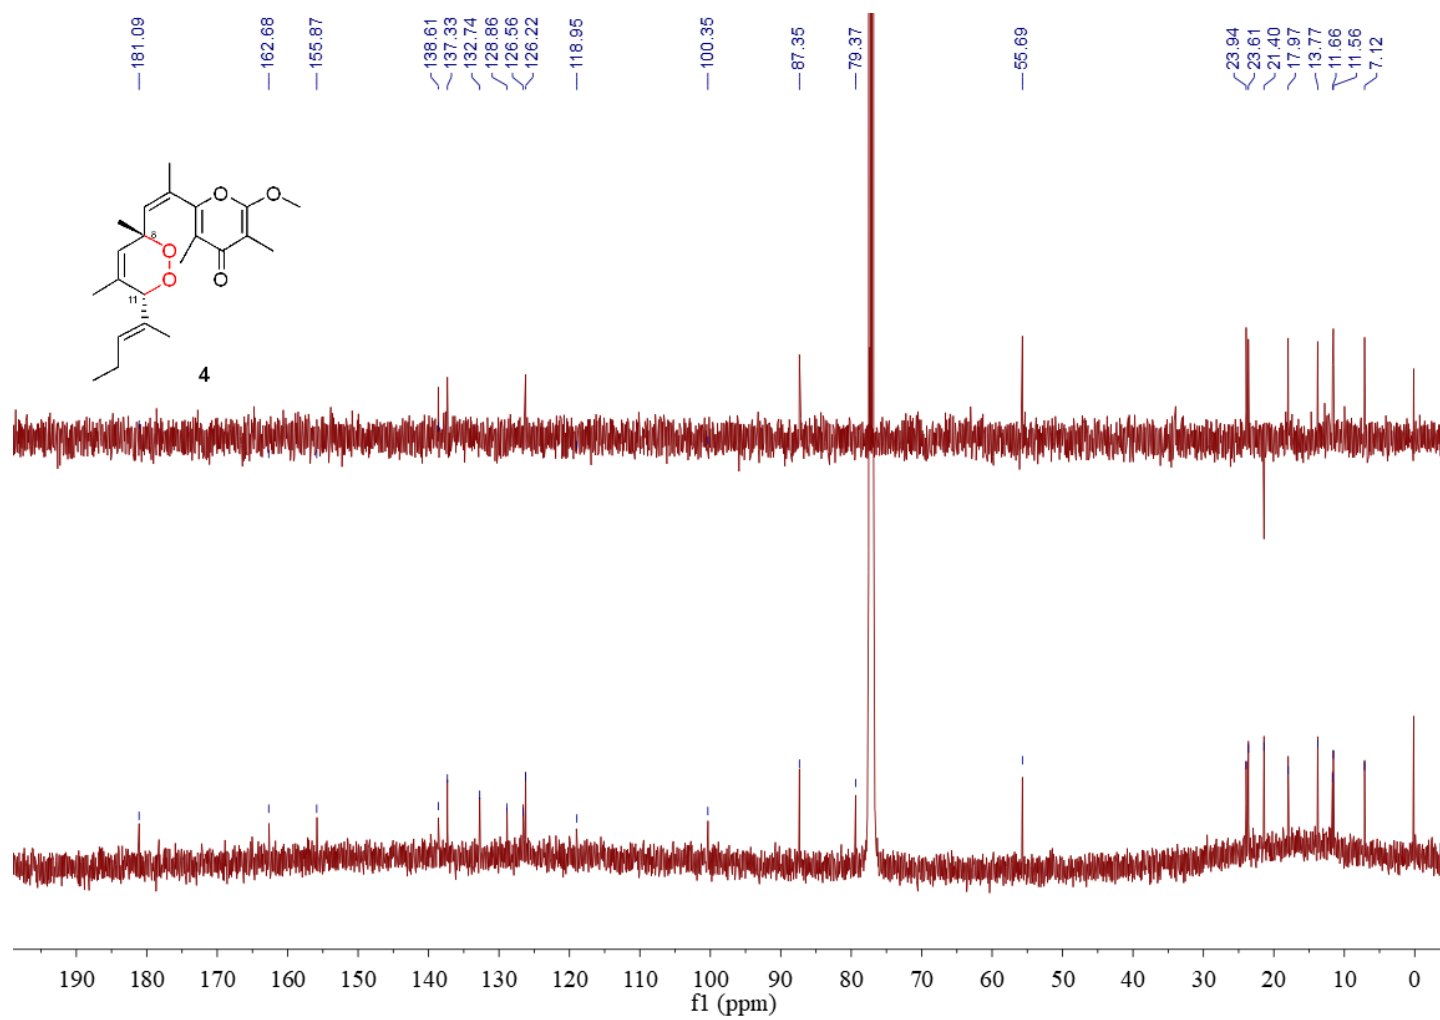

**Figure S50.**  $^{13}\text{C}$  NMR spectrum (150 MHz) of **4** in  $\text{CDCl}_3$ .

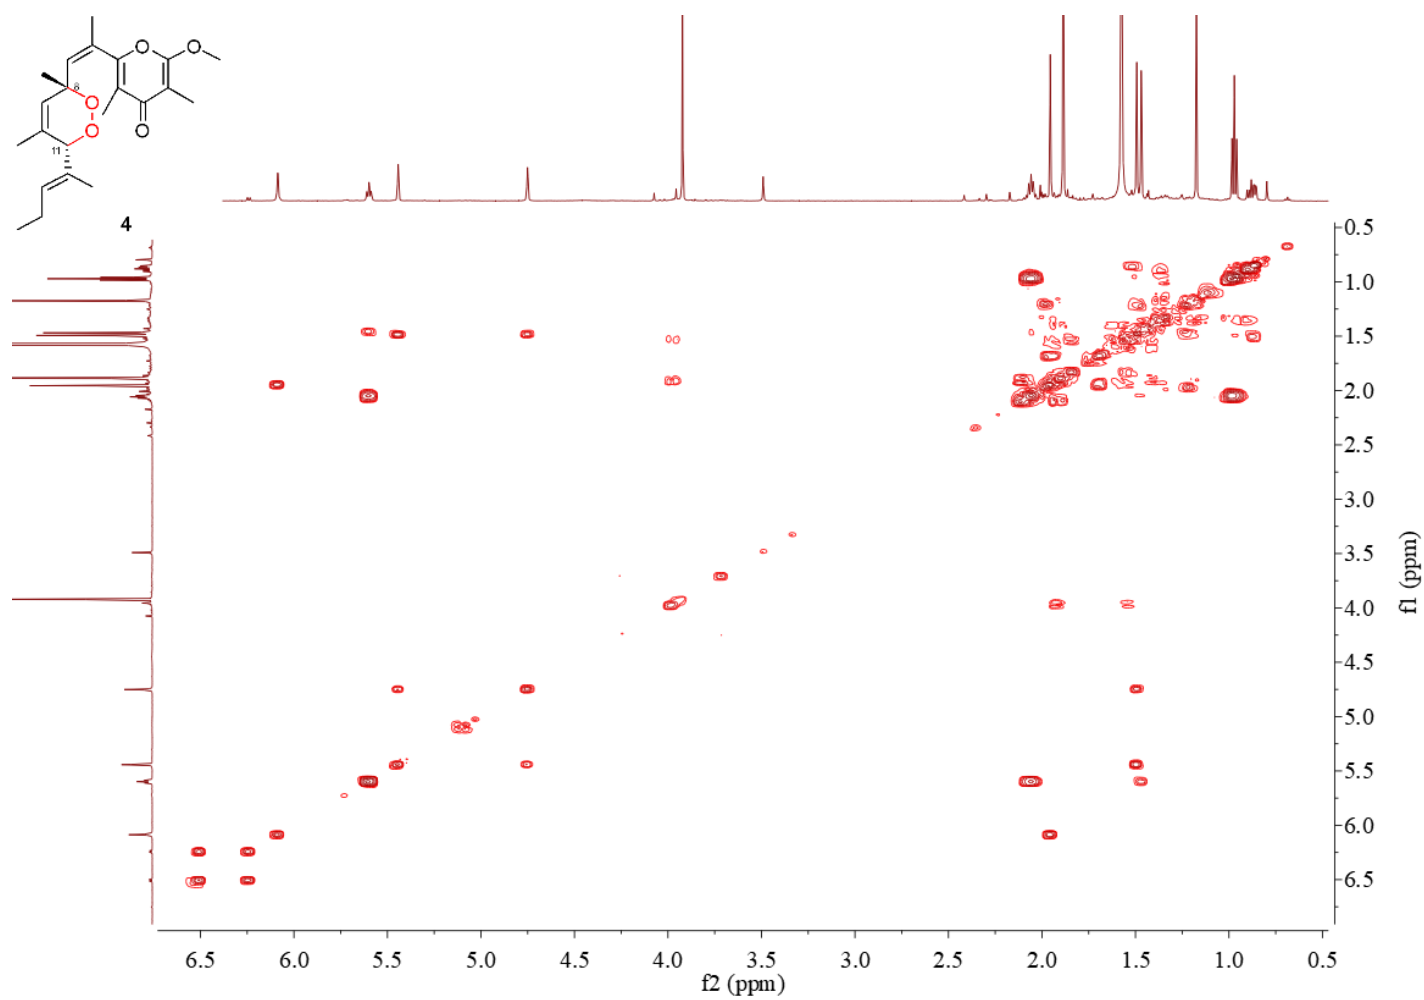

**Figure S51.**  $^1\text{H}$ - $^1\text{H}$  COSY spectrum (600 MHz) of **4** in  $\text{CDCl}_3$ .

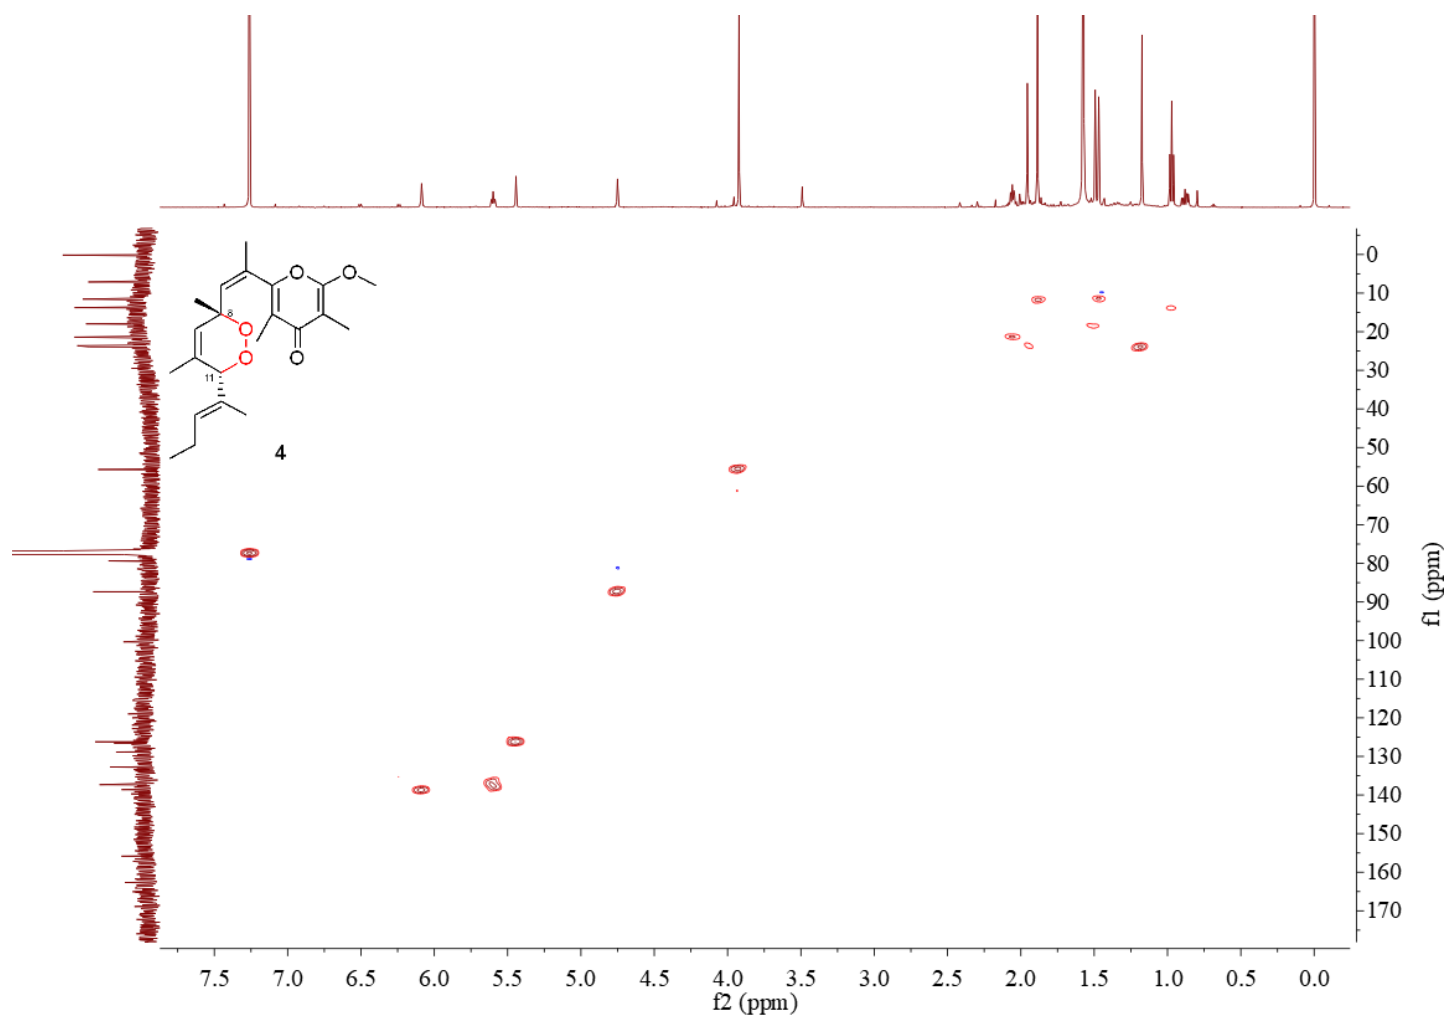

**Figure S52.** HSQC spectrum (600 MHz) of **4** in  $\text{CDCl}_3$ .

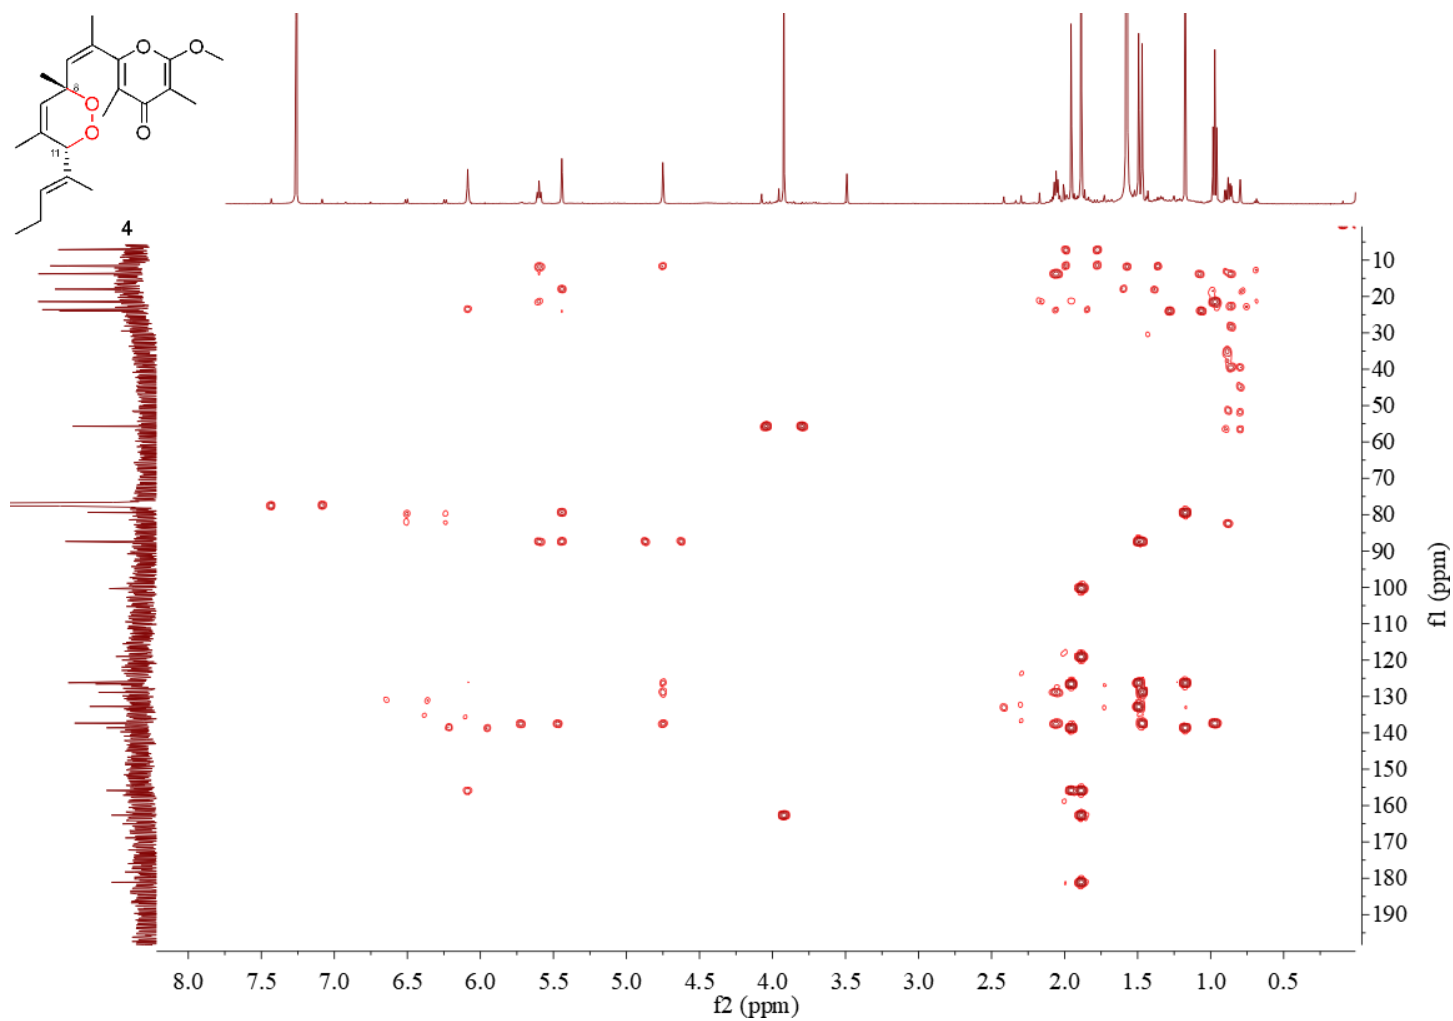

**Figure S53.** HMBC spectrum (600 MHz) of **4** in CDCl<sub>3</sub>.

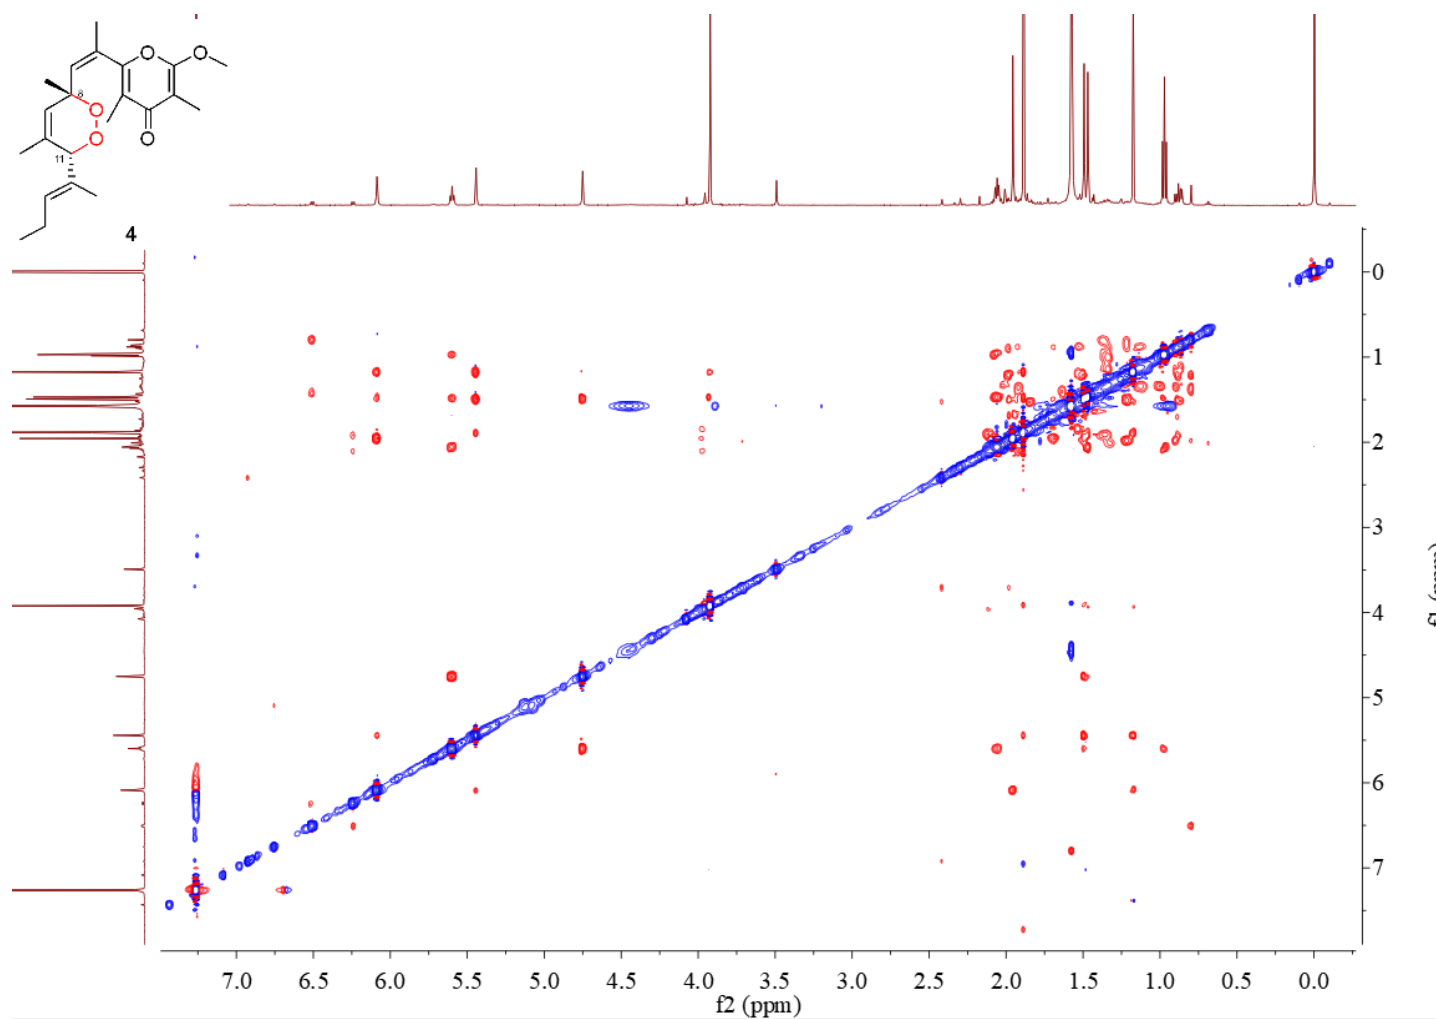

**Figure S54.** NOESY spectrum (600 MHz) of **4** in  $\text{CDCl}_3$ .

# User Spectra

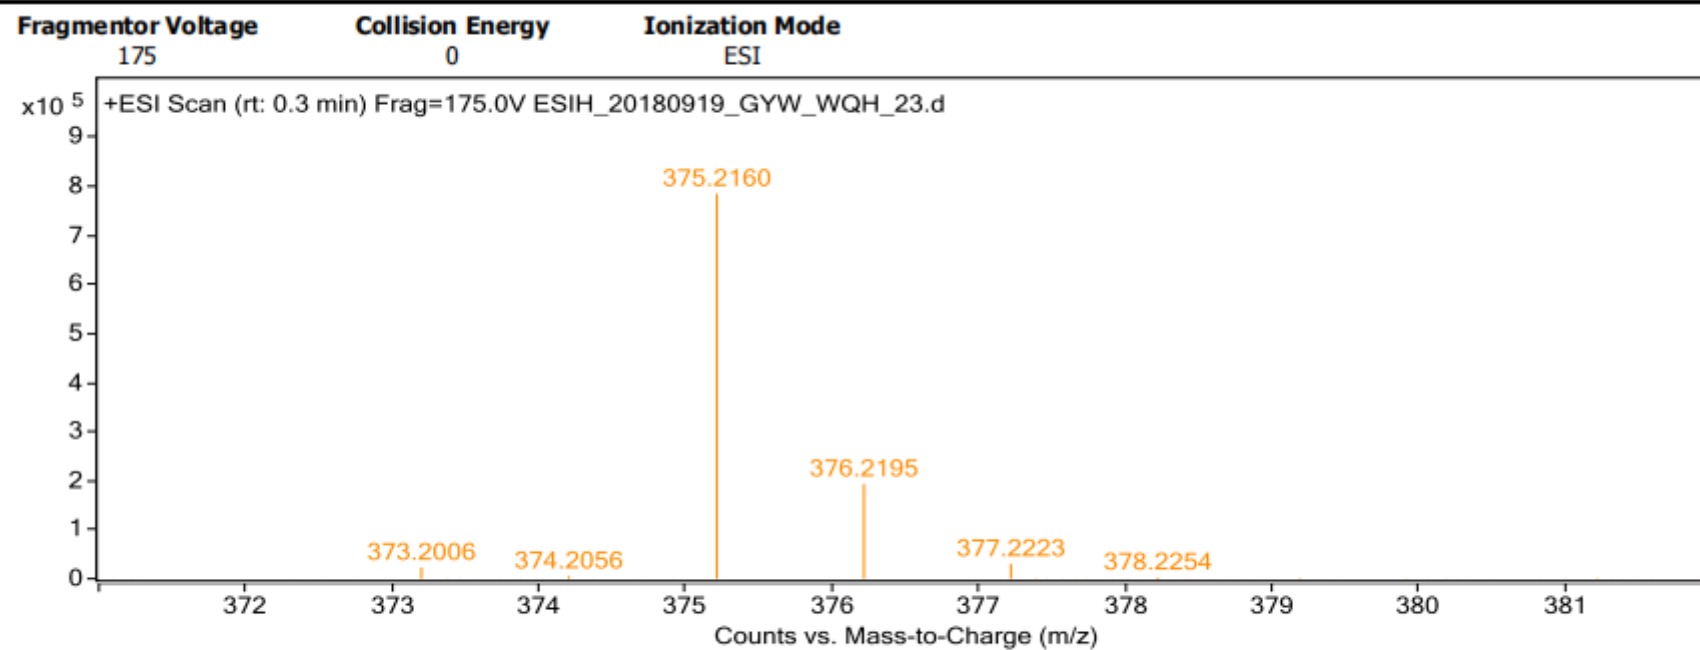

## Formula Calculator Results

| m/z     | Calc m/z | Diff (mDa) | Diff (ppm) | Ion Formula | Ion    |
|---------|----------|------------|------------|-------------|--------|
| 375.216 | 375.2166 | 0.56       | 1.5        | C22 H31 O5  | (M+H)+ |

Figure S55. HR-ESI-MS (positive mode) spectrum of **4**.



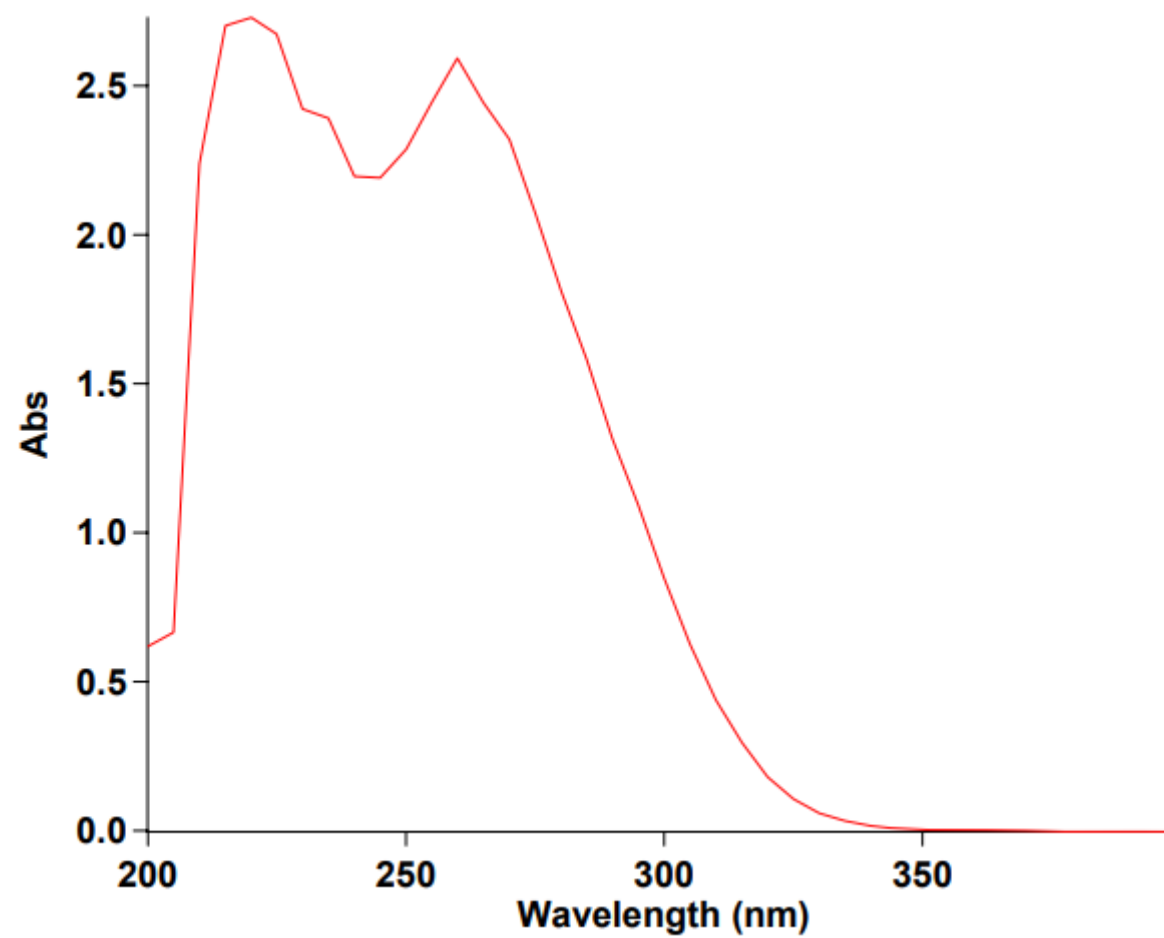

**Figure S56.** UV spectrum of **4**.

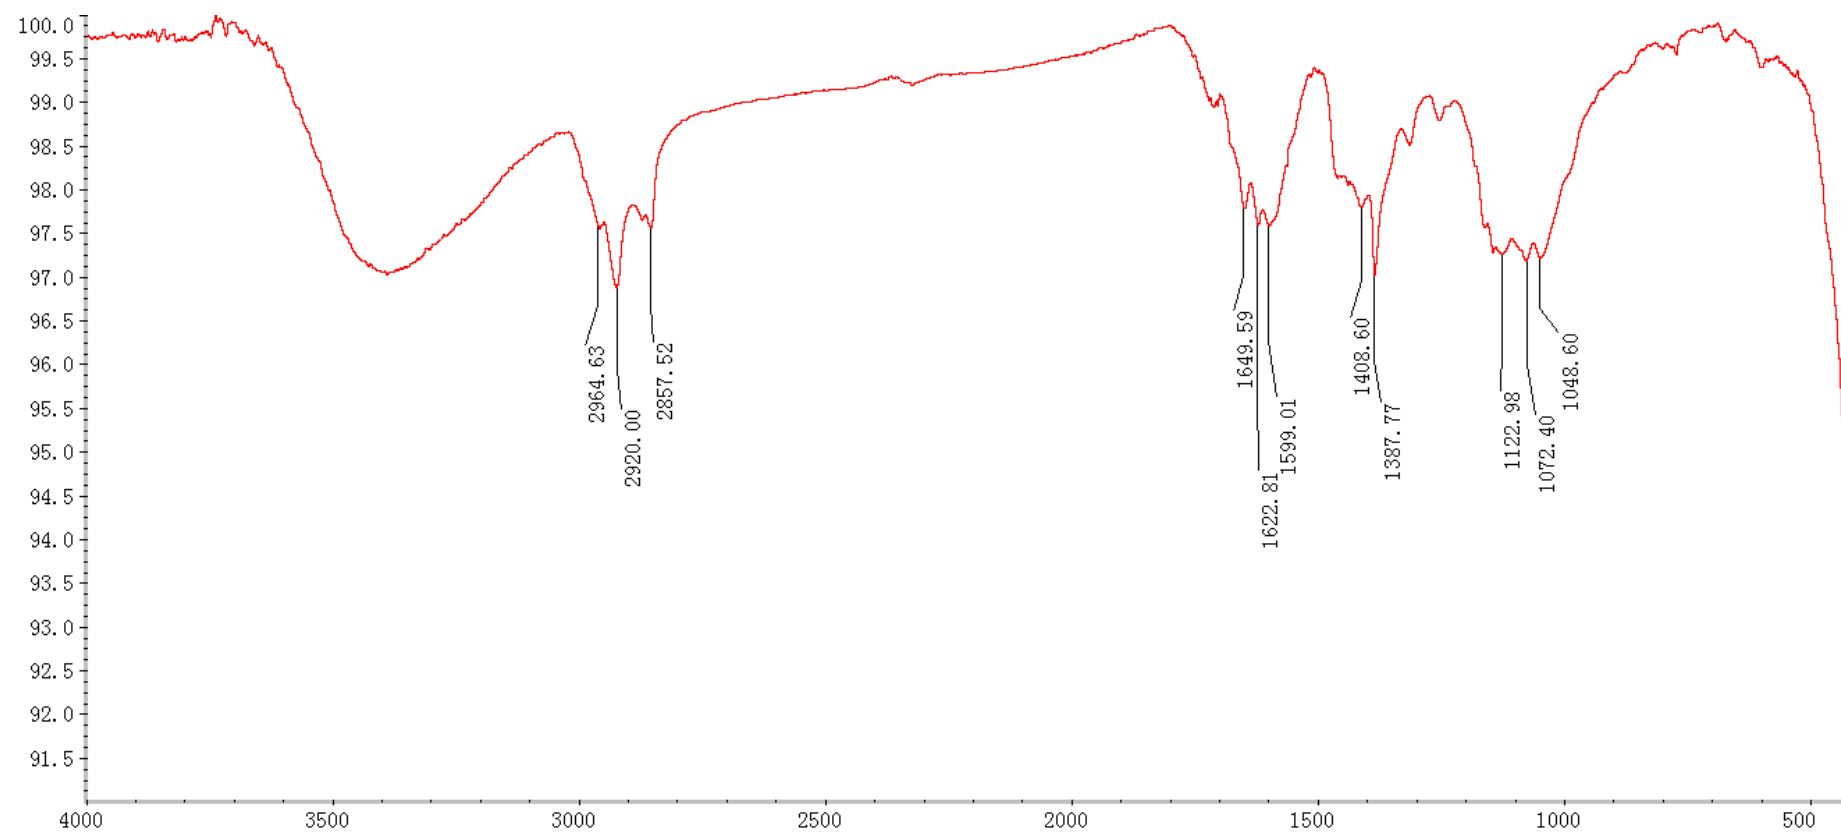

**Figure S57.** IR spectrum of **4**.

**1.9 NMR, HR-ESI-MS, IR, and UV spectra of ocellatuperoxide E (5)**

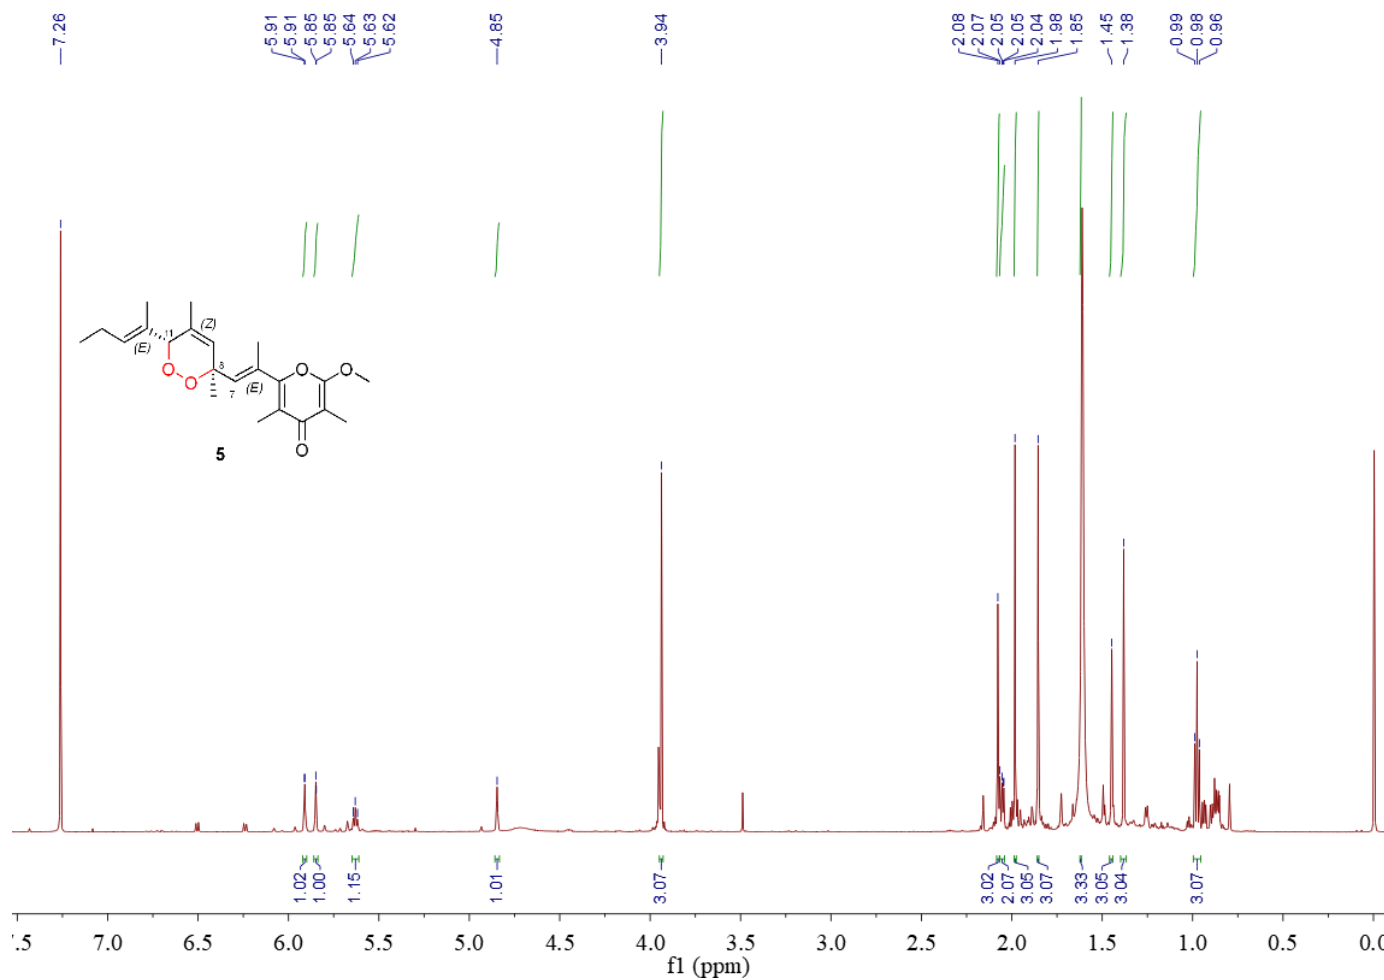

**Figure S58.**  $^1\text{H}$  NMR spectrum (600 MHz) of **5** in  $\text{CDCl}_3$ .

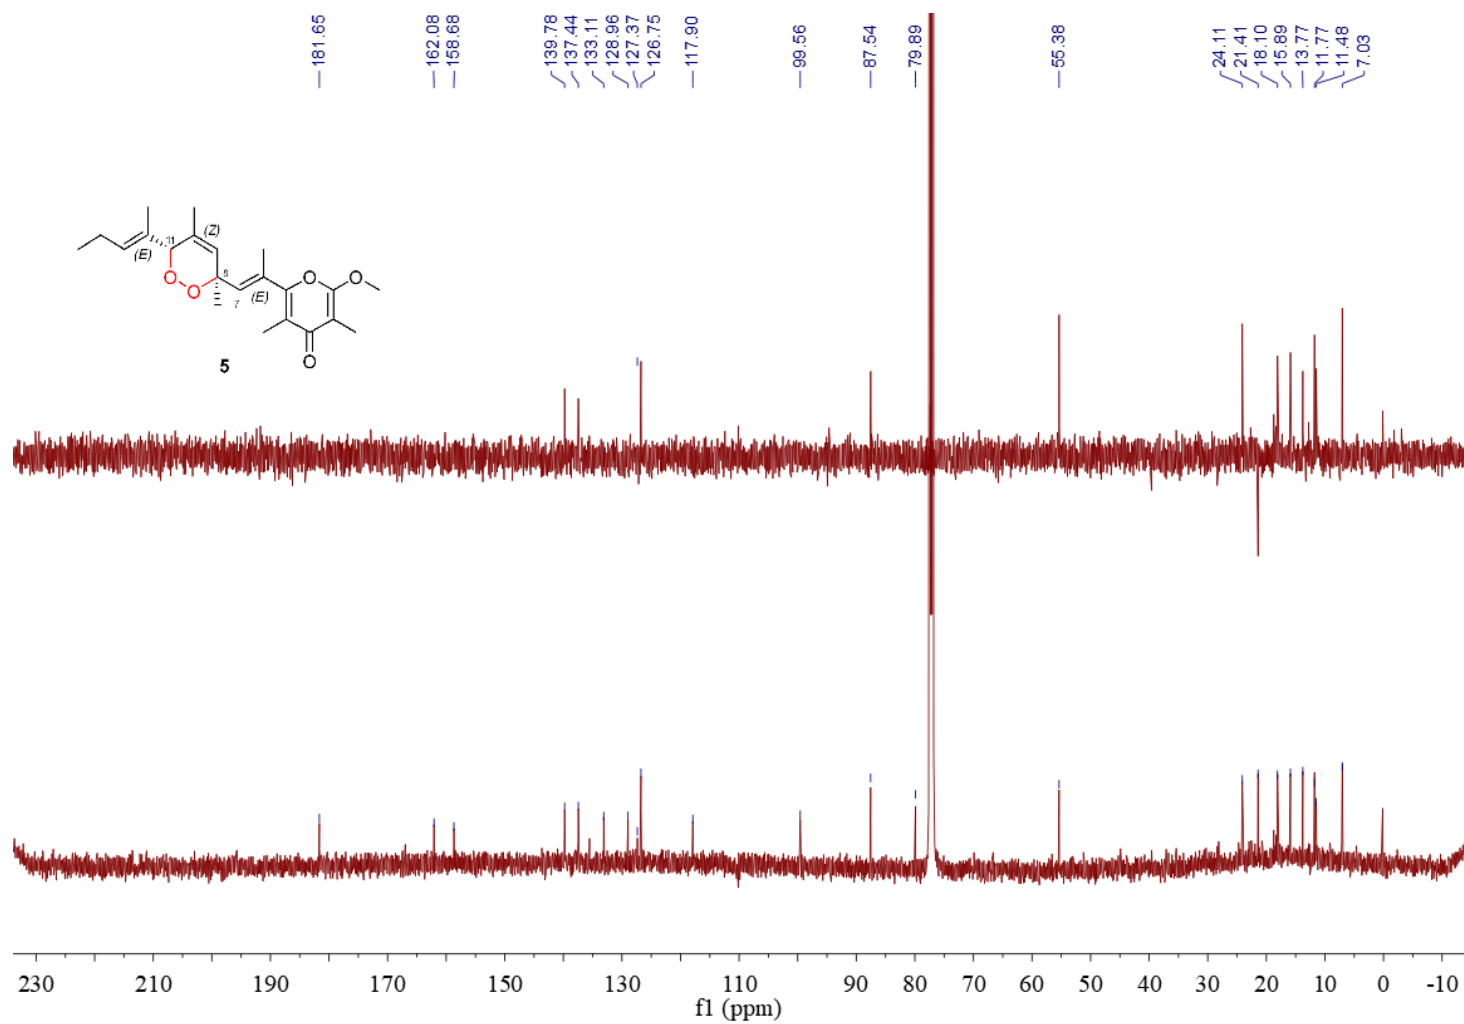

**Figure S59.**  $^{13}\text{C}$  NMR spectrum (150 MHz) of **5** in  $\text{CDCl}_3$ .

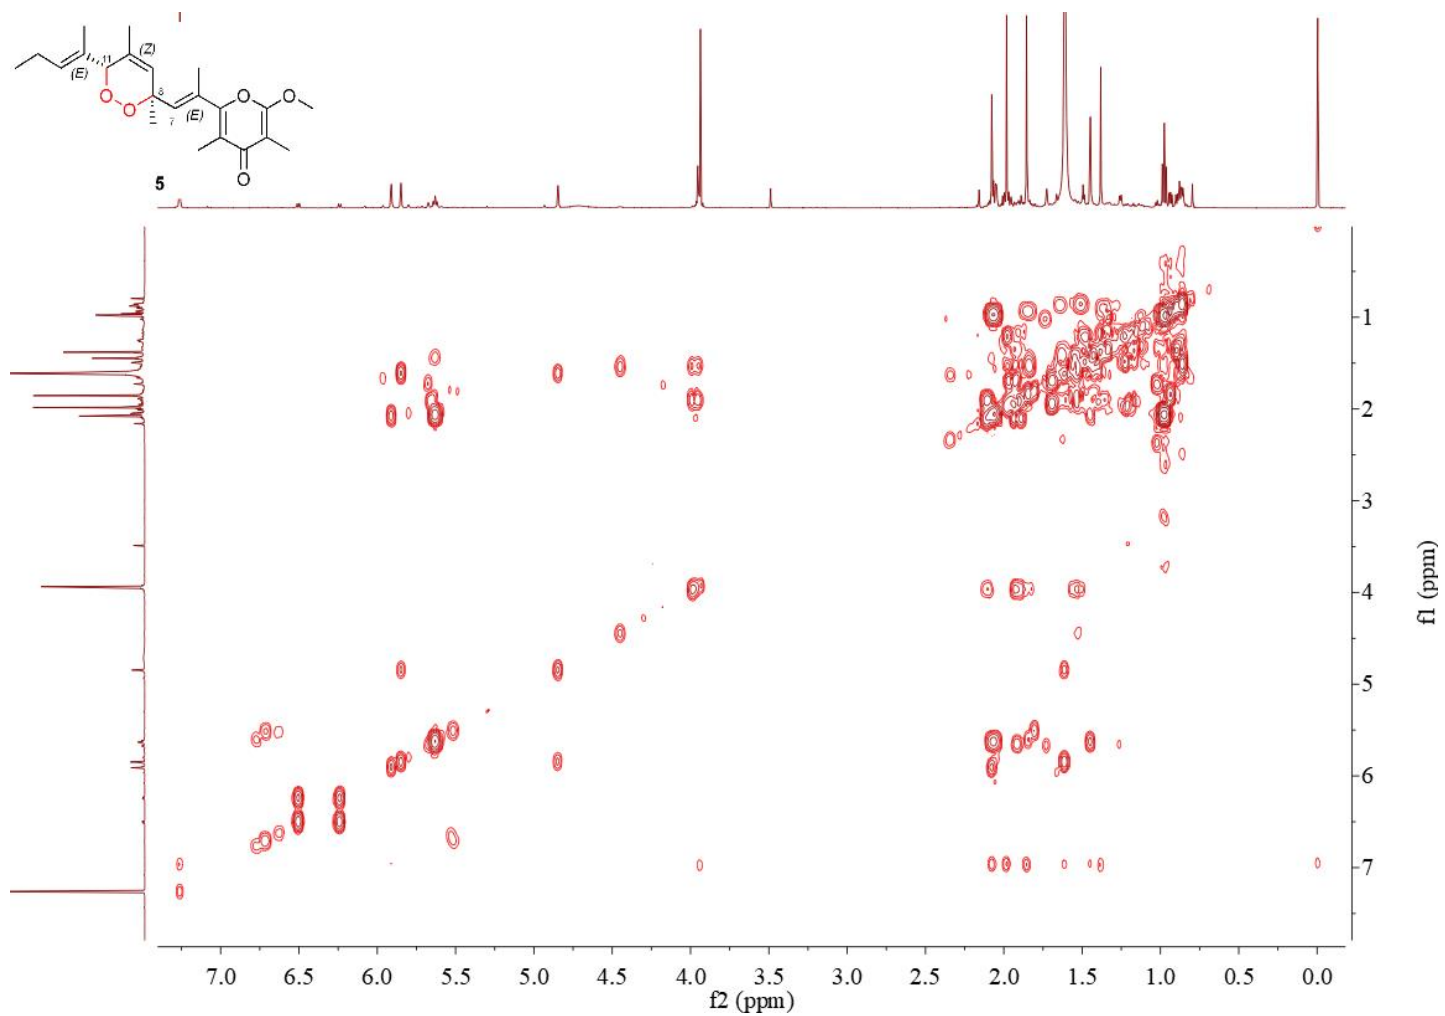

**Figure S60.**  $^1\text{H}$ - $^1\text{H}$  COSY spectrum (600 MHz) of **5** in  $\text{CDCl}_3$ .

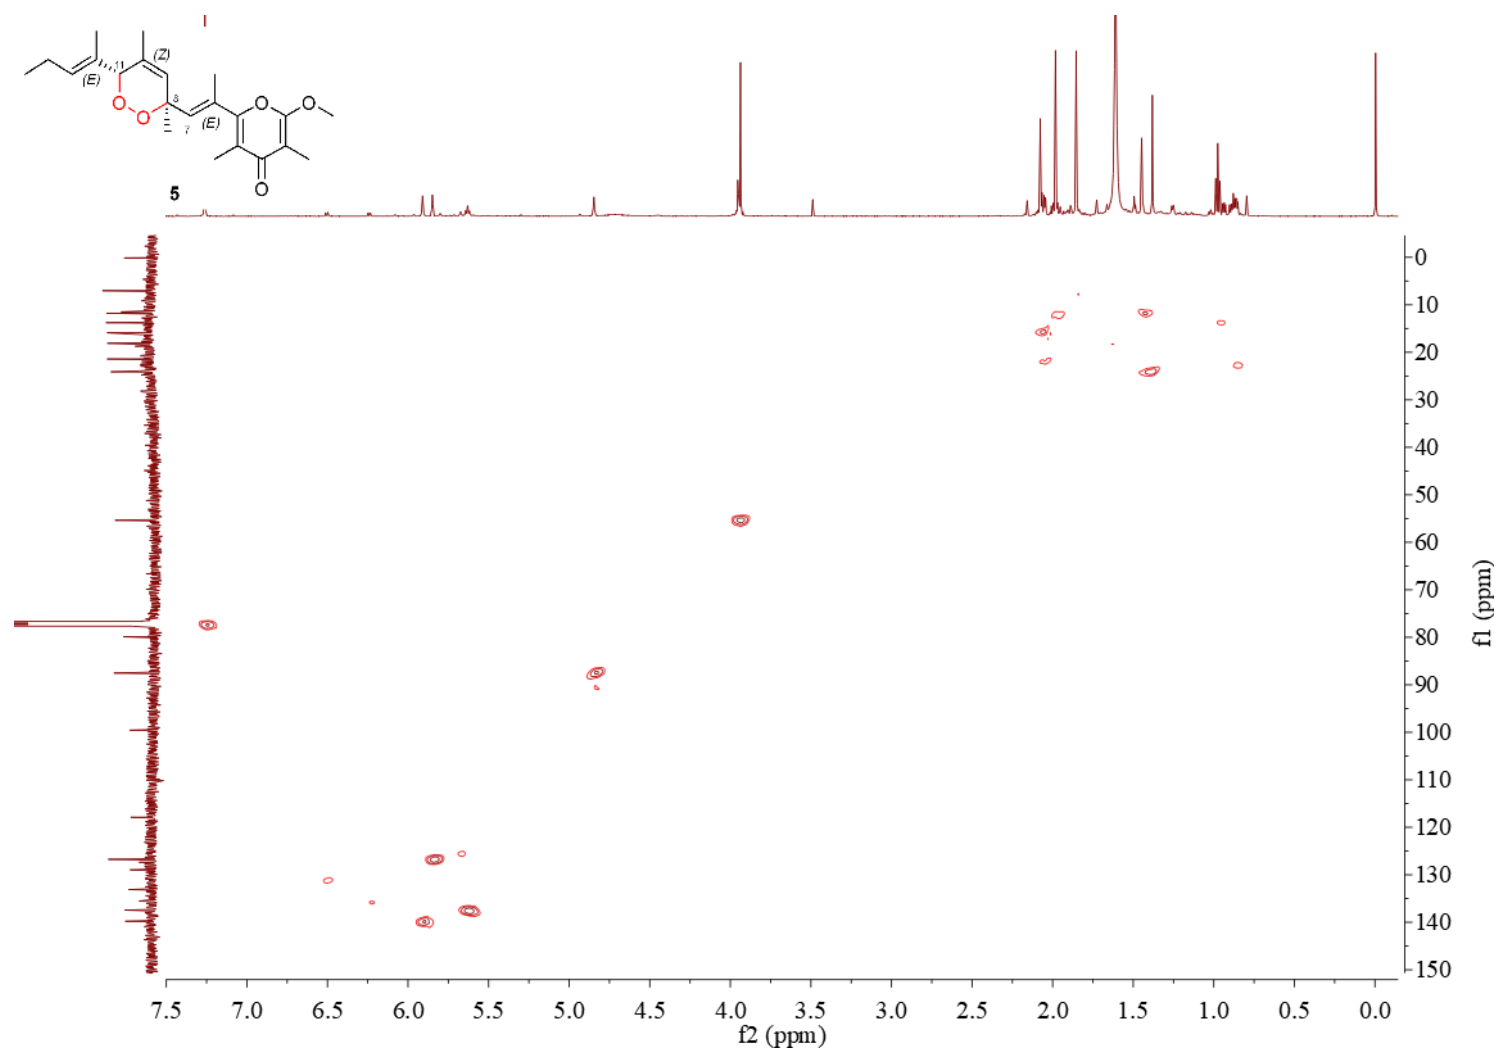

**Figure S61.** HSQC spectrum (600 MHz) of **5** in CDCl<sub>3</sub>.

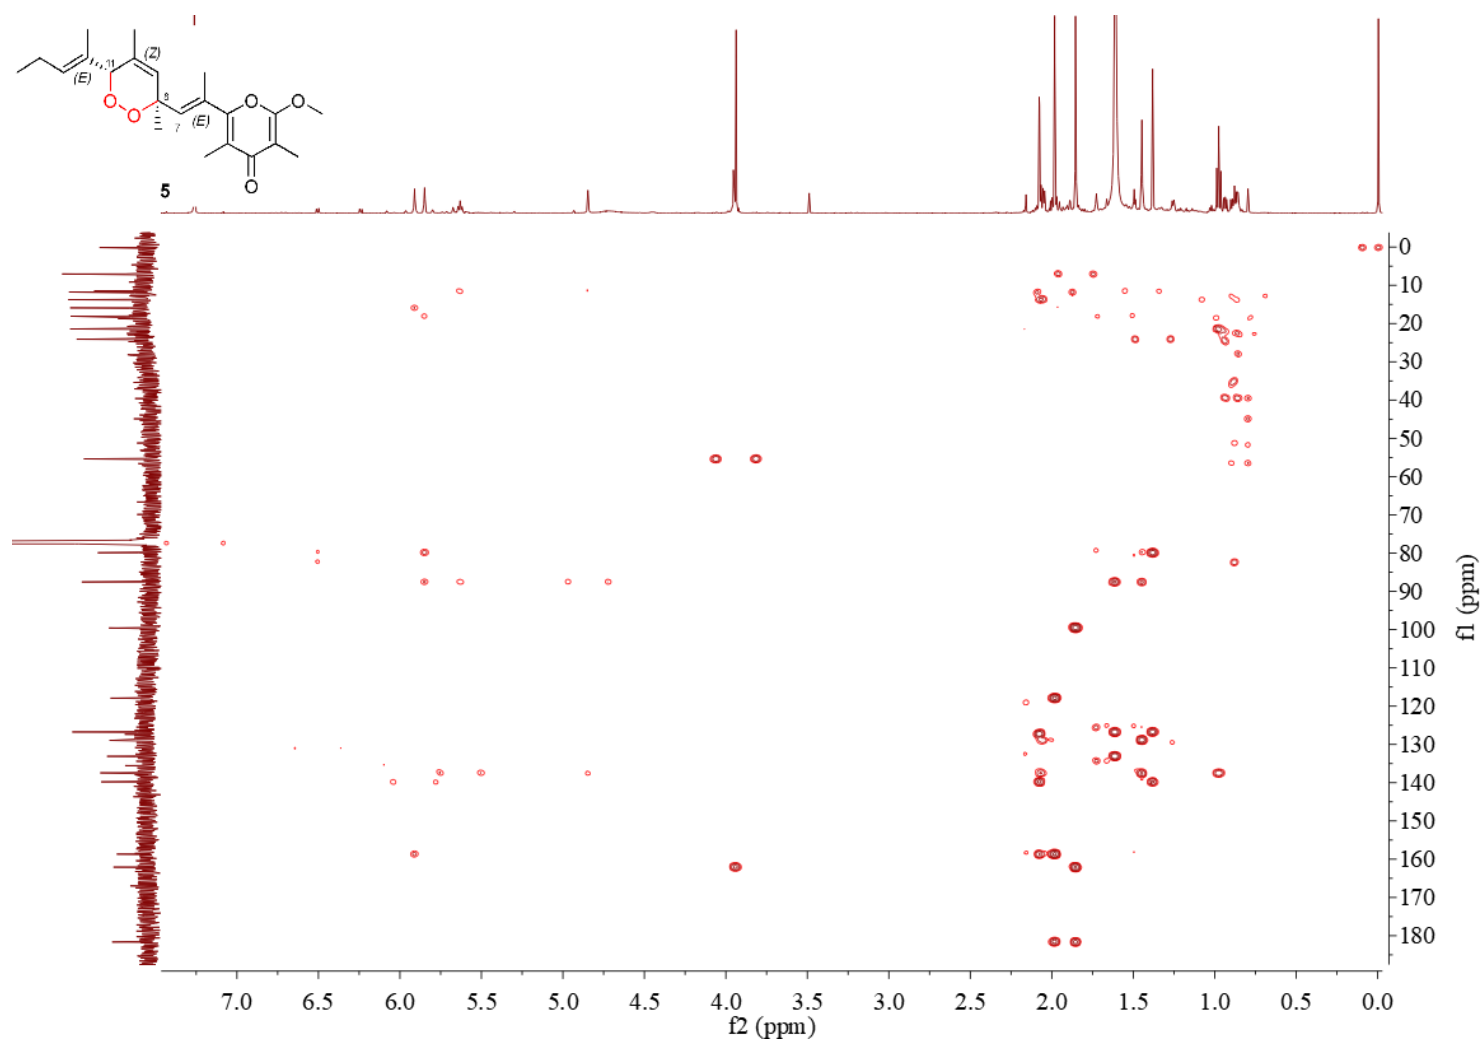

**Figure S62.** HMBC spectrum (600 MHz) of **5** in CDCl<sub>3</sub>.

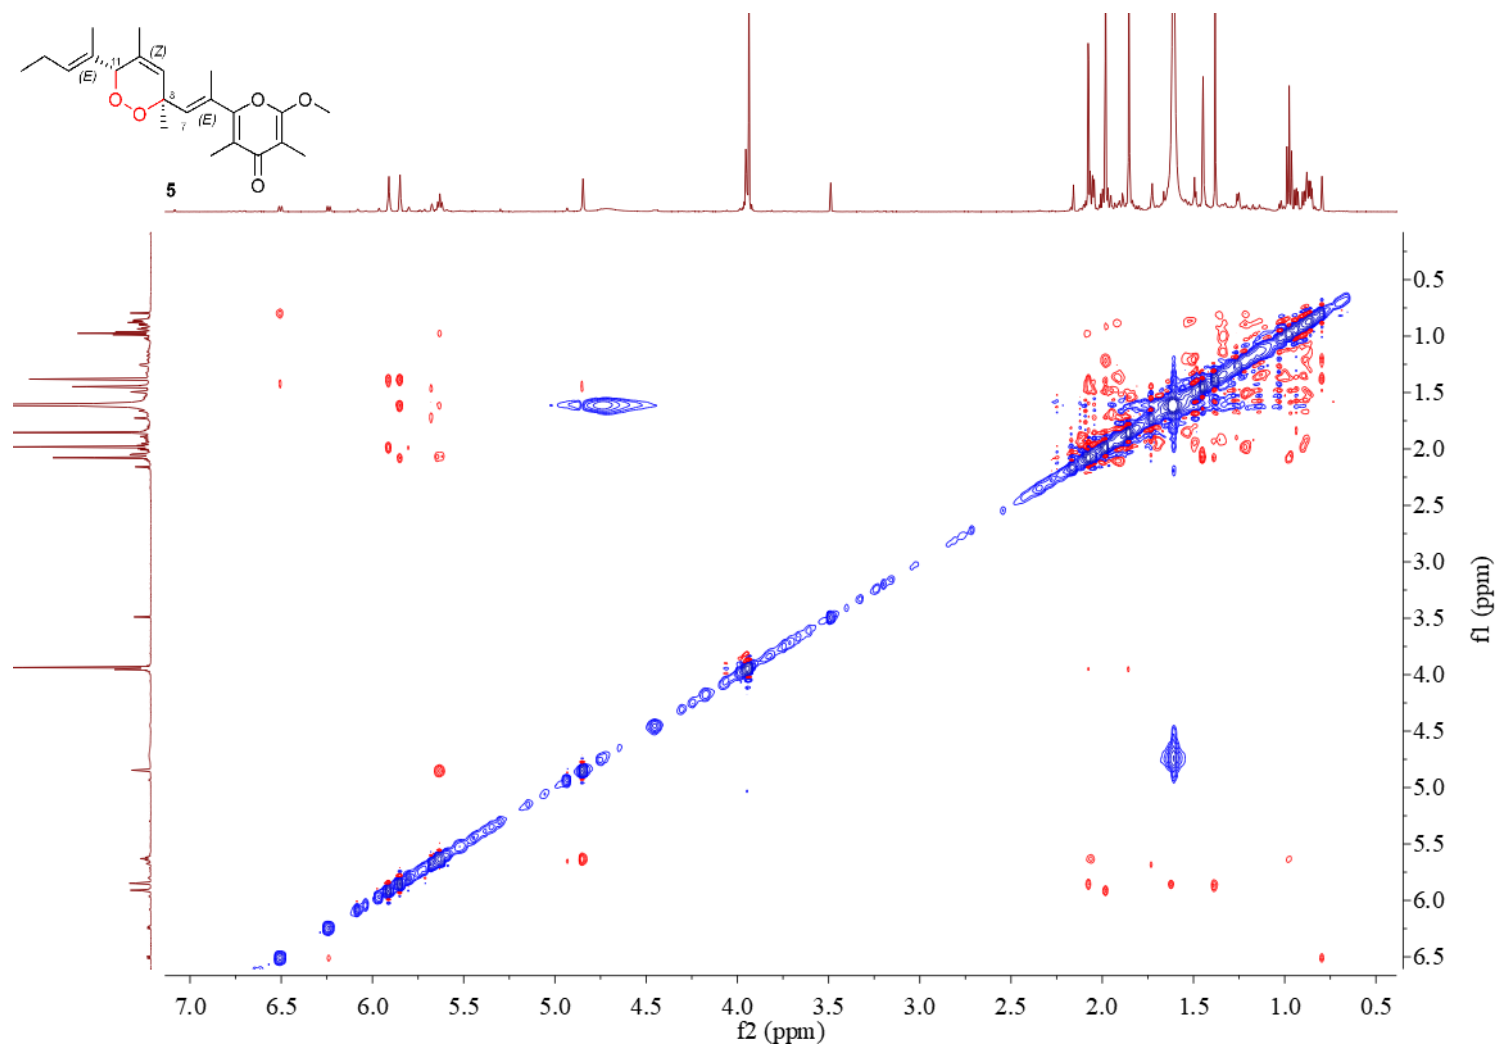

**Figure S63.** NOESY spectrum (600 MHz) of **5** in CDCl<sub>3</sub>.



# User Spectra

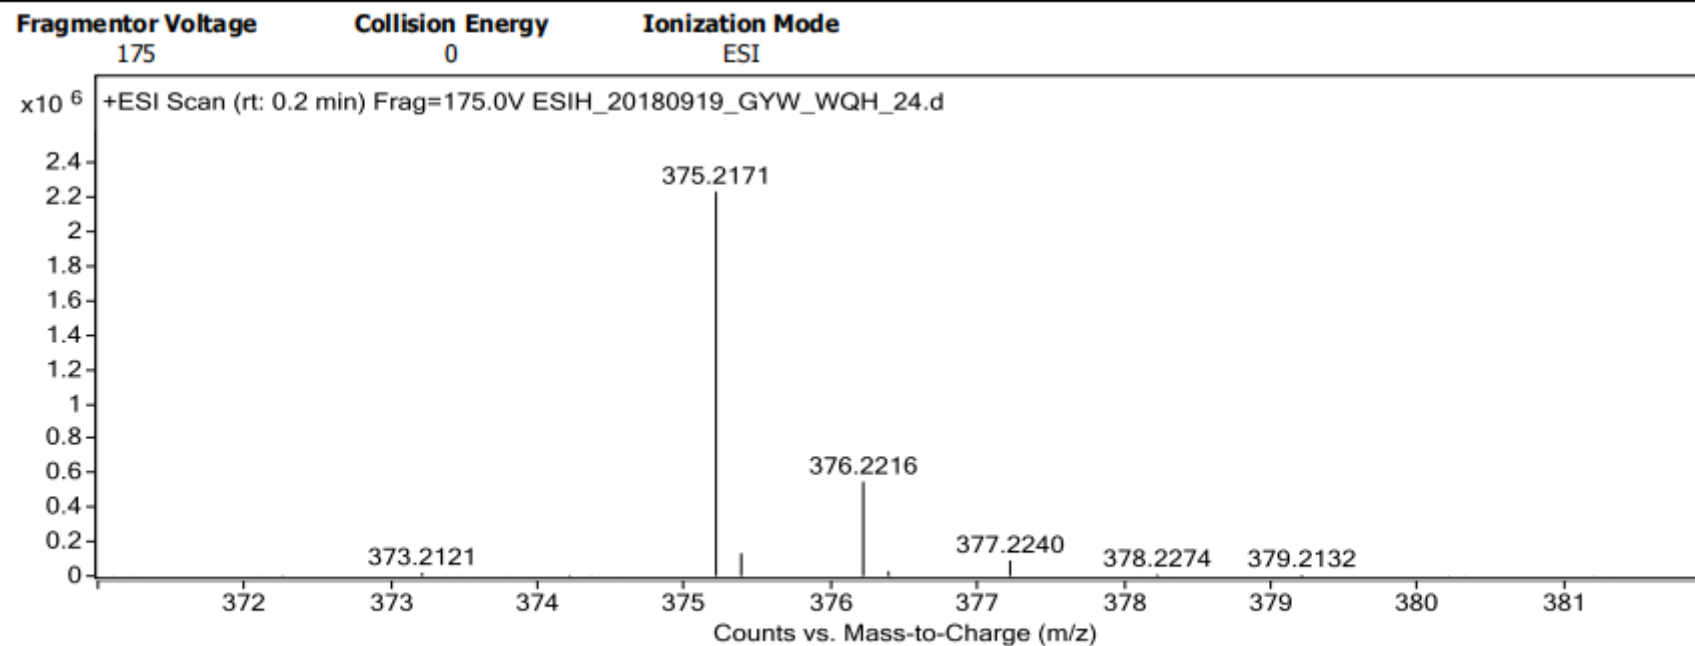

## Formula Calculator Results

| m/z      | Calc m/z | Diff (mDa) | Diff (ppm) | Ion Formula | Ion                |
|----------|----------|------------|------------|-------------|--------------------|
| 375.2171 | 375.2166 | -0.46      | -1.23      | C22 H31 O5  | (M+H) <sup>+</sup> |

**Figure S64.** HR-ESI-MS (positive mode) spectrum of **5**.

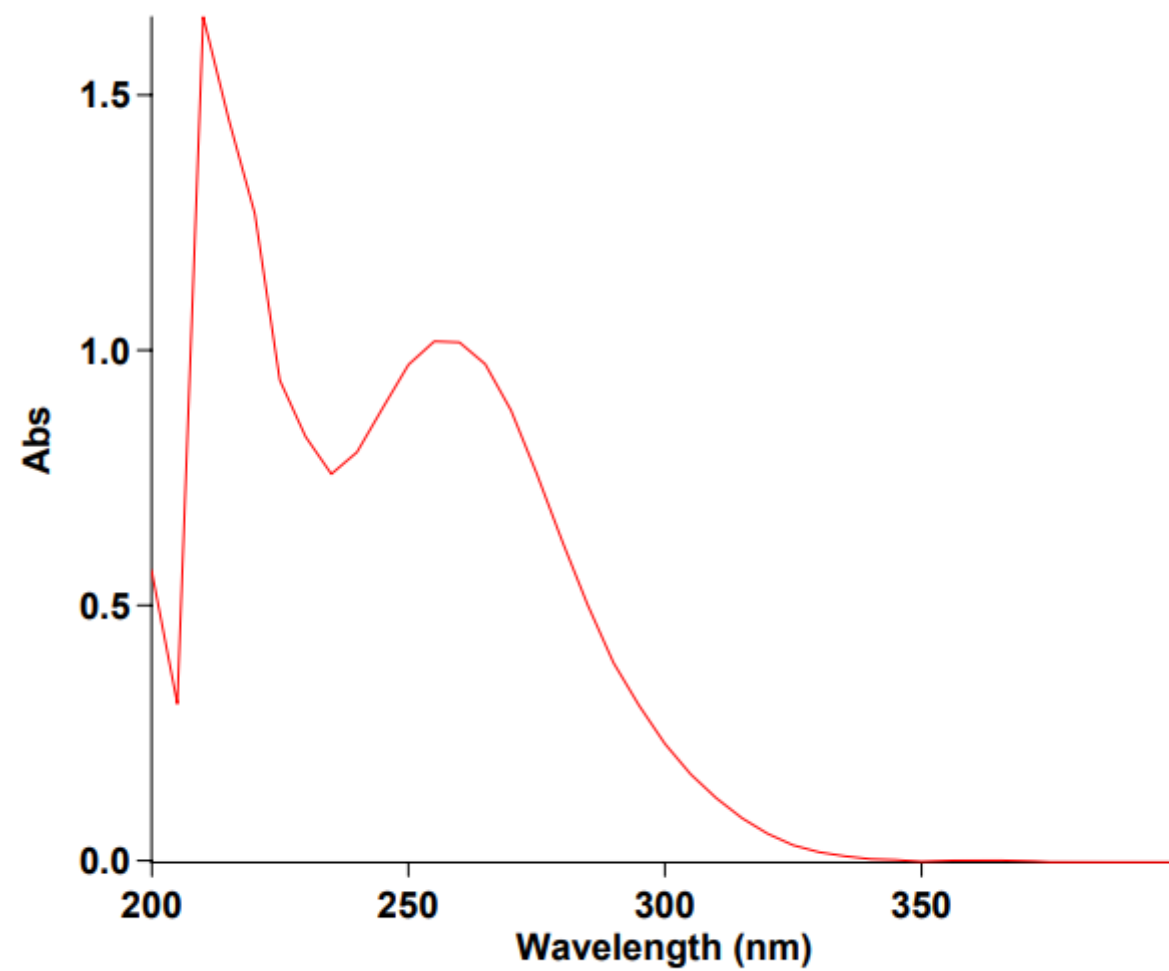

**Figure S65.** UV spectrum of **5**.

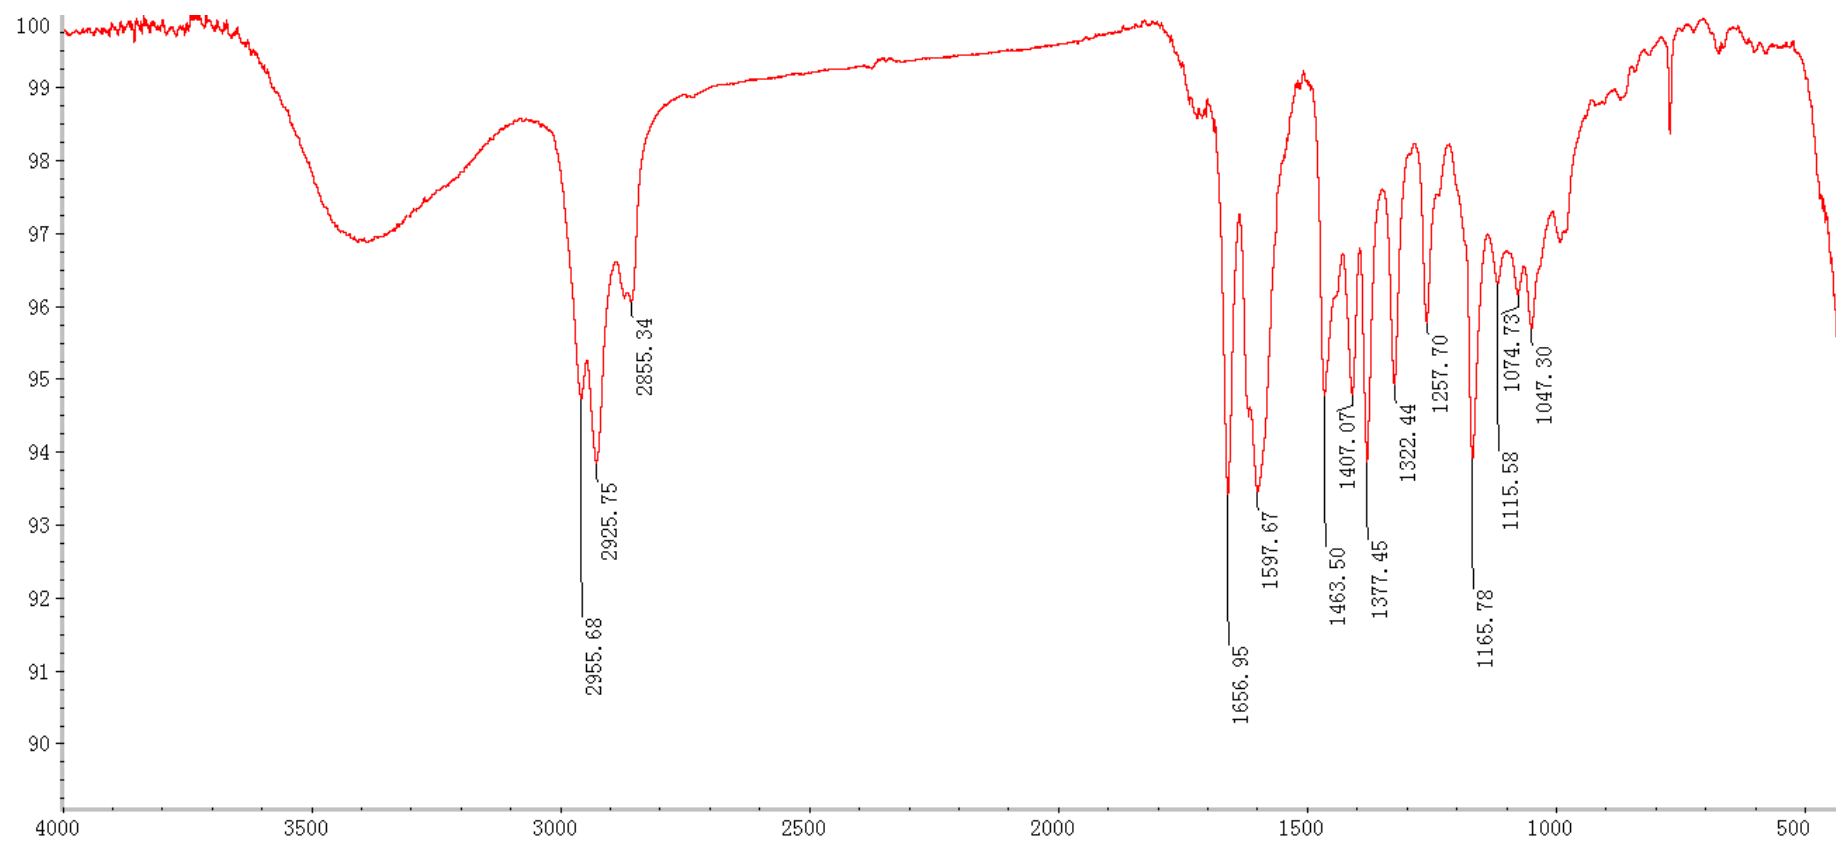

**Figure S66.** IR spectrum of **5**.

**1.10 NMR, HR-ESI-MS, IR, and UV spectra of ocellatuperoxide F (6)**

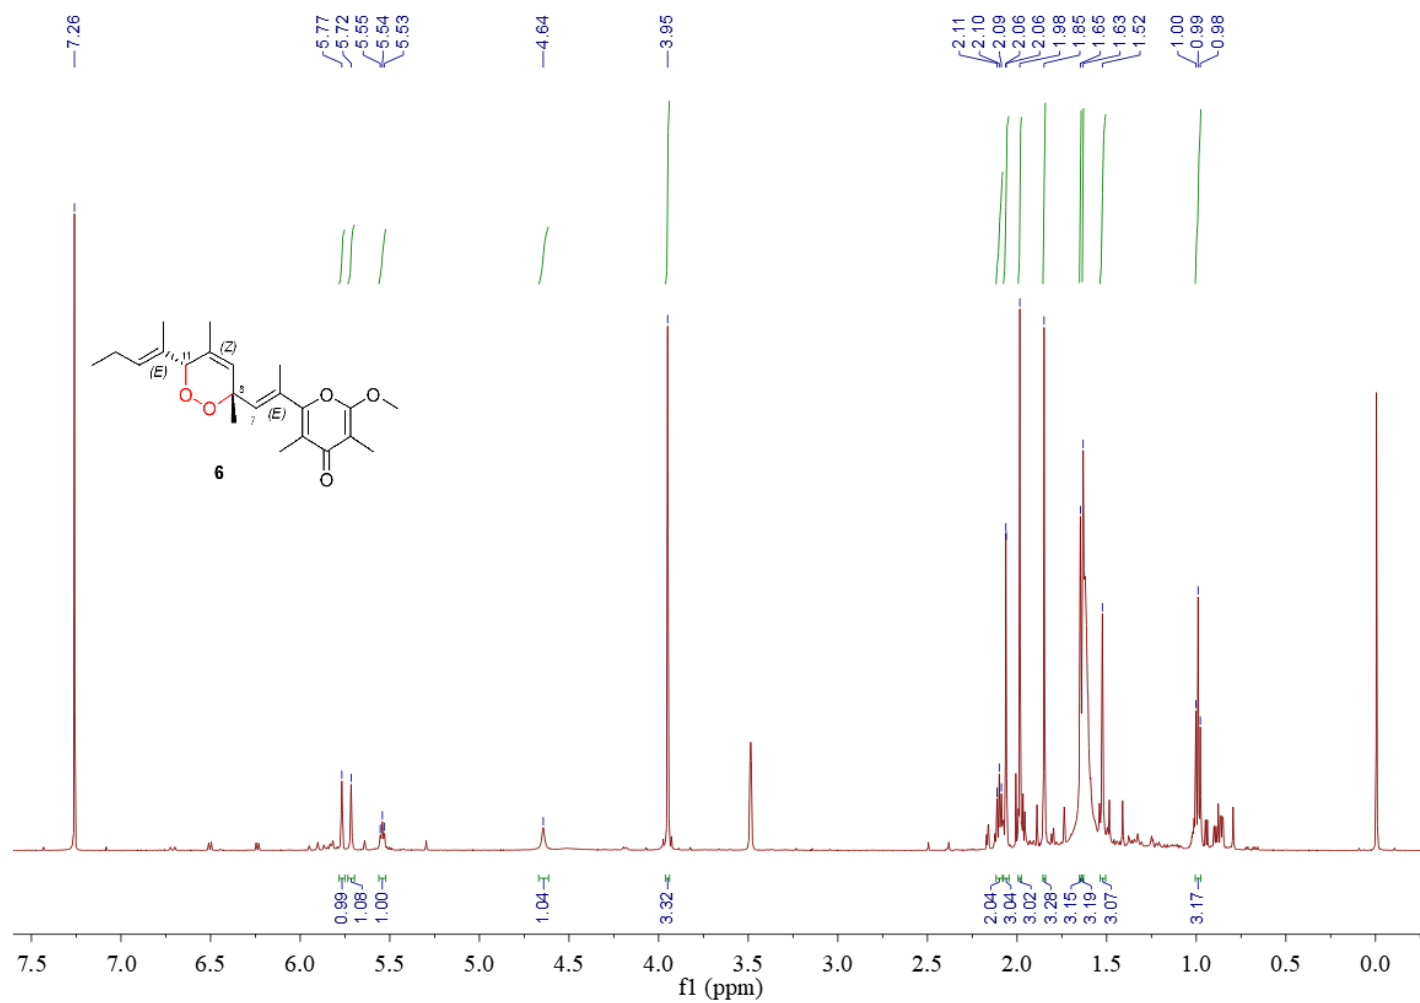

**Figure S67.**  $^1\text{H}$  NMR spectrum (600 MHz) of 6 in  $\text{CDCl}_3$ .

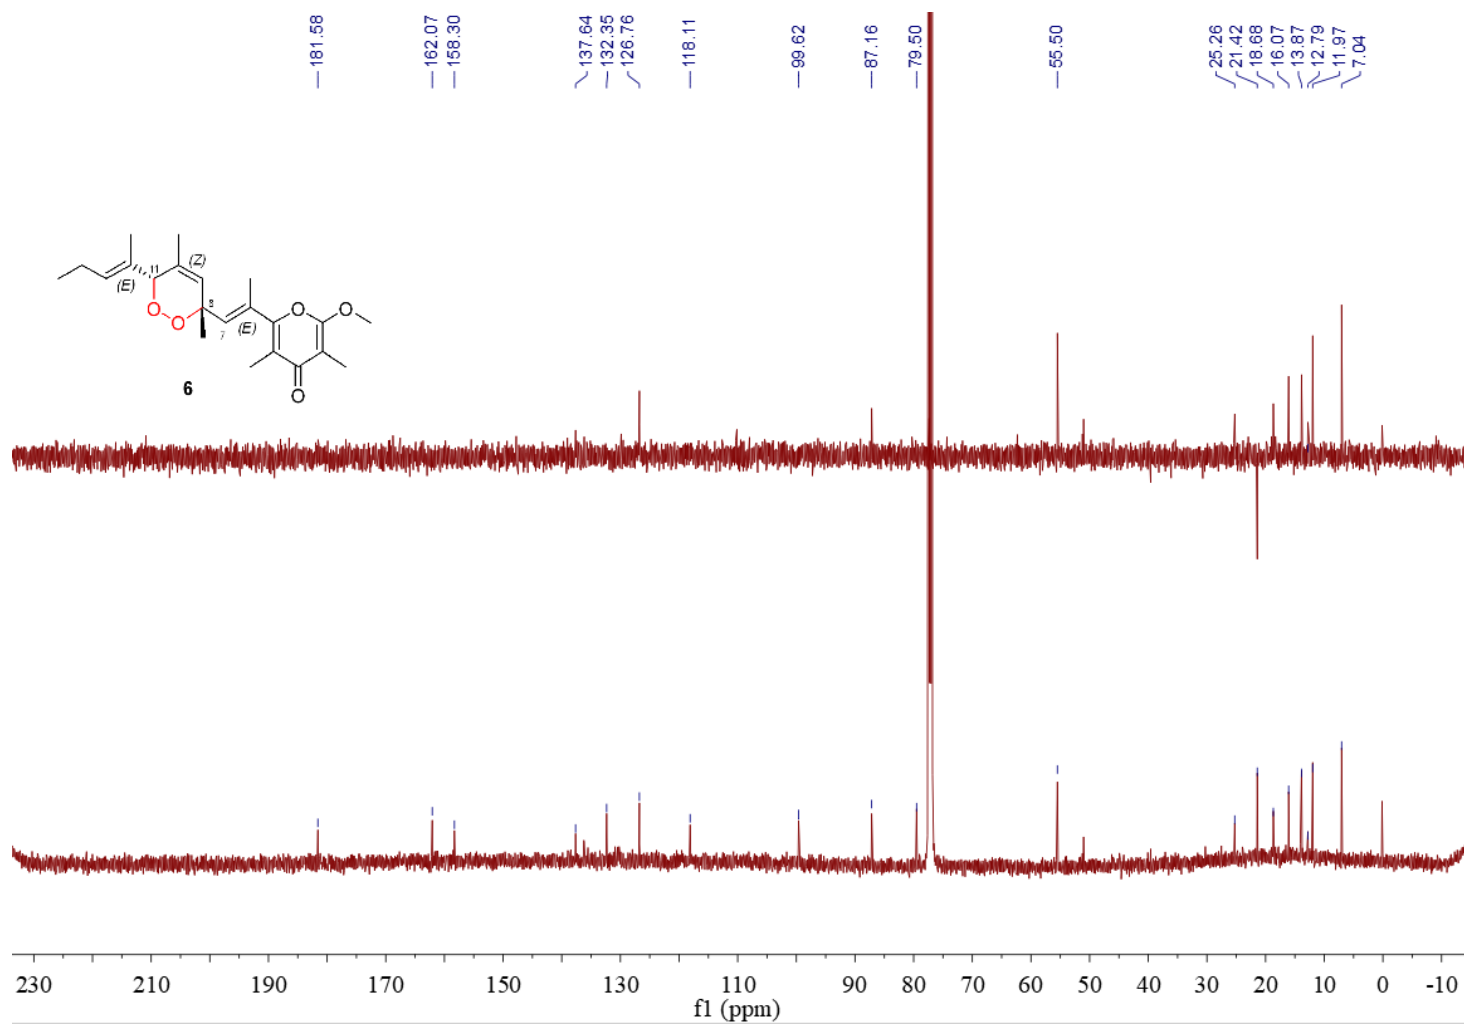

**Figure S68.**  $^{13}\text{C}$  NMR spectrum (150 MHz) of **6** in  $\text{CDCl}_3$ .

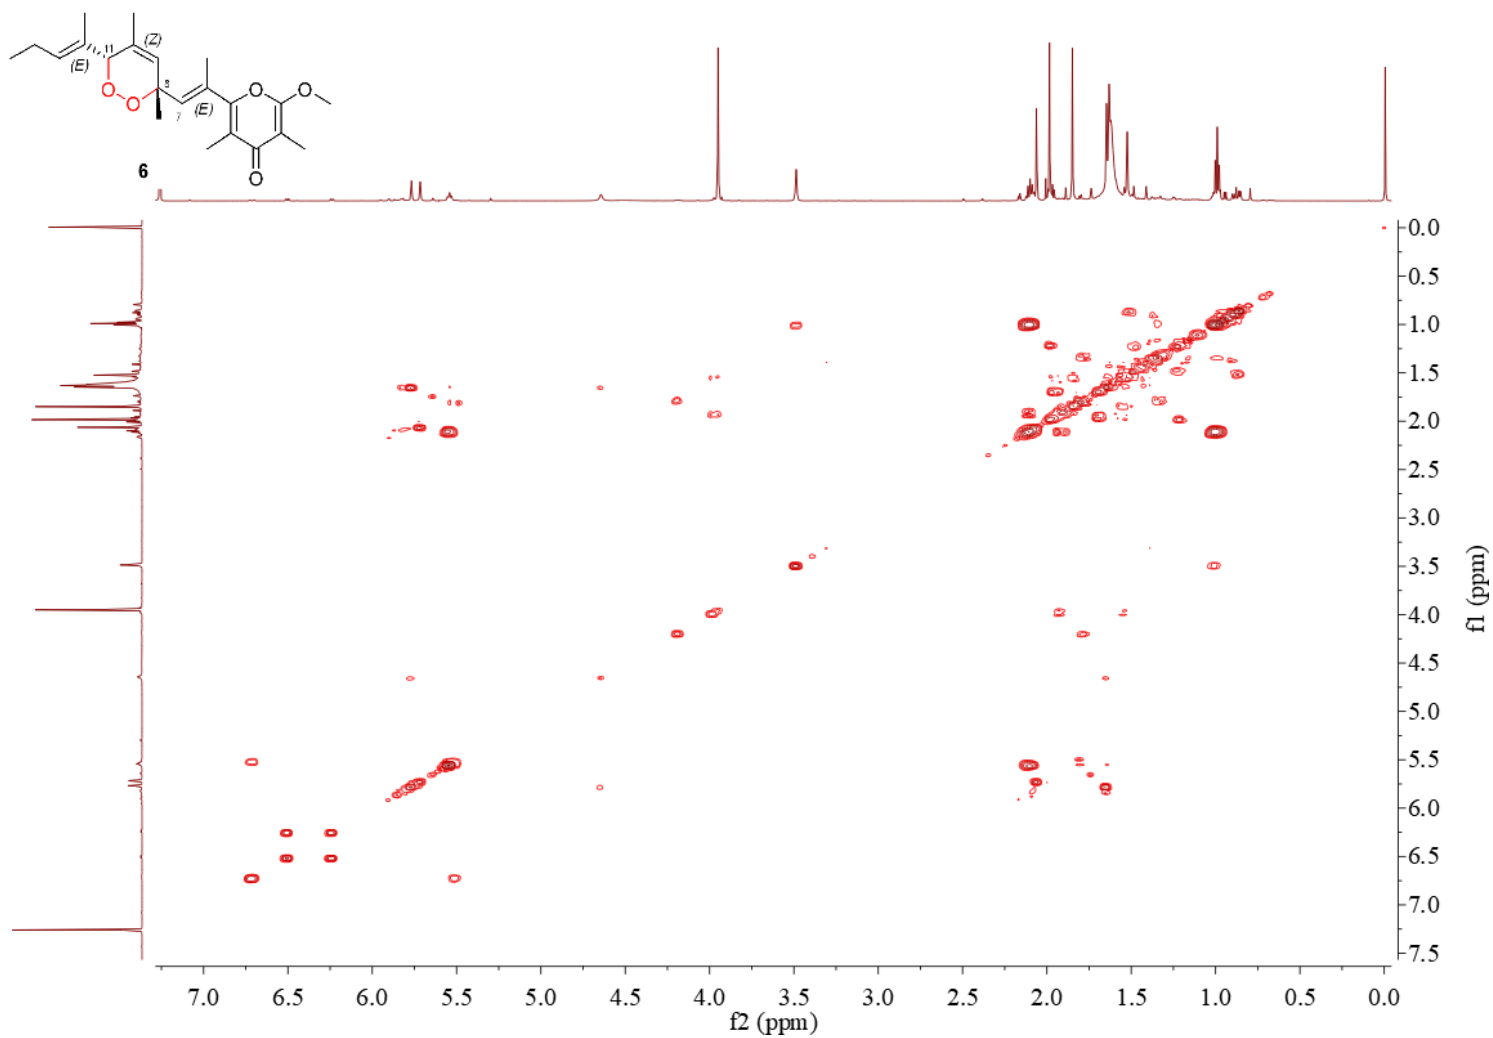

**Figure S69.**  $^1\text{H}$ - $^1\text{H}$  COSY spectrum (600 MHz) of **6** in  $\text{CDCl}_3$ .

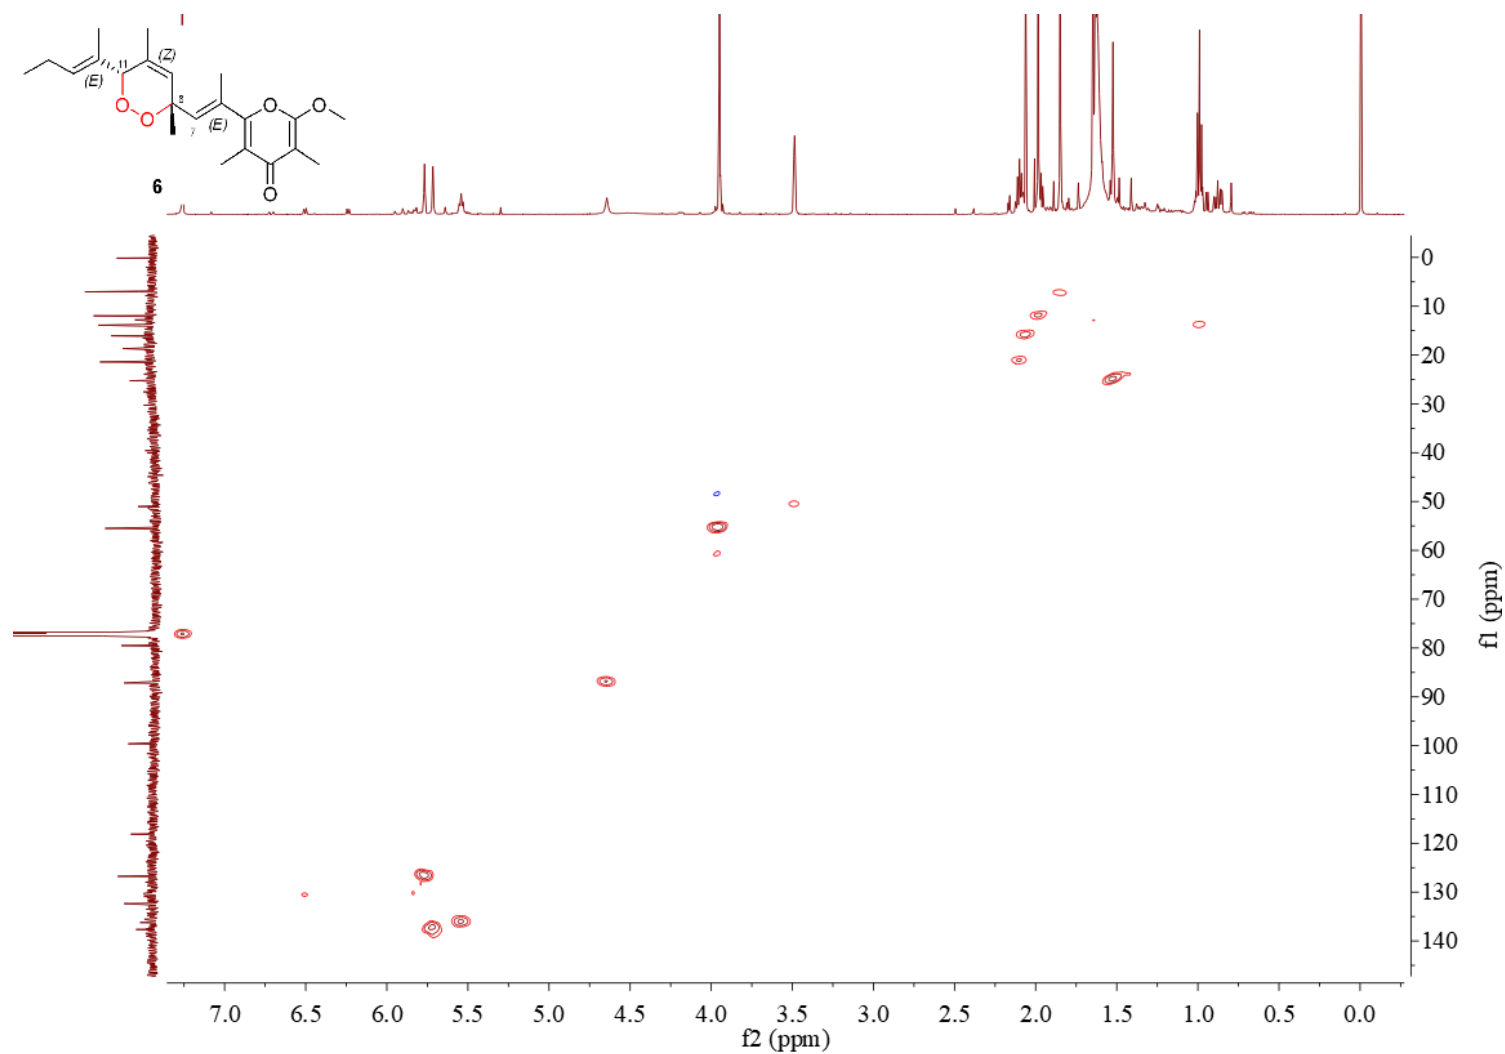

**Figure S70.** HSQC spectrum (600 MHz) of **6** in CDCl<sub>3</sub>.

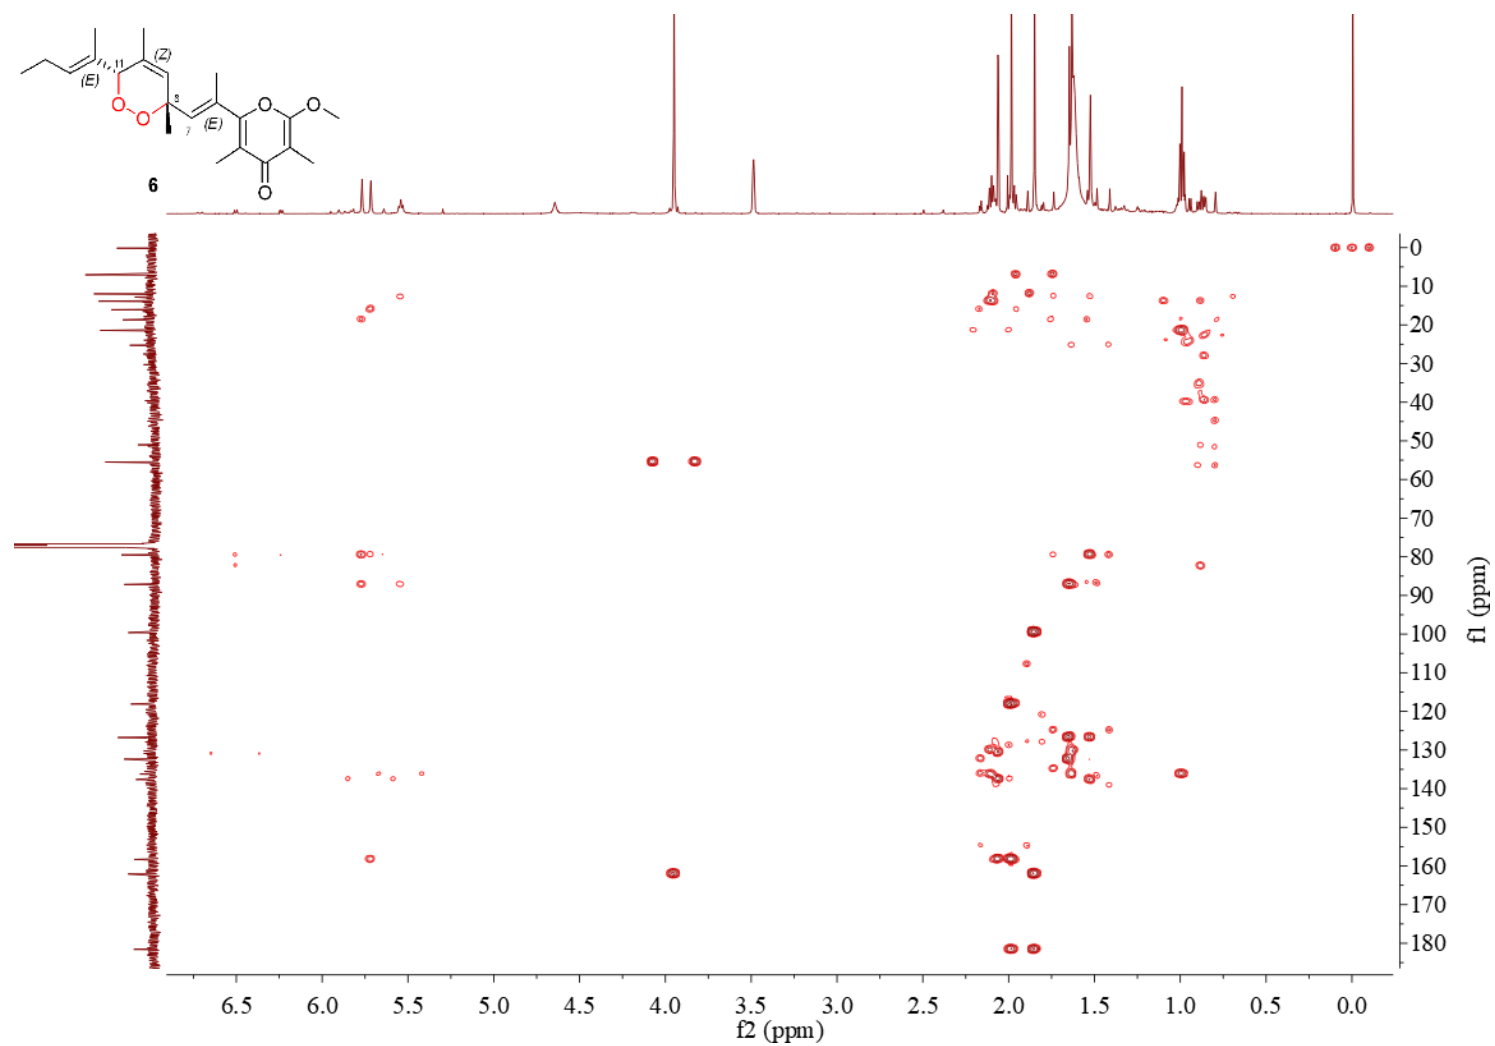

**Figure S71.** HMBC spectrum (600 MHz) of **6** in CDCl<sub>3</sub>.



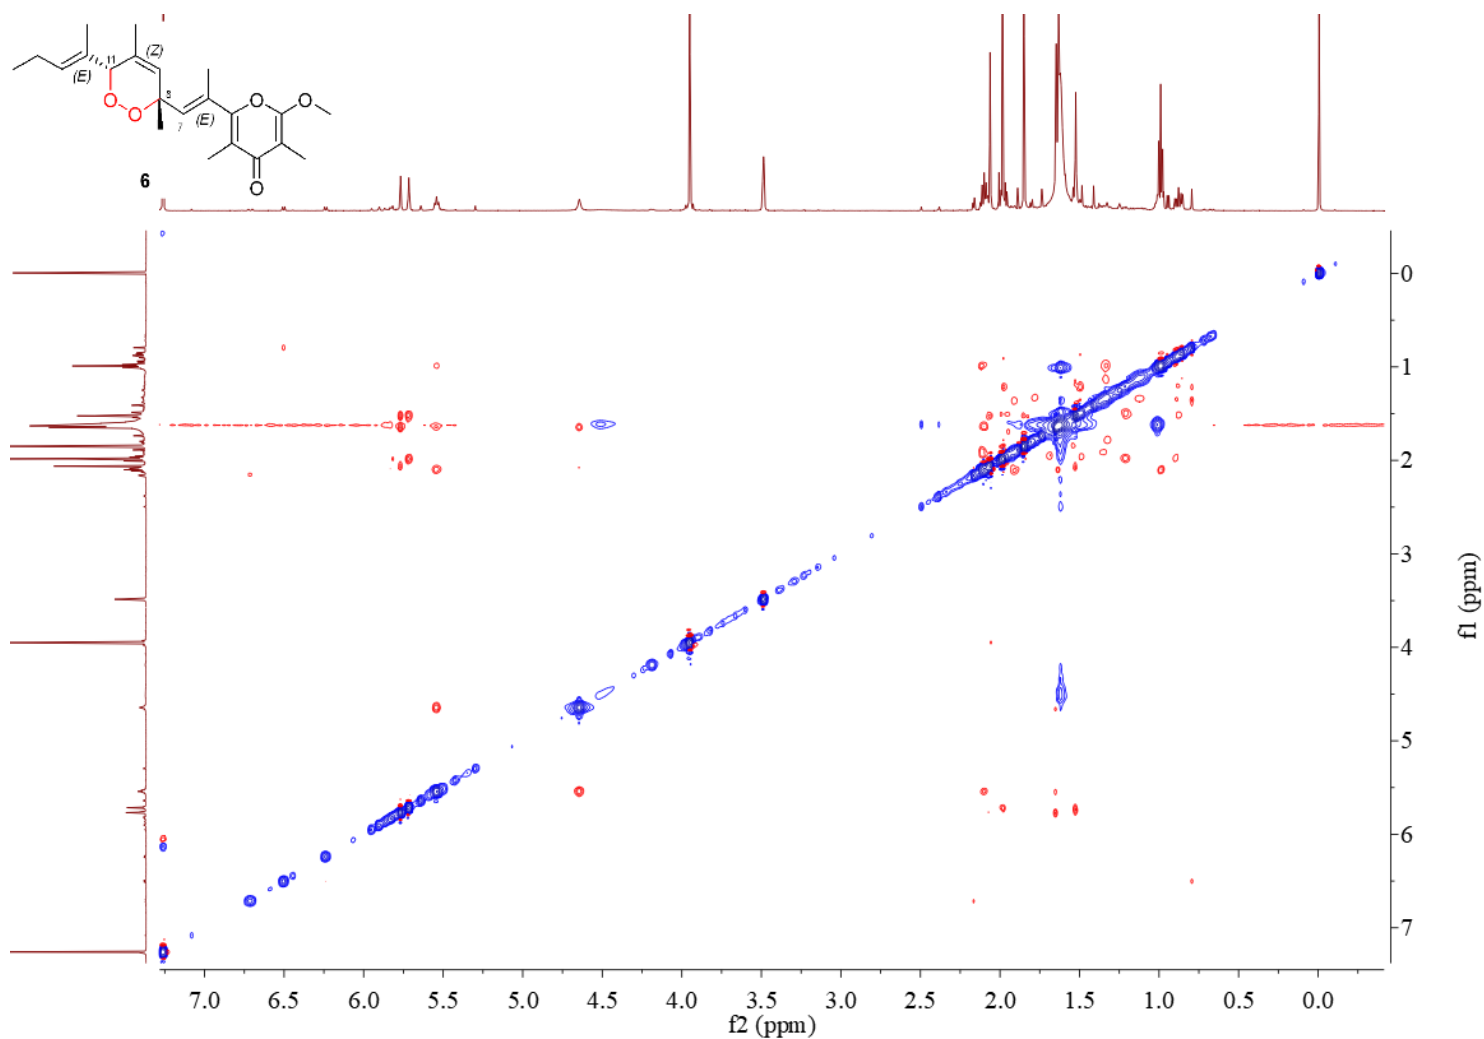

**Figure S72.** NOESY spectrum (600 MHz) of **6** in CDCl<sub>3</sub>.

# User Spectra

Fragmentor Voltage  
175

Collision Energy  
0

Ionization Mode  
ESI

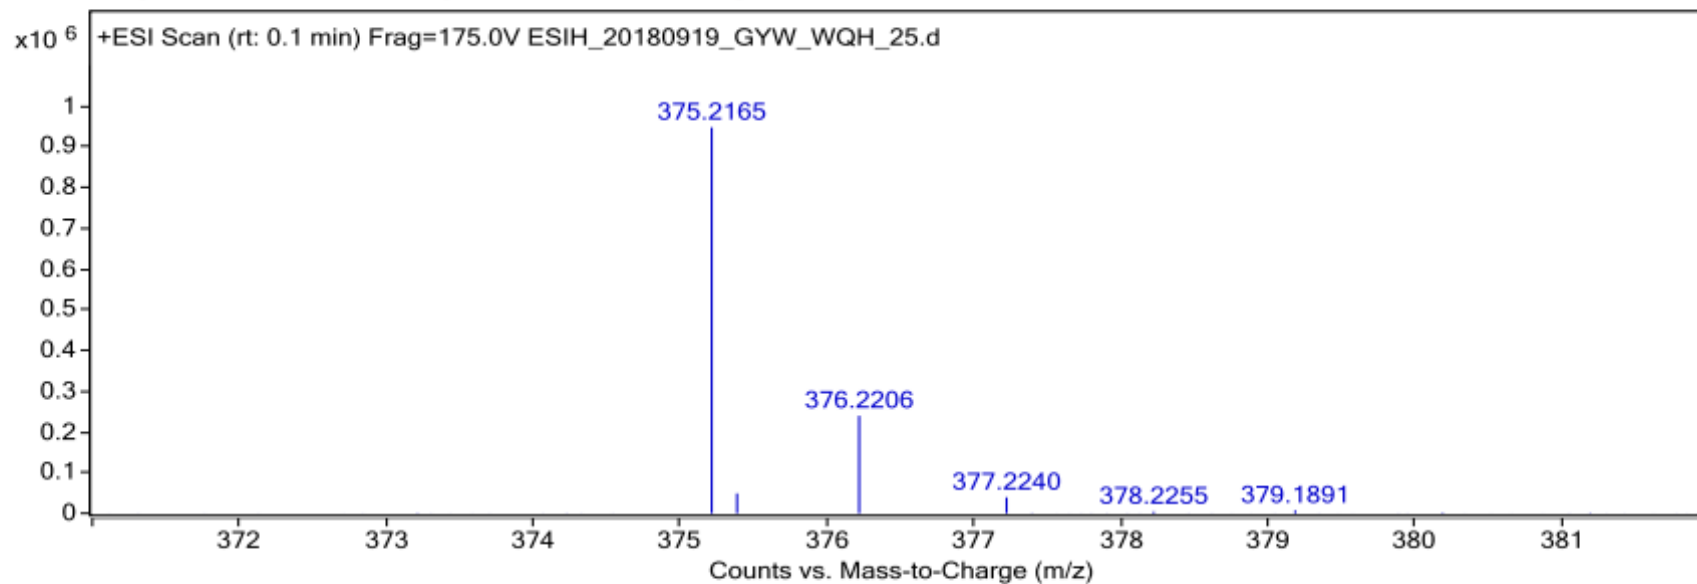

## Formula Calculator Results

| m/z      | Calc m/z | Diff (mDa) | Diff (ppm) | Ion Formula                                    | Ion                |
|----------|----------|------------|------------|------------------------------------------------|--------------------|
| 375.2165 | 375.2166 | 0.08       | 0.23       | C <sub>22</sub> H <sub>31</sub> O <sub>5</sub> | (M+H) <sup>+</sup> |

Figure S73. HR-ESI-MS (positive mode) spectrum of **6**.

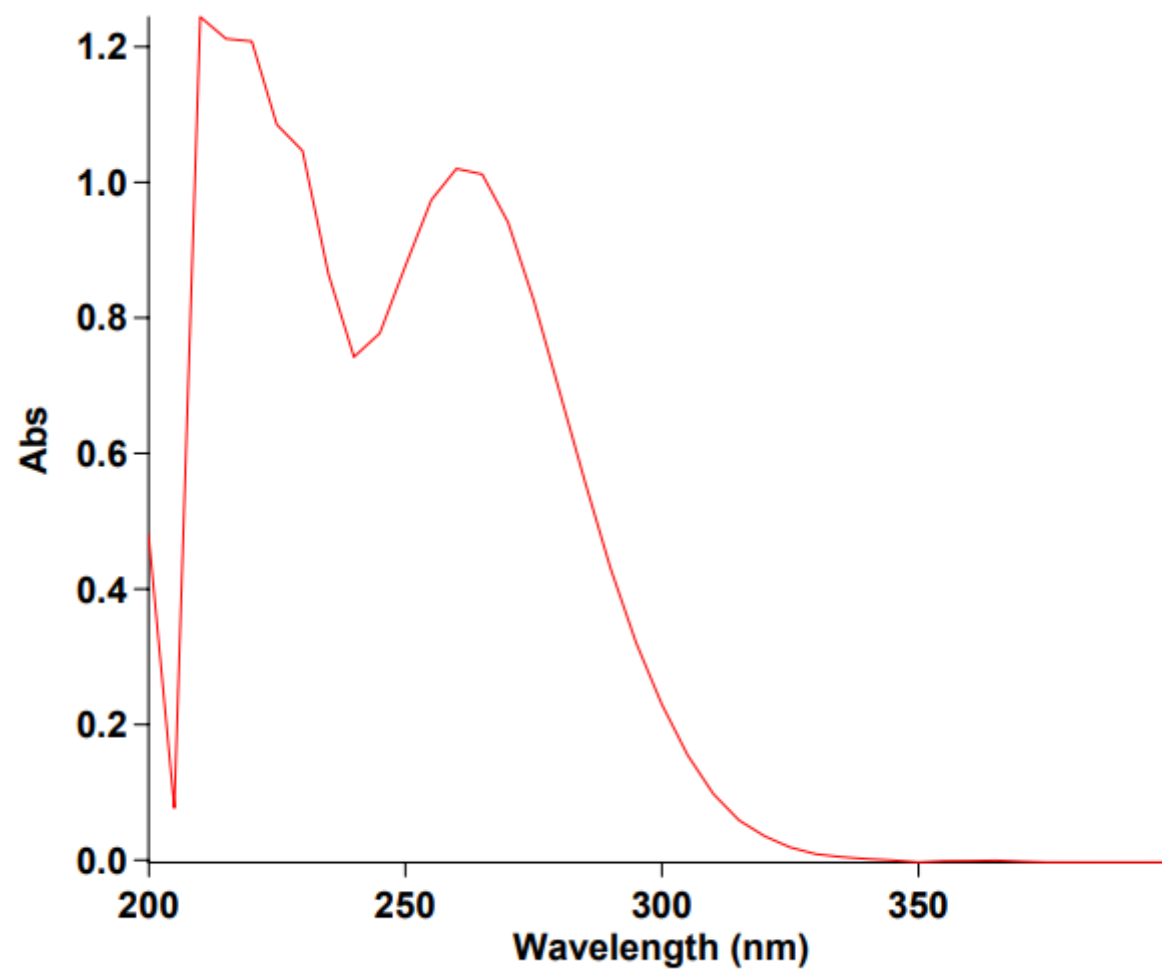

**Figure S74.** UV spectrum of **6**.

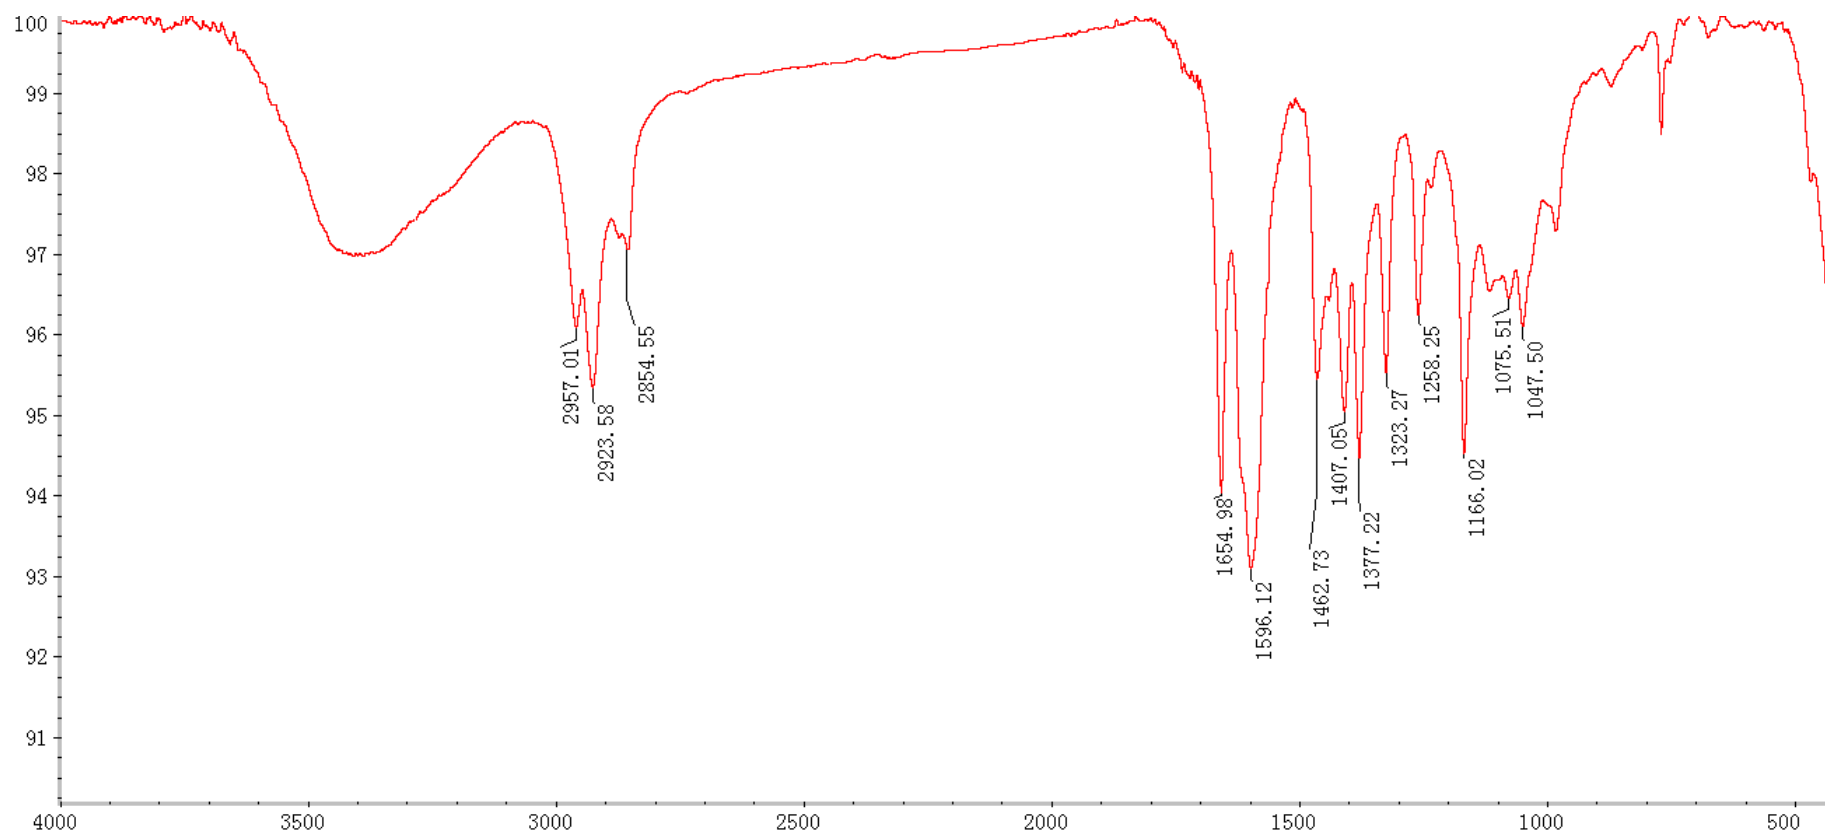

**Figure S75.** IR spectrum of **6**.

## 2. Computational Section

### 2.1 Computational details

Conformational searches were carried out using the torsional sampling (MCMM) method and OPLS\_2005 force field in the Macromodel 9.9.223 software applying an energy window of 21 kJ/mol, which afforded 5 conformers for (8*R*, 11*R*)-**1**, 3 conformers for (8*R*, 11*S*)-**3**, and 3 conformers for (8*R*, 11*S*)-**5** above 4% population for re-optimization to keep the computational cost to a minimum. These conformers were re-optimized with Gaussian 09 using DFT at the B3LYP/6-311G(d,p) level of theory, all of which were subjected to TDDFT-ECD calculations at the mPW1PW91/6-31G\*\* level of theory.

## 2.3 Cartesian Coordinates, Relative Energies, and Boltzmann populations of all the calculated Low-energy conformers

**Table S2.** Cartesian Coordinates, Relative Energies, and Boltzmann Populations of Low-energy conformers of (8*R*,11*R*)-**1**.

Conformer **1-1**:

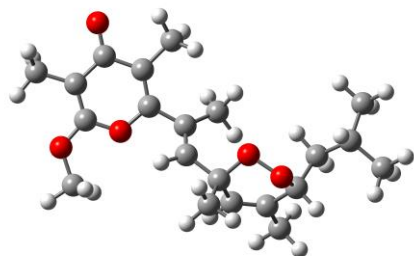

|   |             |             |             |   |             |             |             |
|---|-------------|-------------|-------------|---|-------------|-------------|-------------|
| C | 0.68425500  | 0.21989300  | 0.00670700  | H | 3.38000800  | -3.14070100 | -0.60980500 |
| C | 0.25627500  | -0.85043400 | -0.68349400 | H | 4.60710300  | -3.86569900 | 0.46475400  |
| C | -0.20837600 | 1.13198000  | 0.81653200  | H | 0.99802000  | -1.43763600 | -1.21334100 |
| C | -1.16432100 | -1.37026900 | -0.84860600 | H | -0.66017400 | 1.91304500  | 0.20206200  |
| O | -1.94280300 | -0.22131100 | -1.27154100 | H | -1.02063100 | 0.55645000  | 1.25835800  |
| O | -3.34309900 | -0.63696400 | -1.33409300 | H | 0.35241700  | 1.61493700  | 1.61778800  |
| C | -3.86078800 | -0.71788200 | 0.00644200  | H | -4.79876100 | -1.26143400 | -0.16123400 |
| C | -2.96927400 | -1.58815500 | 0.86960100  | H | -1.11201100 | -2.57328800 | 1.02198300  |
| C | -1.74230800 | -1.90025900 | 0.44862400  | H | -0.61013600 | -3.32251900 | -1.62320600 |
| C | -1.18450300 | -2.44921500 | -1.94244500 | H | -2.20986400 | -2.75893000 | -2.13958600 |
| C | -4.16168800 | 0.67099500  | 0.58805300  | H | -0.74218600 | -2.05796400 | -2.86241700 |
| C | -3.55071200 | -2.10556800 | 2.15757600  | H | -4.49536200 | 0.55661700  | 1.62565900  |
| C | -5.21272500 | 1.48170800  | -0.19451500 | H | -3.22092300 | 1.22648300  | 0.62001200  |
| C | -6.62704100 | 0.90237100  | -0.04623700 | H | -2.85739800 | -2.78717400 | 2.65320400  |
| C | -5.18537200 | 2.95137700  | 0.24776600  | H | -3.77788500 | -1.29120900 | 2.85294600  |
| H | 6.84543500  | -0.53634700 | 0.20765900  | H | -4.49011100 | -2.63956900 | 1.97733200  |
| H | 6.87280800  | 1.01505800  | -0.65401600 | H | -4.93520900 | 1.44289300  | -1.25412500 |
| H | 6.79848600  | 0.99367300  | 1.09980600  | H | -7.34759700 | 1.48664400  | -0.62567600 |
| H | 2.71821600  | 3.65180000  | -0.87954100 | H | -6.69246700 | -0.13192400 | -0.39447200 |
| H | 1.12052800  | 2.88250000  | -0.81438900 | H | -6.94617100 | 0.92330600  | 1.00174400  |
| H | 1.87794900  | 3.51758000  | 0.65369200  | H | -5.91056400 | 3.54510200  | -0.31633700 |
| H | 3.21733400  | -2.98831800 | 1.16355400  | H | -5.43457400 | 3.04425500  | 1.31079200  |
| C | 4.21027300  | -0.65526600 | 0.18327400  |   |             |             |             |
| C | 4.94990400  | 0.48547500  | 0.12911600  |   |             |             |             |
| C | 4.25140200  | 1.74650400  | -0.00040700 |   |             |             |             |
| C | 2.77605500  | 1.69175200  | -0.07687000 |   |             |             |             |
| C | 2.14341500  | 0.49785500  | 0.01691700  |   |             |             |             |
| O | 2.86935800  | -0.67181100 | 0.13523000  |   |             |             |             |
| C | 6.44982900  | 0.47812500  | 0.19950400  |   |             |             |             |
| C | 2.06856200  | 3.00140900  | -0.29275600 |   |             |             |             |
| O | 4.85606300  | 2.82900100  | -0.05777500 |   |             |             |             |
| O | 4.76218300  | -1.86138500 | 0.30604300  |   |             |             |             |
| C | 3.91998100  | -3.03449900 | 0.33149700  |   |             |             |             |

|   |             |            |            |
|---|-------------|------------|------------|
| H | -4.19695200 | 3.39475400 | 0.09622300 |
|---|-------------|------------|------------|

Relative Energy = -1194.61412550 a.u.  
Number of Imaginary Frequencies = 0  
P (%) = 33.75%

Conformer 1-2:

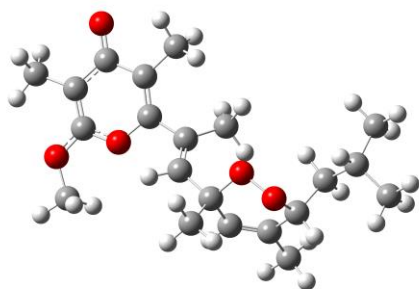

|   |             |             |             |
|---|-------------|-------------|-------------|
| C | -4.20109900 | -0.66340300 | -0.21034000 |
| C | -4.94596400 | 0.47377800  | -0.15343500 |
| C | -4.25603500 | 1.73476800  | 0.01792400  |
| C | -2.78165100 | 1.68516600  | 0.10591100  |
| C | -2.14293500 | 0.49618000  | -0.00041200 |
| O | -2.86054500 | -0.67555600 | -0.14373100 |
| C | -6.44447700 | 0.46173100  | -0.24764600 |
| C | -2.07912100 | 2.99266700  | 0.34748200  |
| O | -4.86682800 | 2.81251600  | 0.09536400  |

|   |             |             |             |
|---|-------------|-------------|-------------|
| O | -4.74681300 | -1.87065700 | -0.34858000 |
| C | -3.89515400 | -3.03203000 | -0.45929600 |
| C | -0.68179500 | 0.22753500  | 0.02064700  |
| C | -0.25122000 | -0.82622000 | 0.73346300  |
| C | 0.20665600  | 1.13047100  | -0.80439100 |
| C | 1.17122900  | -1.33566800 | 0.91462200  |
| O | 1.95191900  | -0.16977300 | 1.28068700  |
| O | 3.35298200  | -0.58108100 | 1.34785900  |
| C | 3.85909200  | -0.71874800 | 0.00774500  |
| C | 2.96077200  | -1.62556800 | -0.80947400 |
| C | 1.73850500  | -1.92127700 | -0.36356100 |
| C | 1.19835000  | -2.36527300 | 2.05498900  |
| C | 4.15530300  | 0.64313400  | -0.63678200 |
| C | 3.53059300  | -2.19596400 | -2.08016200 |
| C | 5.20006300  | 1.49473800  | 0.10992300  |
| C | 6.61720200  | 0.91479700  | -0.00403500 |
| C | 5.16884200  | 2.94131400  | -0.40295200 |
| H | -6.82272900 | -0.52781500 | -0.50016400 |
| H | -6.89698900 | 0.77322400  | 0.69931000  |
| H | -6.78070000 | 1.17348800  | -1.00608300 |
| H | -2.72088200 | 3.62218100  | 0.96519600  |
| H | -1.12052100 | 2.86516500  | 0.84729900  |
| H | -1.91045300 | 3.53698700  | -0.58734700 |
| H | -3.22818100 | -2.94188900 | -1.31695900 |
| H | -3.31527900 | -3.17243900 | 0.45306800  |
| H | -4.57916100 | -3.86451600 | -0.60036000 |

|   |             |             |             |
|---|-------------|-------------|-------------|
| H | -0.99249600 | -1.40825100 | 1.27014500  |
| H | -0.36002900 | 1.60804500  | -1.60475200 |
| H | 0.66601300  | 1.91514000  | -0.20026700 |
| H | 1.01356500  | 0.54869600  | -1.24836200 |
| H | 4.79885700  | -1.25429700 | 0.19057800  |
| H | 1.10394300  | -2.61910800 | -0.90139000 |
| H | 0.62002600  | -3.25071200 | 1.77934900  |
| H | 2.22448500  | -2.66830500 | 2.25834700  |
| H | 0.76364200  | -1.93258400 | 2.95992200  |
| H | 4.49336100  | 0.48076700  | -1.66655800 |
| H | 3.21285200  | 1.19317800  | -0.69901400 |
| H | 2.83514400  | -2.90130400 | -2.53816800 |
| H | 3.74642500  | -1.41162300 | -2.81265300 |
| H | 4.47435300  | -2.71776500 | -1.88740200 |
| H | 4.91792300  | 1.50621100  | 1.16893000  |
| H | 7.33285200  | 1.53016100  | 0.54869300  |
| H | 6.68547300  | -0.10070400 | 0.39525200  |
| H | 6.94053700  | 0.88561800  | -1.05056500 |
| H | 5.88969300  | 3.56430200  | 0.13453400  |
| H | 5.42142000  | 2.98420900  | -1.46835300 |
| H | 4.17820300  | 3.38757800  | -0.27632400 |

Relative Energy = -1194.61411067 a.u.  
Number of Imaginary Frequencies = 0  
P (%) = 30.74%

Conformer 1-3:

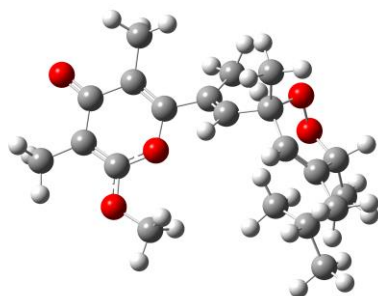

|   |             |             |             |
|---|-------------|-------------|-------------|
| C | 2.91184300  | 1.39758400  | 0.56258700  |
| C | 4.18341400  | 1.04024200  | 0.23644600  |
| C | 4.39706000  | -0.26756200 | -0.34815000 |
| C | 3.20586400  | -1.11568900 | -0.54064200 |
| C | 1.98053000  | -0.64064800 | -0.21474600 |
| O | 1.84235000  | 0.61472000  | 0.34567200  |
| C | 5.36174400  | 1.94045300  | 0.47284100  |
| C | 3.44654100  | -2.50506600 | -1.06278400 |
| O | 5.52921300  | -0.67074100 | -0.66094500 |
| O | 2.61784300  | 2.57204700  | 1.11994900  |
| C | 1.24548000  | 2.88693300  | 1.44103000  |
| C | 0.66600200  | -1.31782100 | -0.36140600 |
| C | -0.16006100 | -1.29020900 | 0.69636900  |
| C | 0.35818000  | -1.94399800 | -1.70893400 |
| C | -1.53660900 | -1.90070900 | 0.87377700  |

|   |             |             |             |
|---|-------------|-------------|-------------|
| O | -2.19640700 | -2.24296700 | -0.35751100 |
| O | -2.60338500 | -1.01124000 | -1.01810300 |
| C | -3.76840000 | -0.51150400 | -0.34539600 |
| C | -3.50253200 | -0.37145200 | 1.14094700  |
| C | -2.43791900 | -0.97619100 | 1.67033000  |
| C | -1.41473100 | -3.26044300 | 1.58839000  |
| C | -4.16483900 | 0.78406800  | -1.07540400 |
| C | -4.50440500 | 0.38697400  | 1.96927800  |
| C | -3.23928400 | 2.01272600  | -0.94687600 |
| C | -1.96028900 | 1.89548500  | -1.78947100 |
| C | -4.01540400 | 3.28164600  | -1.33260100 |
| H | 5.89875300  | 2.12095500  | -0.46281500 |
| H | 5.05773100  | 2.89868300  | 0.89141400  |
| H | 6.07422600  | 1.47073700  | 1.15788500  |
| H | 3.62810100  | -2.50113300 | -2.14245400 |
| H | 4.35029800  | -2.90374700 | -0.59789900 |
| H | 2.61668900  | -3.17890100 | -0.85553600 |
| H | 1.28272500  | 3.88699500  | 1.86463100  |
| H | 0.62707000  | 2.87981600  | 0.54336300  |
| H | 0.84940100  | 2.18271400  | 2.17302300  |
| H | 0.19485100  | -0.79892200 | 1.59805700  |
| H | 1.18683200  | -1.80366300 | -2.40131400 |
| H | 0.15499400  | -3.01359100 | -1.62799700 |
| H | -0.52843800 | -1.47950600 | -2.14166700 |
| H | -4.58472600 | -1.23410400 | -0.49176900 |
| H | -2.21348800 | -0.87873500 | 2.72874200  |

|   |             |             |             |
|---|-------------|-------------|-------------|
| H | -0.91032400 | -3.13104800 | 2.54772400  |
| H | -2.40755700 | -3.67874000 | 1.76517600  |
| H | -0.83100600 | -3.95459800 | 0.98073800  |
| H | -4.29945700 | 0.53657700  | -2.13437900 |
| H | -5.15959700 | 1.04550900  | -0.70105100 |
| H | -4.24516900 | 0.34338500  | 3.02828800  |
| H | -4.57016600 | 1.43840100  | 1.67509000  |
| H | -5.50682500 | -0.03866800 | 1.84775300  |
| H | -2.94047400 | 2.11076600  | 0.10350900  |
| H | -1.35065100 | 2.79835600  | -1.68615500 |
| H | -1.35821700 | 1.03747300  | -1.49078300 |
| H | -2.20831500 | 1.78165500  | -2.85078000 |
| H | -3.38457900 | 4.16995400  | -1.23754300 |
| H | -4.35797500 | 3.22707400  | -2.37185200 |
| H | -4.89473000 | 3.42284500  | -0.69740800 |

Relative Energy = -1194.61283221 a.u.

Number of Imaginary Frequencies = 0

P (%) = 9.34%



Conformer 1-4:

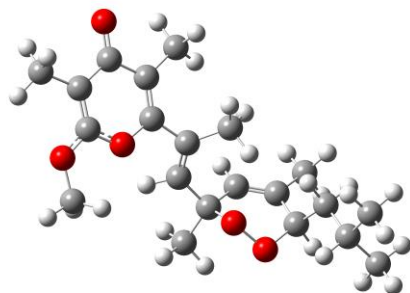

|   |             |             |             |
|---|-------------|-------------|-------------|
| C | 4.06048700  | 0.89418300  | 0.47406700  |
| C | 4.93382000  | -0.14809700 | 0.42495100  |
| C | 4.40955800  | -1.46565000 | 0.13298400  |
| C | 2.95627000  | -1.56807100 | -0.11256000 |
| C | 2.17958400  | -0.46334600 | -0.01571600 |
| O | 2.74026500  | 0.76638600  | 0.26774800  |
| C | 6.40531600  | 0.02281400  | 0.67017700  |
| C | 2.43601300  | -2.92494600 | -0.49845800 |
| O | 5.14017800  | -2.46738700 | 0.07475900  |
| O | 4.44699600  | 2.13868600  | 0.74943300  |
| C | 3.47600200  | 3.20830500  | 0.73507900  |
| C | 0.70831600  | -0.35374300 | -0.19073000 |
| C | 0.24119500  | 0.68282700  | -0.90600500 |
| C | -0.15856900 | -1.39313500 | 0.48551000  |
| C | -1.20363700 | 1.03738300  | -1.23212400 |

|   |             |             |             |
|---|-------------|-------------|-------------|
| O | -1.85007300 | 1.21893700  | 0.05601900  |
| O | -3.27194800 | 1.45246000  | -0.19481300 |
| C | -3.89774500 | 0.20281800  | -0.53815500 |
| C | -3.14498000 | -0.47966900 | -1.66291000 |
| C | -1.91855300 | -0.06601500 | -1.98443700 |
| C | -1.23421900 | 2.35479400  | -2.02202600 |
| C | -4.14761800 | -0.68102300 | 0.69283600  |
| C | -3.85904500 | -1.57982100 | -2.40085500 |
| C | -4.98653200 | -0.02525600 | 1.80636500  |
| C | -6.43519700 | 0.24174900  | 1.37301500  |
| C | -4.95525500 | -0.89805500 | 3.06905800  |
| H | 6.69694100  | 1.07206100  | 0.64732700  |
| H | 6.69344300  | -0.39164600 | 1.64210500  |
| H | 6.97437500  | -0.52247400 | -0.08644400 |
| H | 1.49981700  | -2.87248000 | -1.05116000 |
| H | 3.18477300  | -3.42227700 | -1.11693100 |
| H | 2.28371400  | -3.56028500 | 0.38003100  |
| H | 3.04697000  | 3.32460200  | -0.26056600 |
| H | 2.68661600  | 3.02358400  | 1.46361200  |
| H | 4.03916900  | 4.09696100  | 1.00692000  |
| H | 0.96644800  | 1.36962400  | -1.32834400 |
| H | -0.55972000 | -2.11524800 | -0.23042800 |
| H | 0.40018700  | -1.94181900 | 1.24328400  |
| H | -1.00474000 | -0.90387100 | 0.96321100  |
| H | -4.85655100 | 0.55204500  | -0.94065400 |
| H | -1.38783700 | -0.50141700 | -2.82568700 |

|   |             |             |             |
|---|-------------|-------------|-------------|
| H | -0.74629500 | 2.22528300  | -2.99140800 |
| H | -2.26422600 | 2.66651800  | -2.18912700 |
| H | -0.70632800 | 3.13508000  | -1.46741300 |
| H | -4.64482500 | -1.60102600 | 0.36427200  |
| H | -3.17767700 | -0.97999900 | 1.09919800  |
| H | -3.26559800 | -1.93170700 | -3.24642800 |
| H | -4.05968900 | -2.43683300 | -1.75000100 |
| H | -4.82765300 | -1.23492200 | -2.77892200 |
| H | -4.51950100 | 0.93604800  | 2.04819800  |
| H | -7.00301100 | 0.70118000  | 2.18717600  |
| H | -6.49580100 | 0.91581700  | 0.51455000  |
| H | -6.93828200 | -0.69316000 | 1.10185200  |
| H | -5.51787400 | -0.43189300 | 3.88304800  |
| H | -5.40074500 | -1.88029900 | 2.87597200  |
| H | -3.93070500 | -1.05838800 | 3.41719300  |

Relative Energy = -1194.61355798 a.u.

Number of Imaginary Frequencies = 0

P (%) = 13.07%

Conformer 1-5:

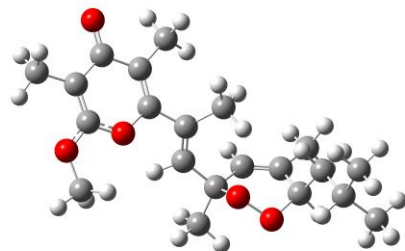

|   |             |             |             |
|---|-------------|-------------|-------------|
| C | 4.05824300  | 0.90217700  | 0.46492500  |
| C | 4.93199700  | -0.14042400 | 0.43116900  |
| C | 4.41081600  | -1.46017300 | 0.14426900  |
| C | 2.95808000  | -1.56732400 | -0.10139000 |
| C | 2.17988600  | -0.46287200 | -0.01506100 |
| O | 2.73859300  | 0.77032900  | 0.25675400  |
| C | 6.40279900  | 0.03112800  | 0.67947500  |
| C | 2.43965000  | -2.92812800 | -0.47552100 |
| O | 5.14436800  | -2.46015200 | 0.09270800  |
| O | 4.44220100  | 2.15116800  | 0.72356100  |
| C | 3.46406100  | 3.21423100  | 0.72321200  |
| C | 0.70846400  | -0.35712800 | -0.19152200 |
| C | 0.24050900  | 0.66947800  | -0.92039900 |
| C | -0.15717900 | -1.38816200 | 0.49899900  |
| C | -1.20473300 | 1.01959700  | -1.24951000 |

|   |             |             |             |
|---|-------------|-------------|-------------|
| O | -1.84888700 | 1.21882600  | 0.03710200  |
| O | -3.27116900 | 1.44886800  | -0.21459400 |
| C | -3.89747700 | 0.19450700  | -0.53923700 |
| C | -3.14688400 | -0.50321700 | -1.65611500 |
| C | -1.92113200 | -0.09376400 | -1.98558900 |
| C | -1.23604600 | 2.32612500  | -2.05732700 |
| C | -4.14448500 | -0.67225400 | 0.70433700  |
| C | -3.86186900 | -1.61384300 | -2.37739400 |
| C | -4.98135800 | -0.00137600 | 1.81035800  |
| C | -6.43111500 | 0.25862200  | 1.37639000  |
| C | -4.94670300 | -0.85618400 | 3.08521200  |
| H | 6.67229300  | 1.08085500  | 0.78506700  |
| H | 6.70774400  | -0.49817400 | 1.58774700  |
| H | 6.97860900  | -0.40021900 | -0.14392500 |
| H | 1.50148400  | -2.88188700 | -1.02547500 |
| H | 3.18732900  | -3.42851800 | -1.09288000 |
| H | 2.29175200  | -3.55721400 | 0.40821200  |
| H | 3.01633200  | 3.32447300  | -0.26479000 |
| H | 2.68907600  | 3.02682500  | 1.46648000  |
| H | 4.02613400  | 4.10746500  | 0.98202700  |
| H | 0.96525200  | 1.35098500  | -1.35211900 |
| H | -0.56472800 | -2.11529900 | -0.20820900 |
| H | 0.40444300  | -1.93161700 | 1.25836000  |
| H | -0.99928000 | -0.89232100 | 0.97730100  |
| H | -4.85721000 | 0.53802100  | -0.94448600 |
| H | -1.39196200 | -0.54041200 | -2.82189300 |

|   |             |             |             |
|---|-------------|-------------|-------------|
| H | -0.74953100 | 2.18298400  | -3.02549800 |
| H | -2.26610400 | 2.63616000  | -2.22725400 |
| H | -0.70691600 | 3.11363900  | -1.51424100 |
| H | -4.64209200 | -1.59682900 | 0.38956600  |
| H | -3.17361200 | -0.96526900 | 1.11277200  |
| H | -3.27099900 | -1.97521500 | -3.22075300 |
| H | -4.05832000 | -2.46298800 | -1.71500500 |
| H | -4.83258100 | -1.27555200 | -2.75597700 |
| H | -4.51444000 | 0.96352500  | 2.03764700  |
| H | -6.99744800 | 0.72944400  | 2.18505600  |
| H | -6.49391500 | 0.92021800  | 0.50843200  |
| H | -6.93426400 | -0.68034400 | 1.11976300  |
| H | -5.50769800 | -0.37881100 | 3.89380400  |
| H | -5.39206200 | -1.84132000 | 2.90712500  |
| H | -3.92126100 | -1.01101600 | 3.43322300  |

Relative Energy = -1194.61356345 a.u.

Number of Imaginary Frequencies = 0

P (%) = 13.1%

**Table S3.** Cartesian Coordinates, Relative Energies, and Boltzmann Populations of Low-energy conformers of (8*R*,11*S*)-**3**.

Conformer **3-1**:

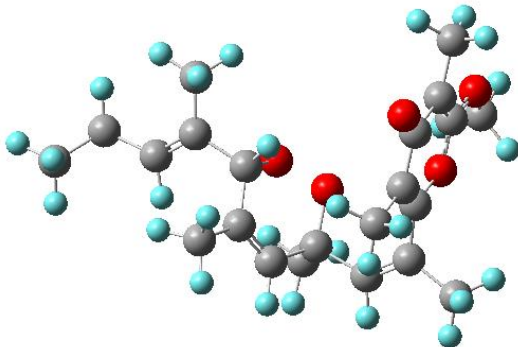

|   |            |             |             |
|---|------------|-------------|-------------|
| C | 3.08316100 | 1.88770100  | 0.21602100  |
| C | 3.15108400 | 1.01885600  | -0.82985500 |
| O | 2.76379700 | -0.26458100 | -0.75474900 |
| C | 2.23012900 | -0.76501300 | 0.41125400  |
| C | 2.13903700 | -0.00845000 | 1.52283500  |
| C | 2.57464400 | 1.39899600  | 1.48248200  |
| O | 2.49511200 | 2.12389900  | 2.48762900  |
| C | 3.52779600 | 3.31792100  | 0.10216300  |
| C | 1.58592200 | -0.52416100 | 2.82000600  |
| C | 1.91649700 | -2.21499300 | 0.27454300  |
| O | 3.62279500 | 1.37055300  | -2.02604000 |
| C | 3.53801800 | 0.43420400  | -3.12296000 |

|   |             |             |             |
|---|-------------|-------------|-------------|
| C | 3.06036900  | -3.13148000 | 0.65076400  |
| C | 0.74925700  | -2.70240000 | -0.15737200 |
| C | -0.51999600 | -2.00057000 | -0.60629300 |
| C | -1.50719400 | -1.99699000 | 0.54633000  |
| C | -2.14709700 | -0.90049200 | 0.95726600  |
| C | -1.95389400 | 0.39231200  | 0.18925800  |
| O | -1.38431500 | 0.11900600  | -1.11119200 |
| O | -0.15423500 | -0.64332400 | -0.92631900 |
| C | -1.08181300 | -2.70336400 | -1.85395800 |
| C | -2.98193100 | -0.86335700 | 2.20855100  |
| C | -3.20254700 | 1.20284300  | -0.14253200 |
| C | -3.02512100 | 2.69516400  | -0.03234400 |
| C | -4.30260800 | 0.57200800  | -0.57119800 |
| C | -5.61076500 | 1.16541200  | -1.01053200 |
| C | -6.78969000 | 0.70193200  | -0.13692500 |
| H | 4.45413900  | 3.48718000  | 0.66138200  |
| H | 3.69924800  | 3.60303900  | -0.93501600 |
| H | 2.77412500  | 3.98118900  | 0.53351800  |
| H | 1.29606400  | -1.57228900 | 2.75456200  |
| H | 2.32189700  | -0.40782700 | 3.62028100  |
| H | 0.70897700  | 0.05952800  | 3.11433400  |
| H | 4.15477100  | -0.44361700 | -2.92893400 |

|   |             |             |             |
|---|-------------|-------------|-------------|
| H | 3.91922100  | 0.97831900  | -3.98290200 |
| H | 2.50374300  | 0.13393200  | -3.29251600 |
| H | 3.35778000  | -2.97508100 | 1.69247000  |
| H | 2.78861500  | -4.17991600 | 0.51893300  |
| H | 3.94019500  | -2.92144800 | 0.03401200  |
| H | 0.65433900  | -3.78492000 | -0.20054300 |
| H | -1.63049800 | -2.93828800 | 1.07363500  |
| H | -1.25371300 | 1.03087900  | 0.74442800  |
| H | -0.31979200 | -2.74877300 | -2.63596300 |
| H | -1.39723200 | -3.72131300 | -1.61310500 |
| H | -1.94495500 | -2.15056100 | -2.22440700 |
| H | -2.60711900 | -0.09656700 | 2.89630500  |
| H | -4.02383300 | -0.61246800 | 1.99515900  |
| H | -2.95149000 | -1.82425300 | 2.72501500  |
| H | -3.90735100 | 3.25182200  | -0.34562700 |
| H | -2.79250300 | 2.98122600  | 0.99931600  |
| H | -2.18068600 | 3.02377100  | -0.64807200 |
| H | -4.26972400 | -0.51650900 | -0.60415300 |
| H | -5.56916800 | 2.25630800  | -1.02045100 |
| H | -5.80019600 | 0.85311600  | -2.04548200 |
| H | -7.73353100 | 1.10416900  | -0.51425400 |
| H | -6.86937500 | -0.38899200 | -0.12795100 |

|                                       |             |            |            |
|---------------------------------------|-------------|------------|------------|
| H                                     | -6.66671600 | 1.03744900 | 0.89636600 |
| Relative Energy = -1232.70620312 a.u. |             |            |            |
| Number of Imaginary Frequencies = 0   |             |            |            |
| P (%) = 88.64%                        |             |            |            |

Conformer 3-2:

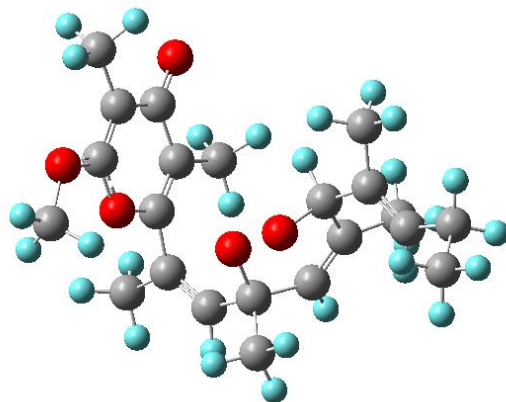

|   |             |             |             |
|---|-------------|-------------|-------------|
| C | -3.08534000 | 1.85679100  | -0.24776700 |
| C | -3.00821100 | 1.13803200  | 0.90591200  |
| O | -2.62857200 | -0.14895900 | 0.95461700  |
| C | -2.24608600 | -0.80642500 | -0.19223400 |
| C | -2.30636300 | -0.20742700 | -1.39828500 |
| C | -2.75003500 | 1.19471900  | -1.49289200 |
| O | -2.81714200 | 1.77380400  | -2.58928900 |

|   |             |             |             |
|---|-------------|-------------|-------------|
| C | -3.51458800 | 3.29590800  | -0.27123600 |
| C | -1.91999100 | -0.89889900 | -2.67406400 |
| C | -1.90690400 | -2.22918100 | 0.09163500  |
| O | -3.31825000 | 1.65404300  | 2.09527000  |
| C | -3.07594900 | 0.87704100  | 3.28888800  |
| C | -3.07827000 | -3.17893700 | -0.03505300 |
| C | -0.69428200 | -2.66536600 | 0.44610500  |
| C | 0.61021300  | -1.92003400 | 0.66215000  |
| C | 1.47212800  | -2.06295000 | -0.57956900 |
| C | 2.07122400  | -1.02842000 | -1.17261300 |
| C | 1.96388900  | 0.34536500  | -0.53957500 |
| O | 1.51581400  | 0.23201300  | 0.82979300  |
| O | 0.27261100  | -0.53058100 | 0.84735900  |
| C | 1.30593900  | -2.46645200 | 1.92109100  |
| C | 2.77652000  | -1.14020600 | -2.49684800 |
| C | 3.24803600  | 1.15933400  | -0.41683900 |
| C | 3.07986700  | 2.63472700  | -0.67321100 |
| C | 4.37730800  | 0.55323400  | -0.03053900 |
| C | 5.72606500  | 1.16229300  | 0.22647500  |
| C | 6.19039500  | 0.95835000  | 1.67951400  |
| H | -4.50199600 | 3.40385600  | -0.73226300 |
| H | -3.55851800 | 3.71770000  | 0.73206500  |
| H | -2.81937300 | 3.88516400  | -0.87441500 |
| H | -1.58046700 | -1.91919400 | -2.49957200 |

|   |             |             |             |
|---|-------------|-------------|-------------|
| H | -2.76488300 | -0.91935900 | -3.36812500 |
| H | -1.11868200 | -0.34694400 | -3.17321100 |
| H | -3.69989800 | -0.01684400 | 3.30058900  |
| H | -3.34835300 | 1.53571800  | 4.10913300  |
| H | -2.02400000 | 0.59927100  | 3.35942300  |
| H | -3.49752100 | -3.14793300 | -1.04556500 |
| H | -2.78326200 | -4.20515200 | 0.18932500  |
| H | -3.88144000 | -2.89141200 | 0.65119100  |
| H | -0.58551200 | -3.73443300 | 0.61284900  |
| H | 1.53883500  | -3.05902000 | -1.00705100 |
| H | 1.22187100  | 0.93247900  | -1.09702900 |
| H | 0.63069700  | -2.40964200 | 2.77850200  |
| H | 1.60019200  | -3.50863500 | 1.77607000  |
| H | 2.19989700  | -1.87837000 | 2.12761800  |
| H | 2.32520200  | -0.46099900 | -3.22935900 |
| H | 3.83087500  | -0.86363600 | -2.41966100 |
| H | 2.70772800  | -2.15565400 | -2.89070600 |
| H | 3.98556900  | 3.20557300  | -0.47281400 |
| H | 2.78789000  | 2.81739500  | -1.71336200 |
| H | 2.27842300  | 3.03879100  | -0.04535700 |
| H | 4.33212200  | -0.52273500 | 0.13465400  |
| H | 6.45492600  | 0.68670400  | -0.44211400 |
| H | 5.73433900  | 2.22701900  | -0.01494600 |
| H | 7.19415000  | 1.36543600  | 1.82695800  |

|                                       |            |             |            |
|---------------------------------------|------------|-------------|------------|
| H                                     | 5.51472400 | 1.45717700  | 2.37949800 |
| H                                     | 6.21740500 | -0.10385400 | 1.93939700 |
| Relative Energy = -1232.70635021 a.u. |            |             |            |
| Number of Imaginary Frequencies = 0   |            |             |            |
| P (%) = 5.44%                         |            |             |            |

Conformer 3-3:

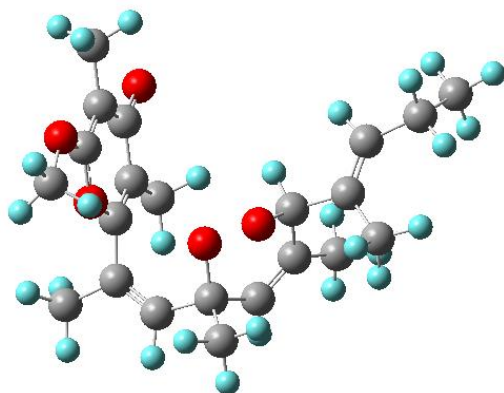

|   |             |             |             |
|---|-------------|-------------|-------------|
| C | -2.58312200 | 2.28936200  | -0.07094200 |
| C | -2.91670900 | 1.32840300  | 0.83377800  |
| O | -2.78200700 | 0.01263900  | 0.60284600  |
| C | -2.25042000 | -0.43608500 | -0.58496500 |
| C | -1.91154800 | 0.41946300  | -1.56978100 |
| C | -2.06641100 | 1.86986700  | -1.35852100 |

|   |             |             |             |
|---|-------------|-------------|-------------|
| O | -1.75425900 | 2.68312700  | -2.24341000 |
| C | -2.74506000 | 3.75455700  | 0.21731200  |
| C | -1.35144900 | -0.03089800 | -2.88815300 |
| C | -2.23917700 | -1.92497900 | -0.63584300 |
| O | -3.41984200 | 1.61647400  | 2.03407800  |
| C | -3.61686300 | 0.55309000  | 2.99214300  |
| C | -3.49979900 | -2.53116700 | -1.21307100 |
| C | -1.23411100 | -2.69293600 | -0.20390000 |
| C | 0.10052500  | -2.33058200 | 0.42244800  |
| C | 1.17410500  | -2.37466600 | -0.64747200 |
| C | 2.04836100  | -1.38579800 | -0.83625000 |
| C | 2.04627000  | -0.19708600 | 0.10993500  |
| O | 1.29253900  | -0.50569200 | 1.30177600  |
| O | -0.02554300 | -0.98044400 | 0.91181800  |
| C | 0.39738400  | -3.29033600 | 1.58705900  |
| C | 3.01736500  | -1.35302000 | -1.98601200 |
| C | 3.42187500  | 0.20284600  | 0.61903900  |
| C | 4.17546800  | -0.85165400 | 1.39088400  |
| C | 3.85826400  | 1.44420000  | 0.36782500  |
| C | 5.17474900  | 2.06685000  | 0.73775700  |
| C | 5.96836800  | 2.53780300  | -0.49328500 |
| H | -2.92619500 | 3.93702000  | 1.27587500  |
| H | -1.84788700 | 4.29735000  | -0.08944500 |
| H | -3.58034300 | 4.17813800  | -0.35055200 |

|   |             |             |             |
|---|-------------|-------------|-------------|
| H | -2.00093900 | 0.28778100  | -3.70845500 |
| H | -0.37804300 | 0.43635300  | -3.06079000 |
| H | -1.22981600 | -1.11249500 | -2.93310600 |
| H | -4.37080200 | -0.15011800 | 2.63771700  |
| H | -3.96287900 | 1.05180700  | 3.89347700  |
| H | -2.67958000 | 0.03031400  | 3.18416400  |
| H | -3.66250900 | -2.18611000 | -2.23898600 |
| H | -3.45138700 | -3.62115700 | -1.21461800 |
| H | -4.37503100 | -2.22393100 | -0.63152600 |
| H | -1.35581900 | -3.76832700 | -0.31045700 |
| H | 1.17148800  | -3.24418200 | -1.29810000 |
| H | 1.58307300  | 0.66384600  | -0.38782900 |
| H | -0.42747400 | -3.27849700 | 2.30373300  |
| H | 0.52706800  | -4.31111400 | 1.21975900  |
| H | 1.31471600  | -2.98315000 | 2.08898500  |
| H | 2.86449900  | -0.45338300 | -2.59235500 |
| H | 4.05556300  | -1.32594200 | -1.64204900 |
| H | 2.88762300  | -2.22395500 | -2.63042200 |
| H | 5.21135000  | -0.56940400 | 1.57388600  |
| H | 3.69877800  | -1.03465700 | 2.35843800  |
| H | 4.17310900  | -1.80561100 | 0.85522700  |
| H | 3.19250400  | 2.10290300  | -0.18873500 |
| H | 4.97579600  | 2.93604100  | 1.37775400  |
| H | 5.78644800  | 1.38372900  | 1.33032800  |

---

|   |            |            |             |
|---|------------|------------|-------------|
| H | 6.89120500 | 3.03984800 | -0.19123400 |
| H | 6.23563200 | 1.69304900 | -1.13397300 |
| H | 5.38435000 | 3.24161700 | -1.09348200 |

---

Relative Energy = -1232.70876047 a.u.

Number of Imaginary Frequencies = 0

P (%) = 5.92%

**Table S4.** Cartesian Coordinates, Relative Energies, and Boltzmann Populations of Low-energy conformers of (8*R*,11*S*)-**5**.

|                        |             |             |             |                                                                                   |             |             |             |  |
|------------------------|-------------|-------------|-------------|-----------------------------------------------------------------------------------|-------------|-------------|-------------|--|
| Conformer <b>5-1</b> : |             |             |             | 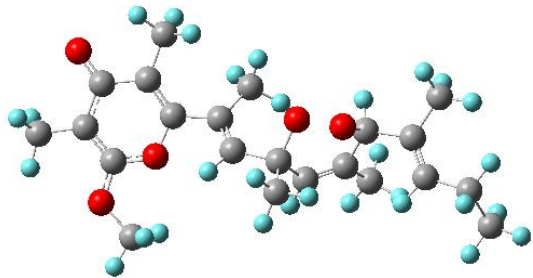 |             |             |             |  |
| C                      | 1.28232700  | 1.27831700  | -2.13018200 | H                                                                                 | -1.09953000 | 0.99445400  | -1.31331300 |  |
| C                      | 1.63231800  | 0.94280700  | 0.35156800  | H                                                                                 | 0.75857500  | 0.89076300  | -3.00797000 |  |
| O                      | 1.43842000  | -0.95130400 | -1.13552200 | H                                                                                 | 0.95531800  | 2.30634400  | -1.95451600 |  |
| C                      | 2.70912200  | 0.38587700  | 0.91054100  | H                                                                                 | 2.35430300  | 1.28163600  | -2.32382300 |  |
| C                      | 3.25829200  | 0.82736300  | 2.24029300  | H                                                                                 | 1.15221200  | 1.80090500  | 0.81266800  |  |
| C                      | 3.35304500  | -0.81091900 | 0.23724300  | H                                                                                 | 3.28672300  | -0.01406000 | 2.94221000  |  |
| C                      | 4.87227500  | -0.80452000 | 0.10023700  | H                                                                                 | 4.28232900  | 1.19868900  | 2.15419800  |  |
| C                      | 5.52024500  | -2.15151200 | 0.29267800  | H                                                                                 | 2.63698500  | 1.61114700  | 2.67682300  |  |
| C                      | 5.49981400  | 0.32503200  | -0.24938000 | H                                                                                 | 3.05176000  | -1.71900300 | 0.77787200  |  |
| O                      | 2.89959300  | -0.92638400 | -1.13007900 | H                                                                                 | 6.59553100  | -2.13369600 | 0.12041800  |  |
| C                      | -3.51869600 | 3.39218000  | 0.14899600  | H                                                                                 | 5.34598800  | -2.52245500 | 1.30865900  |  |
| C                      | 6.96478400  | 0.54274700  | -0.50077000 | H                                                                                 | 5.07983900  | -2.88561800 | -0.39093900 |  |
| C                      | 7.57792600  | 1.57861100  | 0.45772700  | H                                                                                 | 4.88804100  | 1.21941100  | -0.36217100 |  |
| H                      | -7.39062400 | 0.19506100  | -0.67953900 | H                                                                                 | -3.97524500 | 4.37605900  | 0.21498400  |  |
| H                      | -7.32747000 | 0.23972900  | 1.07432900  | H                                                                                 | -2.95048400 | 3.30284200  | -0.77722000 |  |
| H                      | -6.97718900 | 1.70905800  | 0.14743200  | H                                                                                 | -2.86768700 | 3.21990800  | 1.00621100  |  |
| H                      | -3.20005500 | -3.43198400 | 0.86958300  | H                                                                                 | 7.52302600  | -0.39306800 | -0.43448300 |  |
| H                      | -4.03347900 | -3.44142300 | -0.67311800 | H                                                                                 | 7.08769500  | 0.90463300  | -1.52962900 |  |
| H                      | -2.29457000 | -3.09358800 | -0.61333100 | H                                                                                 | 8.62848100  | 1.75801800  | 0.21456600  |  |
| H                      | -0.32889200 | -2.54002900 | 0.39957700  | H                                                                                 | 7.05065200  | 2.53496200  | 0.39483800  |  |
| H                      | 0.35736700  | -1.23695800 | 1.35587400  | H                                                                                 | 7.52342000  | 1.23336900  | 1.49370700  |  |
| H                      | -1.24029900 | -1.88384300 | 1.76281800  | Relative Energy = -1232.70532258 a.u.                                             |             |             |             |  |
|                        |             |             |             | Number of Imaginary Frequencies = 0                                               |             |             |             |  |
| C                      | -5.40238200 | 0.23877100  | 0.12152400  |                                                                                   |             |             |             |  |
| C                      | -4.39941100 | 1.15822600  | 0.11726000  |                                                                                   |             |             |             |  |
| O                      | -3.09728900 | 0.83424600  | 0.08840100  |                                                                                   |             |             |             |  |
| C                      | -2.69084200 | -0.48564500 | 0.05039500  |                                                                                   |             |             |             |  |
| C                      | -3.60355400 | -1.48541000 | 0.02009000  |                                                                                   |             |             |             |  |
| C                      | -5.04487700 | -1.16319800 | 0.07649400  |                                                                                   |             |             |             |  |
| O                      | -5.90326500 | -2.05982700 | 0.07244500  |                                                                                   |             |             |             |  |
| C                      | -6.85190200 | 0.62760700  | 0.16832100  |                                                                                   |             |             |             |  |
| C                      | -3.24652500 | -2.94087700 | -0.10771900 |                                                                                   |             |             |             |  |
| O                      | -4.63003400 | 2.46970900  | 0.15628300  |                                                                                   |             |             |             |  |
| C                      | -1.20853600 | -0.58610200 | 0.04117400  |                                                                                   |             |             |             |  |
| C                      | -0.57254400 | -1.62364800 | 0.94040200  |                                                                                   |             |             |             |  |
| C                      | -0.52954500 | 0.28145000  | -0.72771600 |                                                                                   |             |             |             |  |
| C                      | 0.97664400  | 0.40404500  | -0.90566600 |                                                                                   |             |             |             |  |

P (%) = 37.37%

Conformer 5-2:

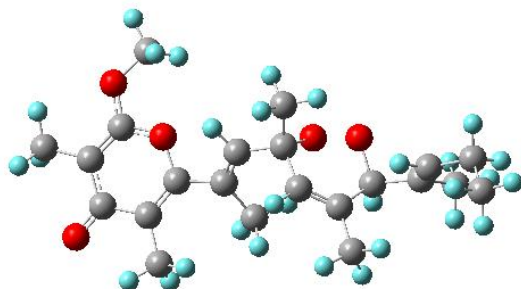

|   |            |             |             |
|---|------------|-------------|-------------|
| C | 5.43227100 | 0.02354400  | -0.03762500 |
| C | 4.51342100 | 1.02336700  | 0.04905700  |
| O | 3.18978300 | 0.81050400  | 0.10734500  |
| C | 2.66881700 | -0.46847700 | 0.07581600  |
| C | 3.48882800 | -1.54043800 | -0.03776400 |
| C | 4.95290200 | -1.34176400 | -0.07595400 |
| O | 5.72724600 | -2.30895800 | -0.15142400 |
| C | 6.90948300 | 0.28816200  | -0.08802000 |
| C | 3.00522000 | -2.95845600 | -0.16770600 |
| O | 4.85710700 | 2.30917500  | 0.10024900  |
| C | 1.18677600 | -0.44195700 | 0.17166600  |
| C | 0.52208300 | -1.46112400 | 1.07234300  |
| C | 0.53317900 | 0.51083700  | -0.51521300 |

|   |             |             |             |
|---|-------------|-------------|-------------|
| C | -0.96687500 | 0.77108600  | -0.56417500 |
| C | -1.24713600 | 2.01672700  | -1.41568500 |
| C | -1.72938700 | -0.43813600 | -1.06758000 |
| O | -1.33626600 | 1.02361300  | 0.81822000  |
| C | -2.80626700 | -0.93244200 | -0.45366300 |
| C | -3.46026300 | -2.22331700 | -0.86596700 |
| C | -3.33424500 | -0.23364300 | 0.78427600  |
| C | -4.84002200 | -0.00682800 | 0.87626700  |
| C | -5.40940600 | -0.16880300 | 2.26209500  |
| C | -5.51661700 | 0.38736800  | -0.20940200 |
| O | -2.79546300 | 1.10333700  | 0.88019700  |
| C | 3.82913700  | 3.32279900  | 0.15318000  |
| C | -6.97439700 | 0.72865400  | -0.33123700 |
| C | -7.70862100 | -0.17711700 | -1.33527100 |
| H | 7.36344700  | -0.27275200 | -0.90891600 |
| H | 7.12297400  | 1.34765900  | -0.22221000 |
| H | 7.39901700  | -0.04758100 | 0.83200500  |
| H | 1.99534800  | -3.02154800 | -0.56846900 |
| H | 3.68450700  | -3.49608100 | -0.83083000 |
| H | 3.02841100  | -3.48070400 | 0.79421400  |
| H | 1.23128600  | -1.86964900 | 1.79228700  |
| H | -0.29671100 | -0.99295300 | 1.61511400  |
| H | 0.10427900  | -2.29426400 | 0.50130400  |
| H | 1.12092500  | 1.19311400  | -1.11917900 |

|   |             |             |             |
|---|-------------|-------------|-------------|
| H | -0.65802100 | 2.86158400  | -1.04934600 |
| H | -0.97911600 | 1.83111800  | -2.45903100 |
| H | -2.30567000 | 2.26921300  | -1.36706000 |
| H | -1.32787000 | -0.92251100 | -1.95282500 |
| H | -3.47406000 | -2.93037500 | -0.02837300 |
| H | -4.49968300 | -2.07476500 | -1.16799100 |
| H | -2.91846200 | -2.68798300 | -1.69152200 |
| H | -3.00910800 | -0.80068200 | 1.66803800  |
| H | -6.47019000 | 0.07224400  | 2.31681100  |
| H | -5.27699700 | -1.19687700 | 2.61668300  |
| H | -4.87815400 | 0.47909600  | 2.96786600  |
| H | -4.95757200 | 0.47008200  | -1.14087000 |
| H | 3.21912200  | 3.29953900  | -0.75034100 |
| H | 4.37050500  | 4.26290400  | 0.21554300  |
| H | 3.19985200  | 3.18993200  | 1.03316100  |
| H | -7.47599000 | 0.68365200  | 0.63745600  |
| H | -7.05724300 | 1.76786300  | -0.67461900 |
| H | -8.75209900 | 0.13012700  | -1.44359300 |
| H | -7.24105000 | -0.13157300 | -2.32315800 |
| H | -7.69422700 | -1.21945100 | -1.00546700 |

Relative Energy = -1232.70494114 a.u.

Number of Imaginary Frequencies = 0

P (%) = 25.29%



Conformer 5-3:

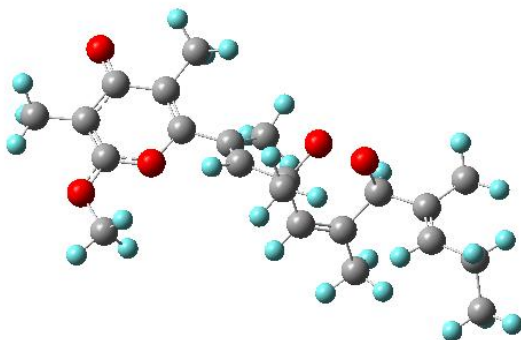

|   |            |             |             |
|---|------------|-------------|-------------|
| C | 5.40244600 | 0.23870300  | -0.12138000 |
| C | 4.39950600 | 1.15820000  | -0.11721100 |
| O | 3.09737500 | 0.83428700  | -0.08845500 |
| C | 2.69087500 | -0.48559200 | -0.05040300 |
| C | 3.60354500 | -1.48538100 | -0.02004200 |
| C | 5.04489600 | -1.16323700 | -0.07640500 |
| O | 5.90322300 | -2.05992800 | -0.07237800 |
| C | 6.85197500 | 0.62753000  | -0.16812100 |
| C | 3.24643100 | -2.94082400 | 0.10771300  |
| O | 4.63020200 | 2.46966600  | -0.15637200 |
| C | 1.20855800 | -0.58598800 | -0.04135000 |
| C | 0.57262800 | -1.62333200 | -0.94085300 |
| C | 0.52952600 | 0.28143700  | 0.72764700  |

|   |             |             |             |
|---|-------------|-------------|-------------|
| C | -0.97663800 | 0.40399700  | 0.90555100  |
| C | -1.28241800 | 1.27812200  | 2.13012500  |
| C | -1.63234600 | 0.94278200  | -0.35166400 |
| O | -1.43843600 | -0.95145300 | 1.13530200  |
| C | -2.70921200 | 0.38590900  | -0.91057100 |
| C | -3.25842400 | 0.82746100  | -2.24028900 |
| C | -3.35313300 | -0.81091200 | -0.23731500 |
| C | -4.87233800 | -0.80454000 | -0.10018300 |
| C | -5.52028600 | -2.15157500 | -0.29239100 |
| C | -5.49988500 | 0.32503900  | 0.24932600  |
| O | -2.89956000 | -0.92652700 | 1.12995700  |
| C | 3.51891800  | 3.39221700  | -0.14874800 |
| C | -6.96483600 | 0.54275000  | 0.50083200  |
| C | -7.57799600 | 1.57877900  | -0.45746300 |
| H | 7.32755900  | 0.23979300  | -1.07417900 |
| H | 6.97726300  | 1.70897400  | -0.14706900 |
| H | 7.39068600  | 0.19487100  | 0.67968600  |
| H | 3.20020700  | -3.43196300 | -0.86958200 |
| H | 4.03320500  | -3.44139800 | 0.67334000  |
| H | 2.29434200  | -3.09348500 | 0.61308300  |
| H | 0.32902700  | -2.53988100 | -0.40029400 |
| H | -0.35730000 | -1.23659500 | -1.35623500 |
| H | 1.24042500  | -1.88327300 | -1.76332000 |

|   |             |             |             |
|---|-------------|-------------|-------------|
| H | 1.09949000  | 0.99434200  | 1.31338200  |
| H | -0.75870800 | 0.89049200  | 3.00790300  |
| H | -0.95539300 | 2.30616500  | 1.95457700  |
| H | -2.35440000 | 1.28142800  | 2.32369900  |
| H | -1.15220200 | 1.80081700  | -0.81283800 |
| H | -3.28712400 | -0.01395800 | -2.94219400 |
| H | -4.28236600 | 1.19901200  | -2.15407500 |
| H | -2.63699900 | 1.61110800  | -2.67689400 |
| H | -3.05188600 | -1.71892800 | -0.77808300 |
| H | -6.59549300 | -2.13385100 | -0.11964100 |
| H | -5.34645400 | -2.52245900 | -1.30846600 |
| H | -5.07951300 | -2.88567200 | 0.39099100  |
| H | -4.88813200 | 1.21945200  | 0.36196100  |
| H | 3.97554000  | 4.37607000  | -0.21457700 |
| H | 2.95080600  | 3.30272000  | 0.77750600  |
| H | 2.86781300  | 3.22017400  | -1.00593500 |
| H | -7.52310100 | -0.39304200 | 0.43442000  |
| H | -7.08767500 | 0.90446900  | 1.52975700  |
| H | -8.62853800 | 1.75816500  | -0.21423700 |
| H | -7.05071200 | 2.53511300  | -0.39444300 |
| H | -7.52354100 | 1.23371100  | -1.49350300 |

Relative Energy = -1232.70532262 a.u.

Number of Imaginary Frequencies = 0

P (%) = 37.34%
